# Supplementary material for: Physiologically based pharmacokinetic-quantitative systems toxicology and safety (PBPK-QSTS) modeling approach applied to predict the variability of amitriptyline pharmacokinetics and cardiac safety in populations and in individuals
Source: PubMed Central journal article supplement (PMC6182726; doi:10.1007/s10928-018-9597-6), 2018-06-25

**Physiologically Based Pharmacokinetic – Quantitative Systems Toxicology and Safety (PBPK-QSTS) Modeling Approach Applied to Predict the Variability of Amitriptyline Pharmacokinetics and Cardiac Safety in Populations and in Individuals.**

Zofia Tylutki\*<sup>1</sup>, Aleksander Mendyk<sup>2</sup>, and Sebastian Polak<sup>1,3</sup>

1. Unit of Pharmacoepidemiology and Pharmacoeconomics, Department of Social Pharmacy, Faculty of Pharmacy, Jagiellonian University Medical College, Medyczna 9 Str., 30-688 Krakow, Poland

2. Department of Pharmaceutical Technology and Biopharmaceutics, Jagiellonian University Medical College, Medyczna 9 St., 30-688 Krakow, Poland

3. Certara-Simcyp, Level 2-Acero, 1 Concourse Way, Sheffield, S1 2BJ, United Kingdom

\*Corresponding author: Zofia Tylutki, [zofia.tylutki@doctoral.uj.edu.pl](mailto:zofia.tylutki@doctoral.uj.edu.pl)



|                       |                                   |           |          |        |    |         |         |         |  |            |          |           |           |             |             |             |        |         |        |                   |  |  |
|-----------------------|-----------------------------------|-----------|----------|--------|----|---------|---------|---------|--|------------|----------|-----------|-----------|-------------|-------------|-------------|--------|---------|--------|-------------------|--|--|
| Burch 1981 [9]        |                                   | 100       | single   | 4      | 2  | 18 – 40 |         |         |  |            |          |           |           |             |             |             |        |         |        |                   |  |  |
| Baumann 1986 [15]     |                                   | 75, 150   | multiple | 9      | 21 | 20 – 60 |         |         |  |            |          |           |           |             |             |             |        |         |        |                   |  |  |
| Gupta 1998 [16]       |                                   | 75        | multiple | 16     | 8  | 19 - 49 |         |         |  |            |          |           |           |             |             |             |        |         |        |                   |  |  |
| Gupta 1999 [3]        |                                   | 25        | multiple | 15     | 0  | 21 – 37 |         |         |  |            |          |           |           |             |             |             |        |         |        |                   |  |  |
| Miljković 1996 [17]   |                                   | 150       | multiple | 3      | 3  | 31 - 59 |         |         |  |            |          |           |           |             |             |             |        |         |        |                   |  |  |
|                       |                                   | 75        | multiple | 3      | 6  | 39 – 56 |         |         |  |            |          |           |           |             |             |             |        |         |        |                   |  |  |
| Schulz 1983 [18]      |                                   | 80        | single   | 1      | 0  | 21      |         |         |  |            |          |           |           |             |             |             |        |         |        |                   |  |  |
|                       |                                   | 40        | single   | 1      | 0  | 70      |         |         |  |            |          |           |           |             |             |             |        |         |        |                   |  |  |
| Vandel 1993 [19]      |                                   | 125       | multiple | 7      | 10 | 24 – 69 |         |         |  |            |          |           |           |             |             |             |        |         |        |                   |  |  |
| Pickup 1982 [20]      |                                   | PBPK-QSTS | 75       | single | 8  | 0       |         | 20-28   |  | 1.801 [21] | 3.5 [22] | 21.9 [22] | 2.27 [23] | CSS default | CSS default | CSS default | 10 / 8 | default | 1 / 2* | QTcB <sub>i</sub> |  |  |
| Upward 1988 [24]      | 150, 200                          |           | multiple | 5      | 7  | 29 – 61 | 10 / 12 | default |  |            |          |           |           |             |             |             | 1      | QTcB    |        |                   |  |  |
| Warrington 1989 [25]  | 75                                |           | multiple | 12     | 0  | 20-30   | 10 / 12 | default |  |            |          |           |           |             |             |             |        | ΔQTI    |        |                   |  |  |
| Zakynthinos 2000 [26] | PD model performance verification |           |          | 0      | 1  | 44      |         |         |  |            |          |           |           | 480         | 1           | 1           | QTcB   |         |        |                   |  |  |
| Schmidt 2015 [27]     |                                   |           |          | 0      | 1  | 54      |         |         |  |            |          |           |           | 638         |             |             |        |         |        |                   |  |  |
| Rudorfer 1982 [28]    | PBPK-QSTS                         | 7500      | multiple | 0      | 1  | 29      | 1111    |         |  |            |          |           |           |             | 10 / 1      | 1           | 1      | 462     |        |                   |  |  |
|                       |                                   | 3600      | single   | 1      | 0  | 25      |         |         |  |            |          |           |           |             |             |             |        | 429     |        |                   |  |  |
|                       |                                   | 750       | multiple | 0      | 1  | 29      |         |         |  |            |          |           |           |             |             |             |        | 429     |        |                   |  |  |
|                       |                                   | 2500      | multiple | 0      | 1  | 67      |         |         |  |            |          |           |           |             |             |             |        | 517     |        |                   |  |  |
|                       |                                   | 350       | single   | 0      | 1  | 19      |         |         |  |            |          |           |           |             |             |             |        | 500     |        |                   |  |  |

|                      |      |          |   |   |    |  |  |  |  |  |             |             |  |      |  |                |
|----------------------|------|----------|---|---|----|--|--|--|--|--|-------------|-------------|--|------|--|----------------|
|                      | 1500 | single   | 1 | 0 | 22 |  |  |  |  |  |             |             |  | 484  |  |                |
|                      | 375  | single   | 0 | 1 | 23 |  |  |  |  |  |             |             |  | 429  |  |                |
|                      | 3000 | single   | 0 | 1 | 39 |  |  |  |  |  |             |             |  | 400  |  |                |
|                      | 1750 | single   | 0 | 1 | 32 |  |  |  |  |  |             |             |  | 500  |  |                |
|                      | 2000 | multiple | 1 | 0 | 25 |  |  |  |  |  |             |             |  | 556  |  |                |
|                      | 1500 | multiple | 1 | 0 | 17 |  |  |  |  |  |             |             |  | 480  |  |                |
|                      | 3000 | single   | 0 | 1 | 19 |  |  |  |  |  |             |             |  | 476  |  |                |
| Erdem 2010 [29]      | 3750 | multiple | 1 | 0 | 24 |  |  |  |  |  | 2.9         | 136         |  | 429  |  | QT             |
| Kiyan 2006 [30]      | 300  | multiple | 0 | 1 | 33 |  |  |  |  |  | CSS default | CSS default |  | 500  |  | QTcB           |
| Paksu 2014 [31]      | 750  | multiple | 1 | 0 | 34 |  |  |  |  |  | CSS default | 137         |  | 500* |  | QTcB           |
| Abeyaratne 2016 [32] | 500  | single   | 0 | 1 | 25 |  |  |  |  |  | CSS default | CSS default |  | 364  |  | TdP occurrence |

\*40 individuals were simulated with the seed 1, and 40 with the seed 2; the file had to be divided because of technical issues, \*\*There was no data on RR interval length in the publication. The individual RR were predicted in the  $E_{max}$  model. The mean of model-predicted RR was used as input value in CSS.

Table 1: The details of simulation scenarios and settings.

References to the table:

1. Curry SH, DeVane CL, Wolfe MM (1985) Cimetidine Interaction with Amitriptyline. *Eur J Clin Pharmacol* 29:429–433
2. Venkatakrisnan K, Schmider J, Harmatz J, Ehrenberg B, von Moltke L, Graf J, Mertzanis P, Corbett K, Rodriguez M, Shader R, Greenblatt D (2001) Relative Contribution of CYP3A to Amitriptyline Clearance in Humans : In Vitro and In Vivo Studies. *J Clin Pharmacol* 41:1043–1054
3. Gupta SK, Shah JC, Hwang SS (1999) Pharmacokinetic and pharmacodynamic characterization of OROS and immediate-release amitriptyline. *J Clin Pharmacol* 48:71–78
4. Nam Y, Lim CH, Lee HS, Chung SJ, Chung YH, Shin YK, Kim MG, Sohn UD, Kim HC, Jeong JH (2015) Single-dose, Randomized, Open-label, 2-way Crossover Study of the Pharmacokinetics of Amitriptyline Hydrochloride 10- and 25-mg Tablet in Healthy Male Korean Volunteers. *Clin Ther* 37:302–310 . doi: 10.1016/j.clinthera.2014.09.010
5. Dorian P, Sellers EM, Reed KL, Warsh JJ, Hamilton C, Kaplan HL, Fan T (1983) Amitriptyline and Ethanol: Pharmacokinetic and Pharmacodynamic Interaction. *Eur J Clin Pharmacol* 25:325–331 . doi: 10.1007/BF01037943
6. Liedholm H, Lidén A (1998) Food intake and the presystemic metabolism of single doses of amitriptyline and nortriptyline. *Fundam Clin Pharmacol* 12:636–642 . doi: 10.1111/j.1472-8206.1998.tb00998.x
7. Ogura C, Kishimoto A, Mizukawa R, Hazama H, Honma H, Kawahara K (1983) Age Differences in Effects on Blood Pressure, Flicker Fusion Frequency, Salivation and Pharmacokinetics of Single Oral Doses of Dothiepin and Amitriptyline. *Eur J Clin Pharmacol* 25:811–814 . doi: 10.1007/BF00542525
8. Bhatt M, Shah S, Shivprakash (2010) Development and validation of amitriptyline and its metabolite in human plasma by ultra performance liquid chromatography-tandem mass spectrometry and its application to a bioequivalence study. *Biomed Chromatogr* 24:1247–1254 . doi: 10.1002/bmc.1435
9. Burch JE, Hullin RP (1981) Amitriptyline pharmacokinetics. A crossover study with single doses of amitriptyline and nortriptyline. *Psychopharmacology (Berl)* 74:35–42 . doi: 10.1007/BF00431754
10. Ghahramani P, Lennard MS (1996) Quantitative analysis of amitriptyline and nortriptyline in human plasma and liver microsomal preparations by high-performance liquid chromatography. *J Chromatogr B Biomed Appl* 685:307–313 . doi: 10.1016/S0378-4347(96)00193-4
11. Jang I-J, Shin J-G, Shin S-G, Park C-W, Kim J-J, Woo J-I, Chao I-J (1990) Pharmacokinetics of Amitriptyline Demethylation ; A Crossover Study with Single Doses of Amitriptyline and Nortriptyline. *Seoul J Med* 31:11–18

12. Mellstrom B, Bertilsson L, Lou Y-C, Sawe J, Sjoqvist F (1983) Amitriptyline metabolism: Relationship to polymorphic debrisoquine hydroxylation. *Clin Pharmacol Ther* 34:516–520 . doi: 10.1038/clpt.1983.207
13. Warrington SJ, Anker SI, Turner P (1984) An evaluation of possible interactions between ethanol and trazodone or amitriptyline. *Br J Clin Pharmacol* 18:549–557
14. Balant-Gorgia AE, Schulz P, Dayer L, Balant L, Kubli A, Gertsch C, Garrone G (1982) Role of oxidation polymorphism on blood and urine concentrations of amitriptyline and its metabolites in man. *Arch Psychiatry Neurol Sci* 232:215–222 . doi: 10.1007/BF02141782
15. Baumann P, Jonzier-Perey M, Koeb L, Le P, Tinguely D, Schopf J (1986) Amitriptyline Pharmacokinetics and Clinical Response: I. Free and Total Plasma Amitriptyline and Nortriptyline. *Int Clin Psychopharmacol* 1:89–101
16. Gupta SK, Shah J, Guinta D, Hwang S (1998) Multiple-Dose Pharmacokinetics Pharmacodynamics of OROS and Immediate-Release Amitriptyline Hydrochloride Formulations. *J Clin Pharmacol* 38:60–67
17. Miljkovic B, Pokrajac M, Timotijevic I, Varagic V (1996) Clinical response and plasma concentrations of amitriptyline and its metabolite-nortriptyline in depressive patients. *Eur J Drug Metab Pharmacokinet* 21:251–255
18. Schulz P, Turner-Tamiyasu K, Smith G, Giacomini KM, Blaschke TF (1983) Amitriptyline disposition in young and elderly normal men. *Clin Pharmacol Ther* 33:360–366 . doi: 10.1038/clpt.1983.46
19. Vandell S, Bertschy G, Perault MC, Sandoz M, Bouquet S, Chakroun R, Guibert S, Vandell B (1993) Minor and clinically non-significant interaction between toloxatone and amitriptyline. *Eur J Clin Pharmacol* 44:97–99 . doi: 10.1007/BF00315289
20. Pickup A, Bojanowski L, Dawling S, Dinsdale J, Gosling R (1982) Comparison of the Effect of Amitriptyline in Standard and Sustained-Release Formulations on Cardiac Systolic Time Intervals. *J Cardiovasc Pharmacol* 4:575–583
21. Guo L, Guthrie H (2005) Automated electrophysiology in the preclinical evaluation of drugs for potential QT prolongation. *J Pharmacol Toxicol Methods* 52:123–135 . doi: 10.1016/j.vascn.2005.04.002
22. Cao X, Lee YT, Holmqvist M, Lin Y, Ni Y, Mikhailov D, Zhang H, Hogan C, Zhou L, Lu Q, Digan ME, Urban L, Erdemli G (2010) Cardiac Ion Channel Safety Profiling on the IonWorks Quattro Automated Patch Clamp System. *Assay Drug Development Technol* 8:766–780 . doi: 10.1089/adt.2010.0333
23. Jeon S-H, Jaekal J, Lee SH, Choi B-H, Kim K-S, Jeong H-S, Han SY, Kim E-J (2011) Effects of nortriptyline on QT prolongation : A safety pharmacology study. *Hum Exp Toxicol* 30:1649–1656 . doi: 10.1177/0960327110396528

24. Upward J, Edwards J, Goldie A, Waller D (1988) Comparative effects of fluoxetine and amitriptyline on cardiac function. *Br J Clin Pharmacol* 26:399–402
25. Warrington SJ, Turner P, Skrumsager BK (1989) Cardiovascular (ECG and systolic time intervals) and anticholinergic effects of repeated doses of femoxetine - a comparison with amitriptyline and placebo in healthy men. *Br J Clin Pharmacol* 27:343–351
26. Zakyntinos E, Vassilakopoulos T, Roussos C, Zakyntinos S (2000) Abnormal atrial and ventricular repolarisation resembling myocardial injury after tricyclic antidepressant drug intoxication. *Heart* 83:353–354
27. Schmidt JJ, Bertram A, Kühn-Velten WN, Suhling H, Wiesner O, Schneider A, Kielstein JT (2015) Treatment of amitriptyline intoxications by extended high cut-off dialysis. *Clin Kidney J* 8:796–799 . doi: 10.1093/ckj/sfv094
28. Rudorfer M V (1982) Cardiovascular Changes and Plasma Drug Levels after Amitriptyline Overdose. *J Toxicol Clin Toxicol* 19:67–78
29. Erdem D, Akan B, Albayrak MD, Üstünbaş P, Ugiş C, Gögüs N (2010) Plasmapheresis Application in High-Dose Amitriptyline Intoxication. *Eur J Surg Sci* 1:58–62
30. Kiyani S, Aksay E, Yanturali S, Atilla R, Ersel M (2006) Acute Myocardial Infarction Associated with Amitriptyline Overdose. *Pharmacol Toxicol* 98:462–466
31. Paksu S, Duran L, Altuntas M, Zengin H, Salis O, Ozsevik SN, Albayrak H, Murat N, Guzel A, Paksu MS (2014) Amitriptyline overdose in emergency department of university hospital: Evaluation of 250 patients. *Hum Exp Toxicol* 33:980–990 . doi: 10.1177/0960327113520019
32. Abeyaratne DDK, Liyanapathirana C, Gamage A, Karunaratne P (2016) Survival after severe amitriptyline poisoning with prolonged ventricular tachycardia and cardiac arrest. *BMC Res Notes* 1–5 . doi: 10.1186/s13104-016-1963-0

Figure 1: The simulated PK profiles along with AT and NT concentrations observed in clinic

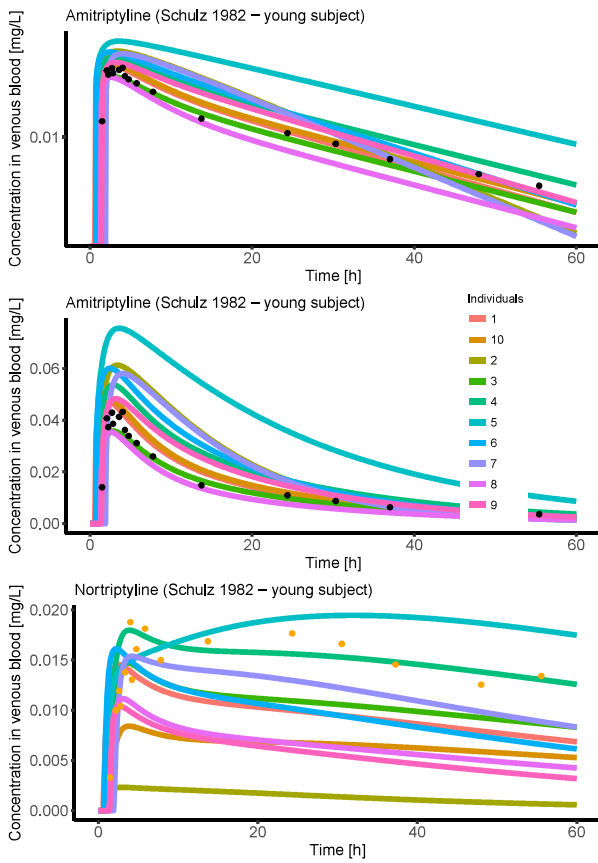

A

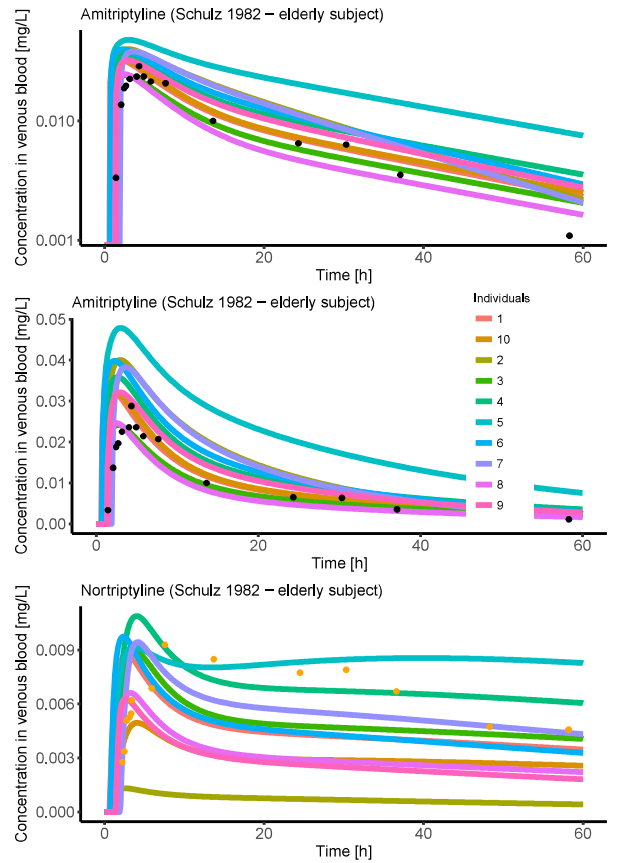

B

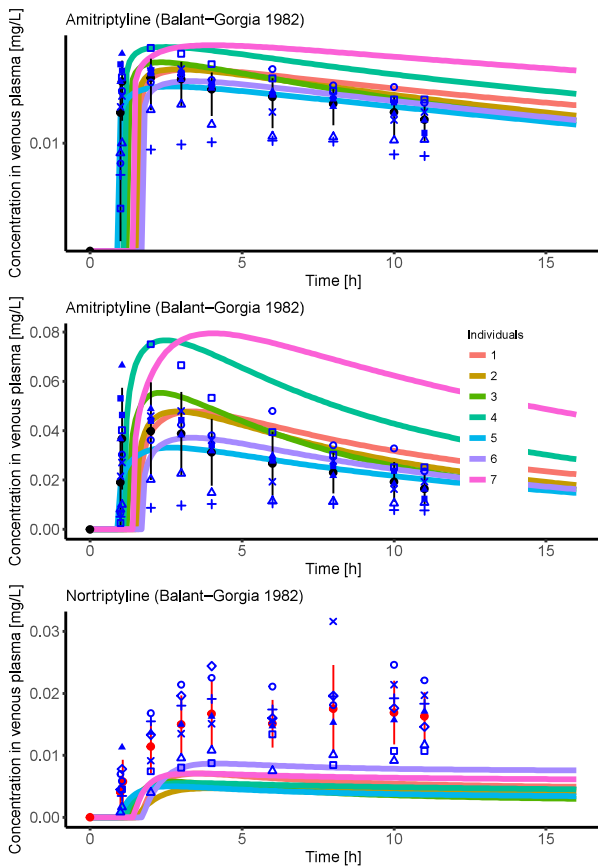

C

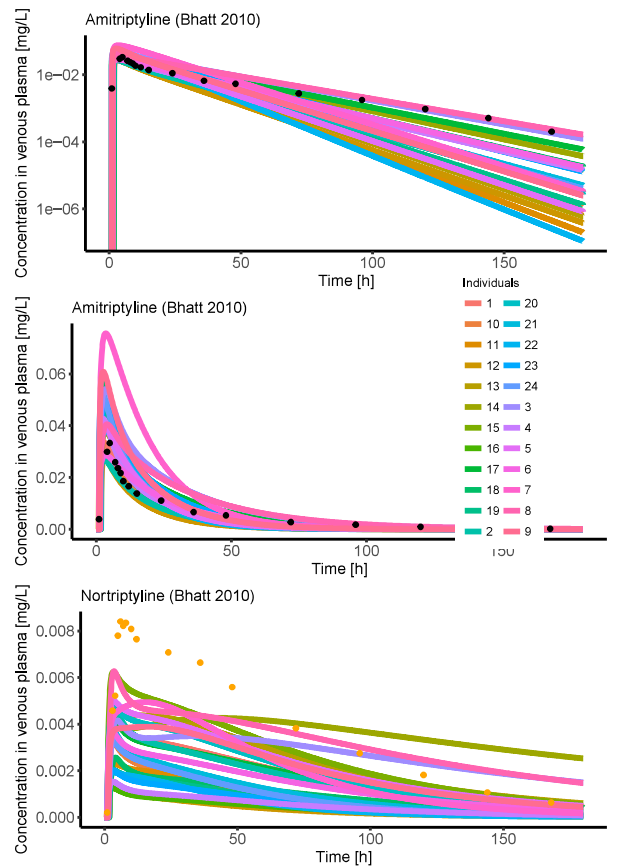

D



Figure 1 - Continued

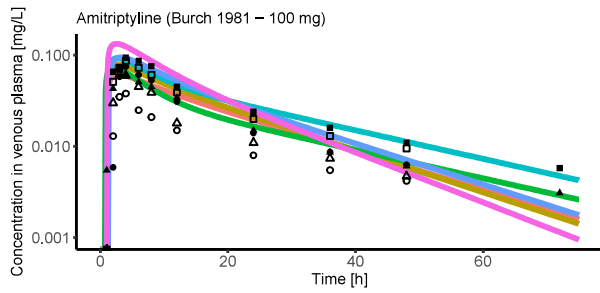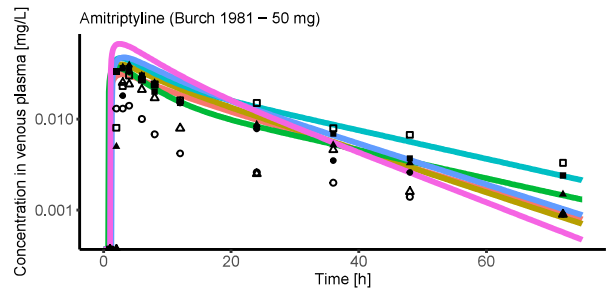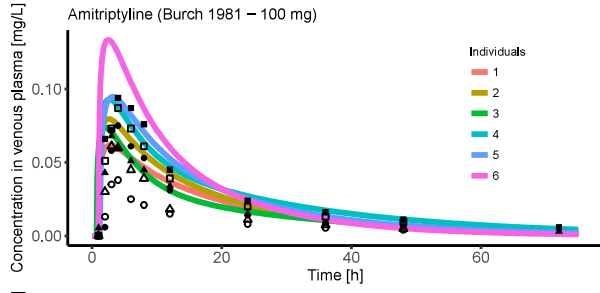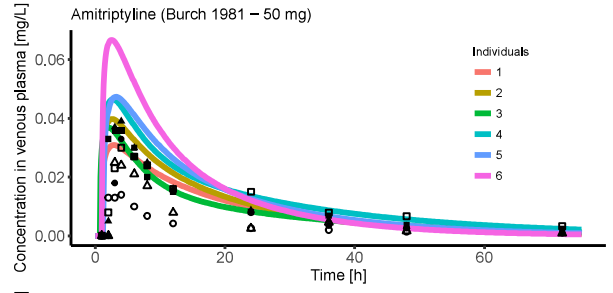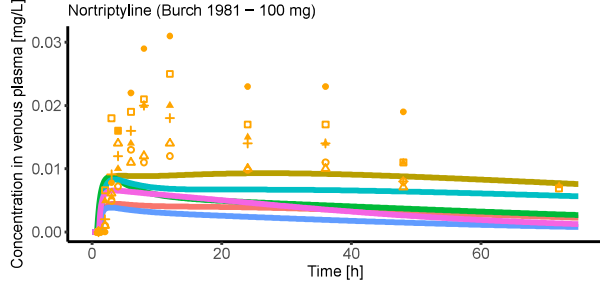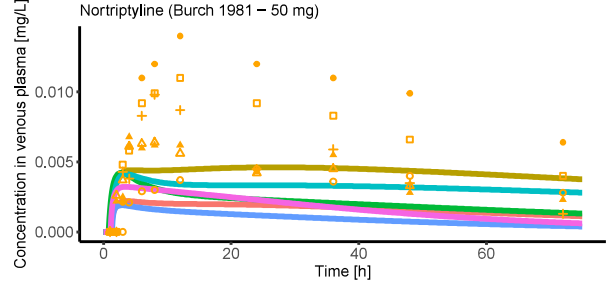

E

F

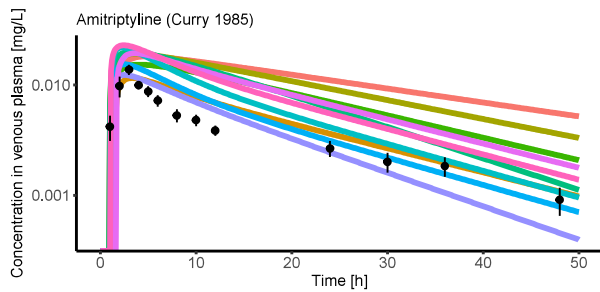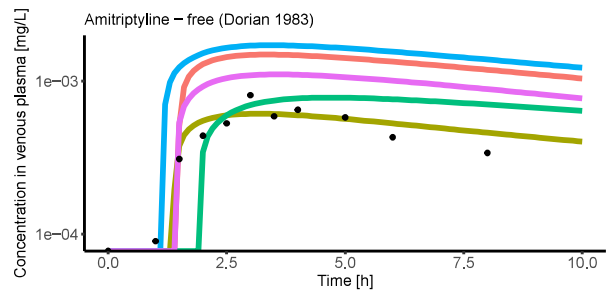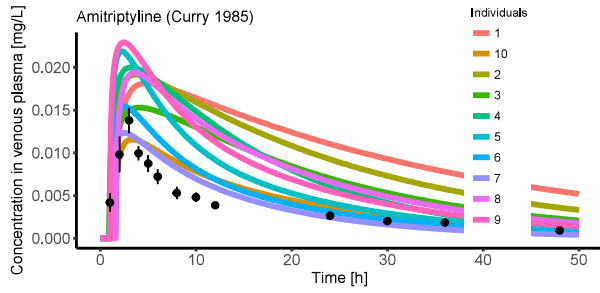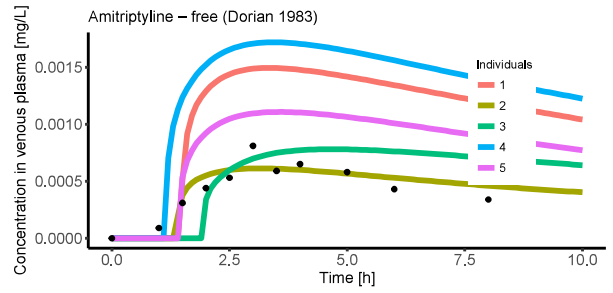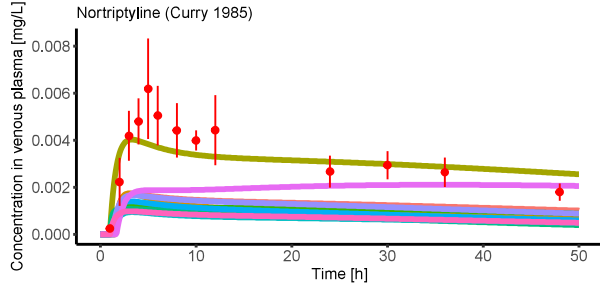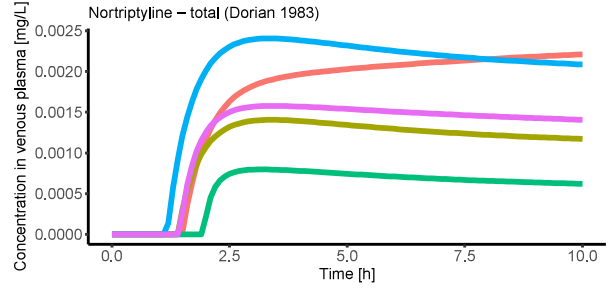

G

H

Figure 1 - Continued

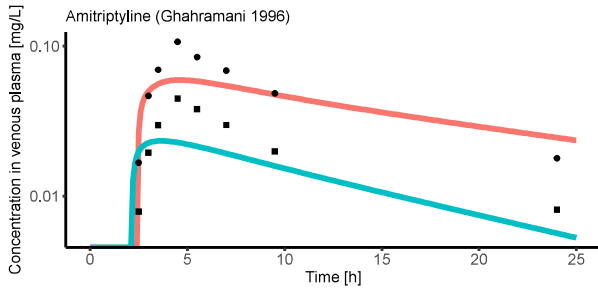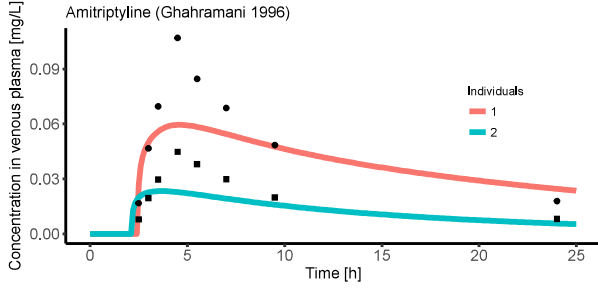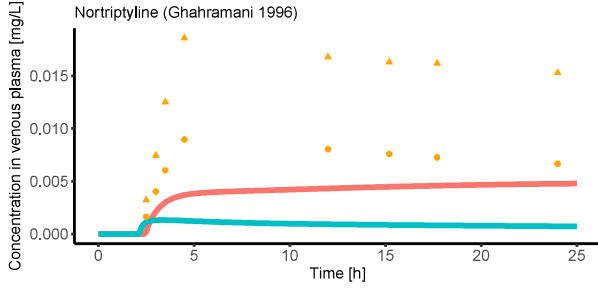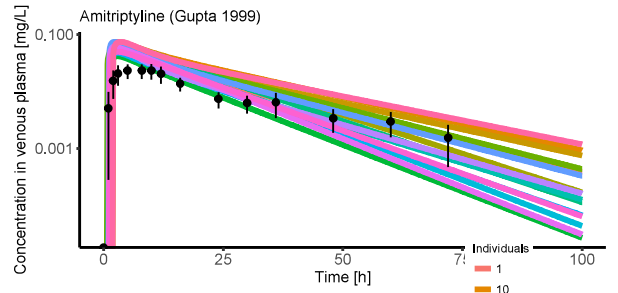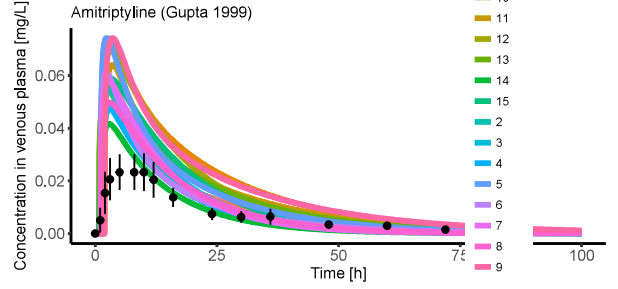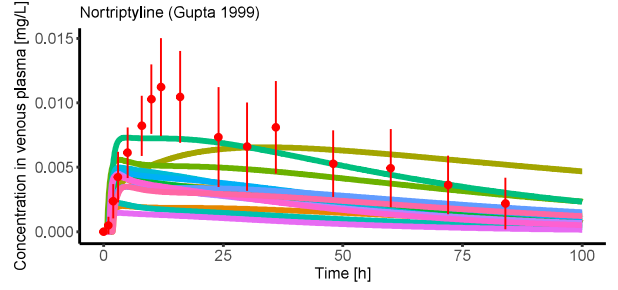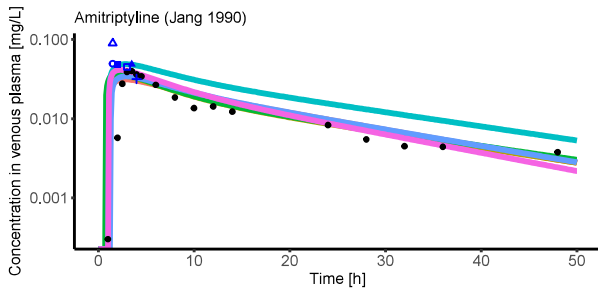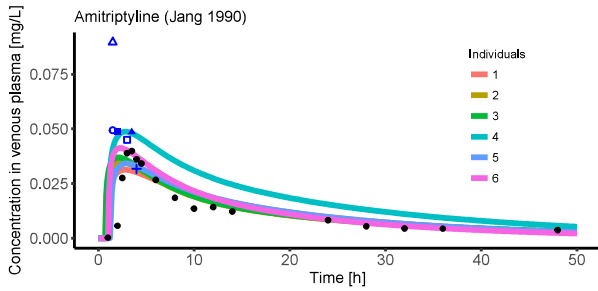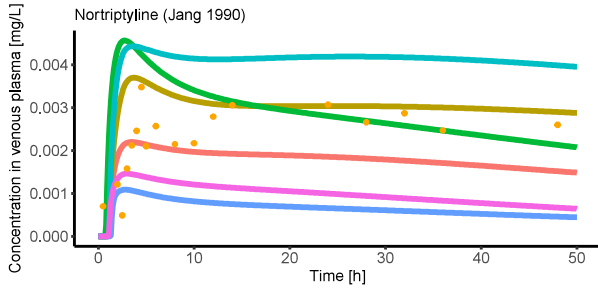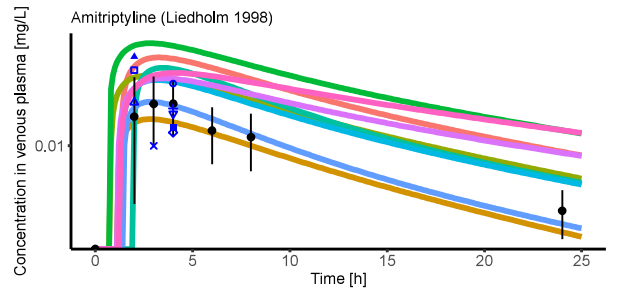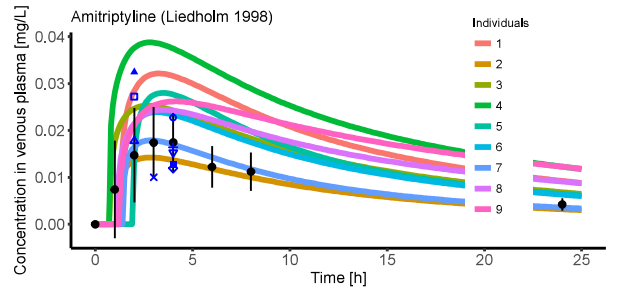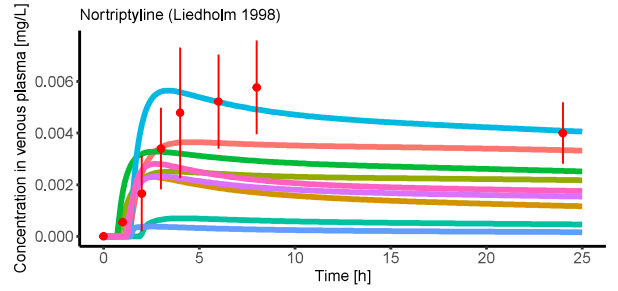

K

L

Figure 1 - Continued

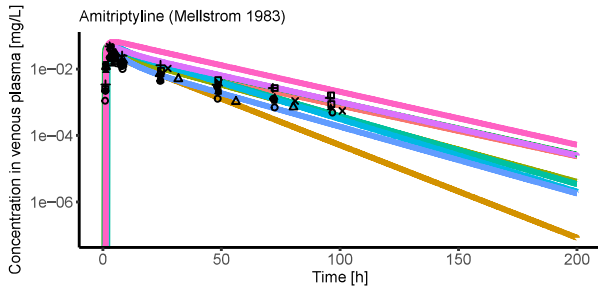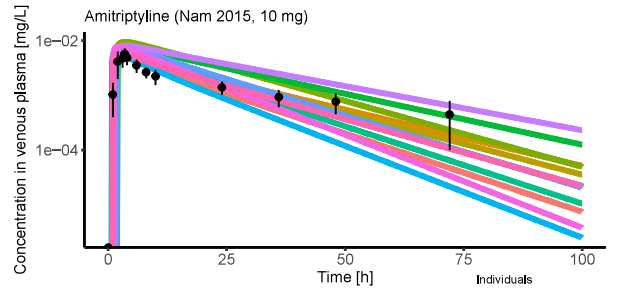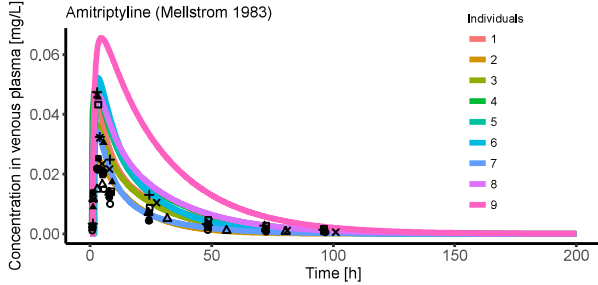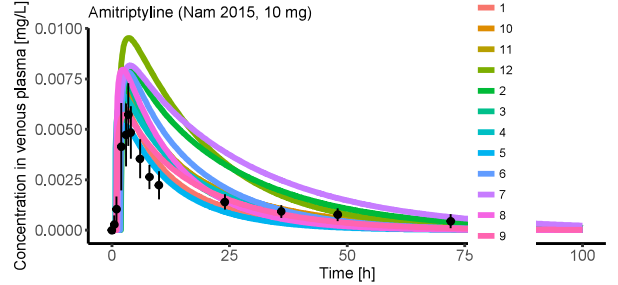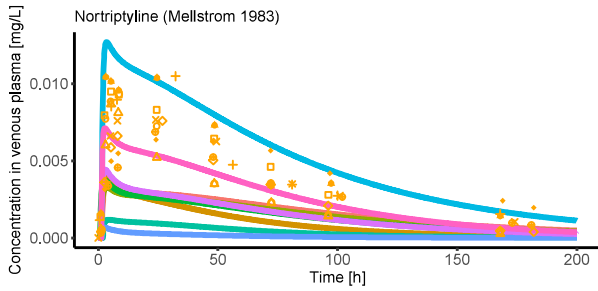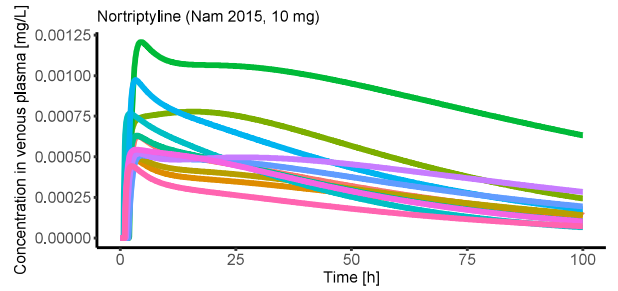

M

N

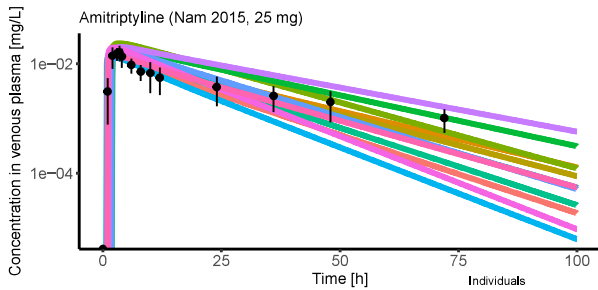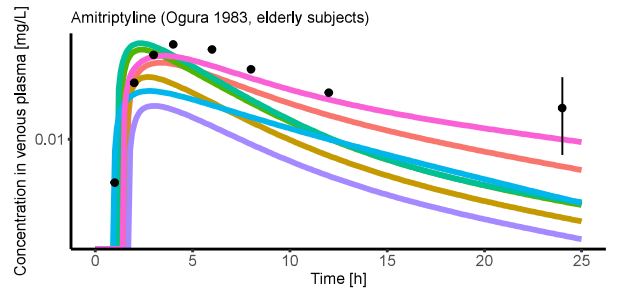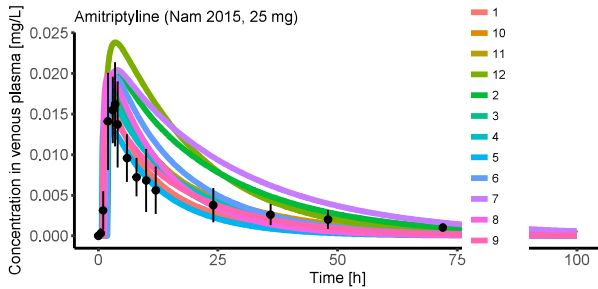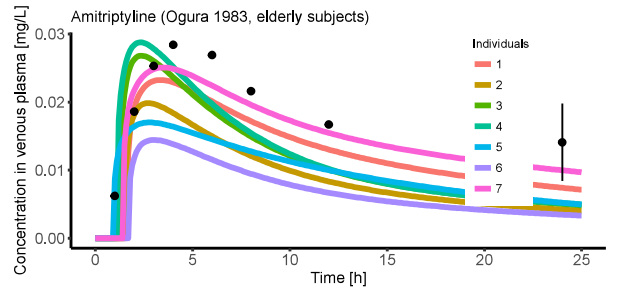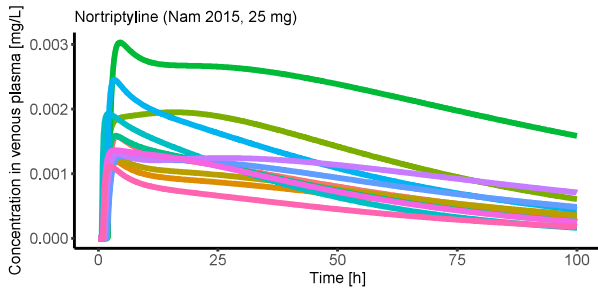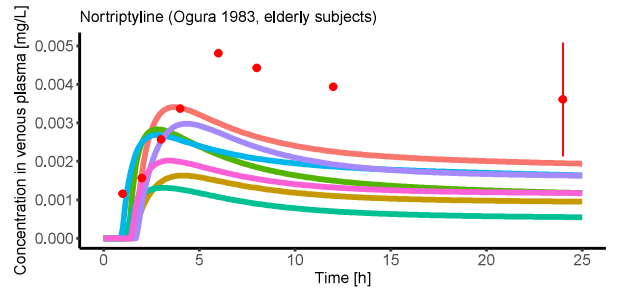

O

P

Figure 1 - Continued

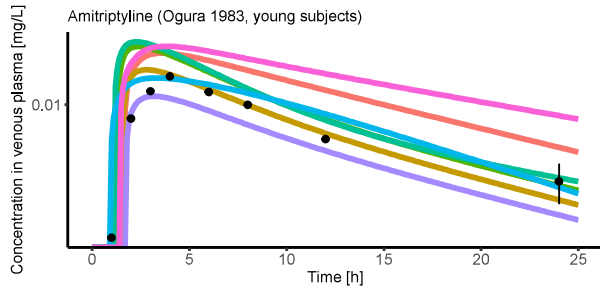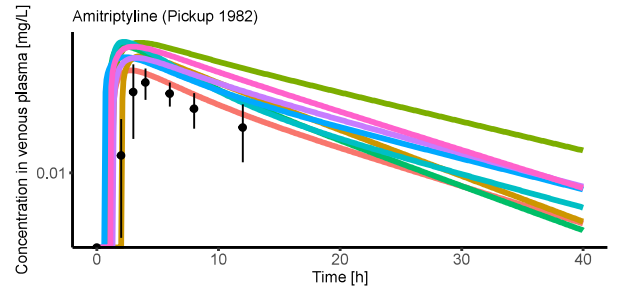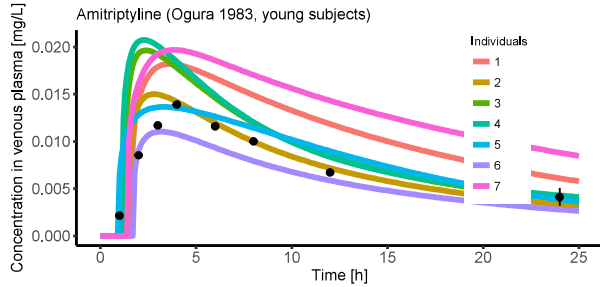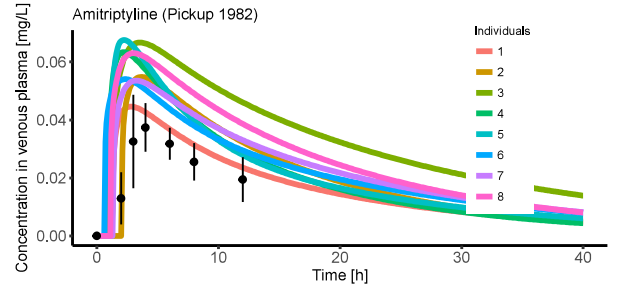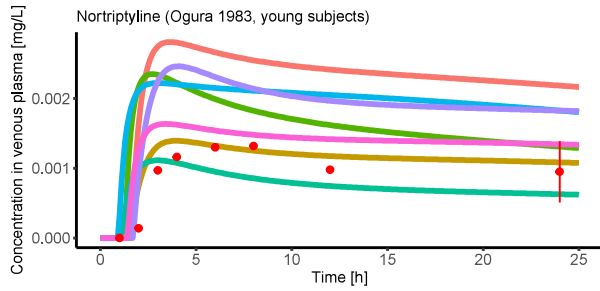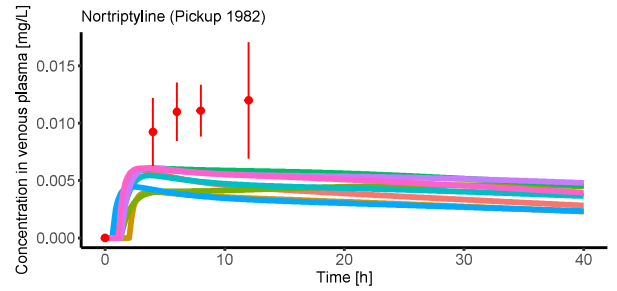

Q

R

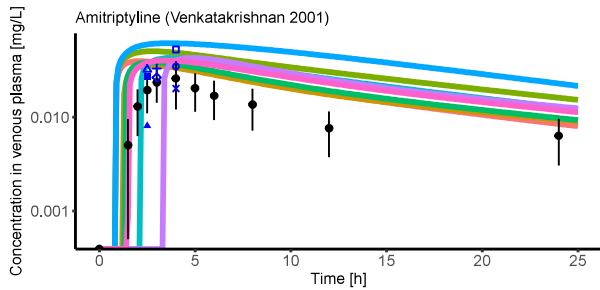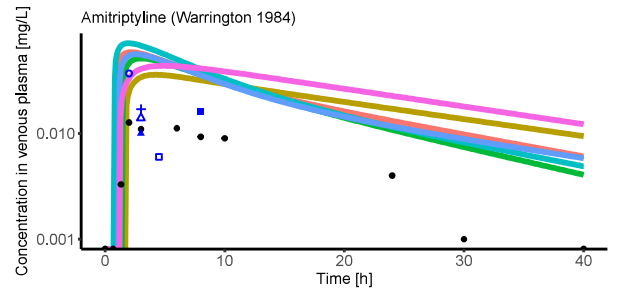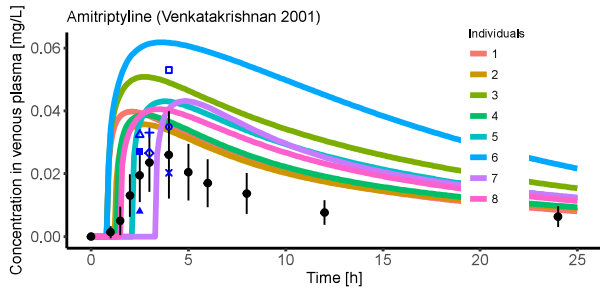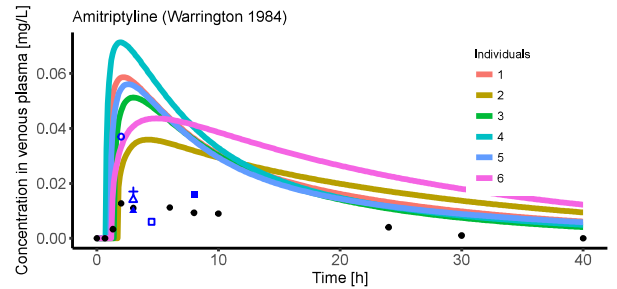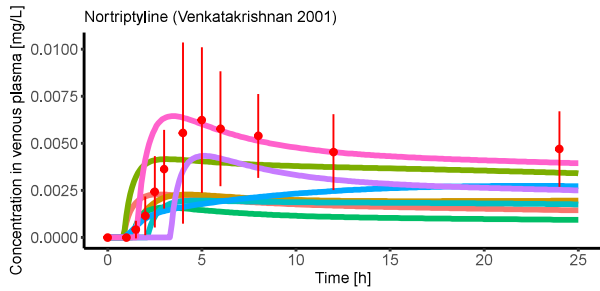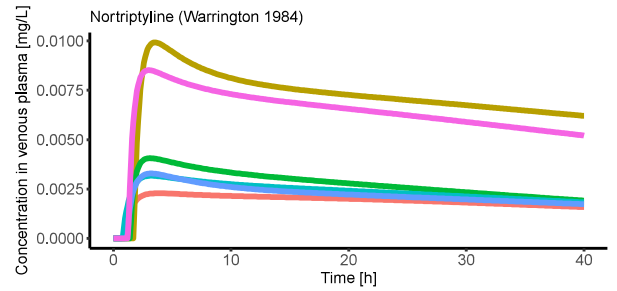

S

T

Figure 1 - Continued

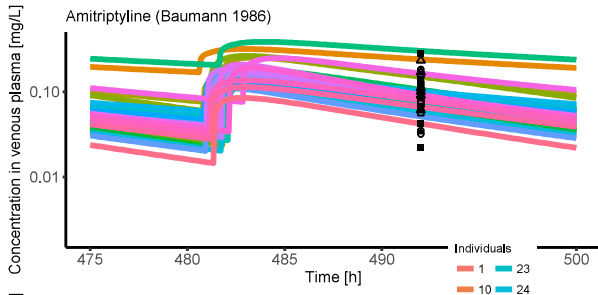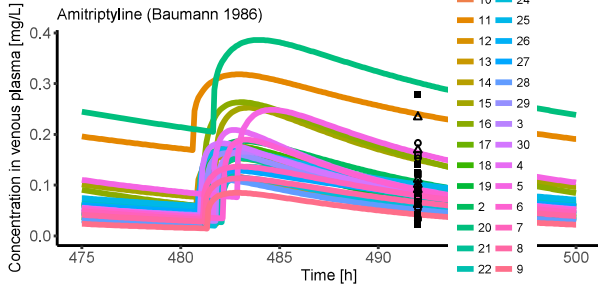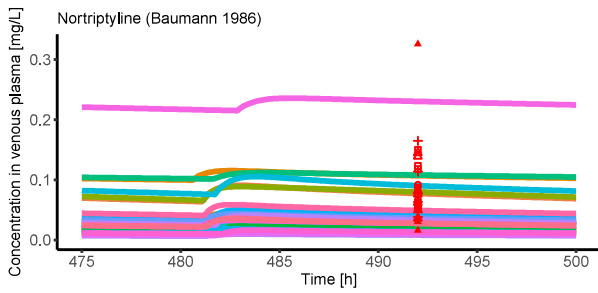

U

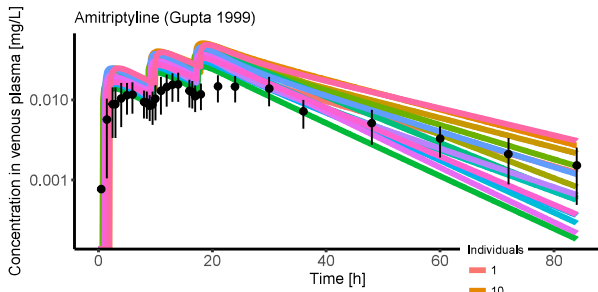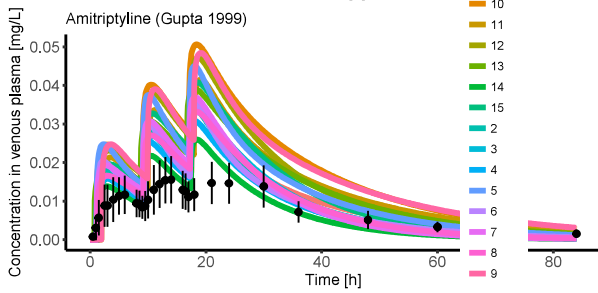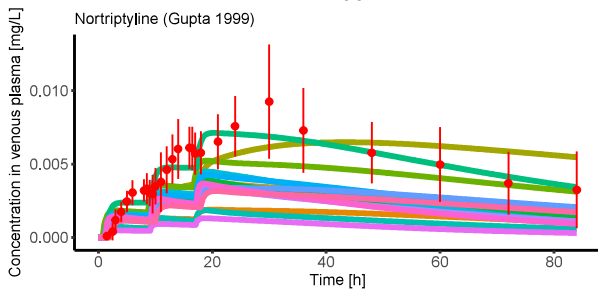

W

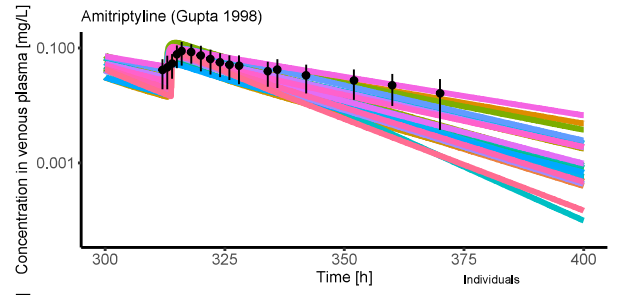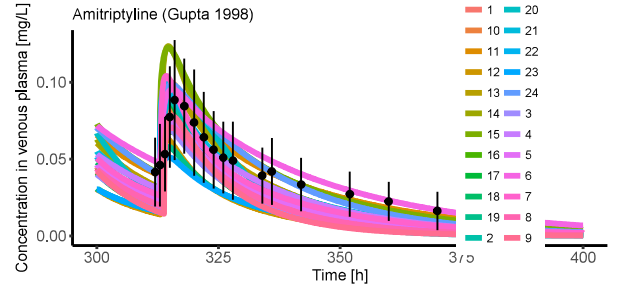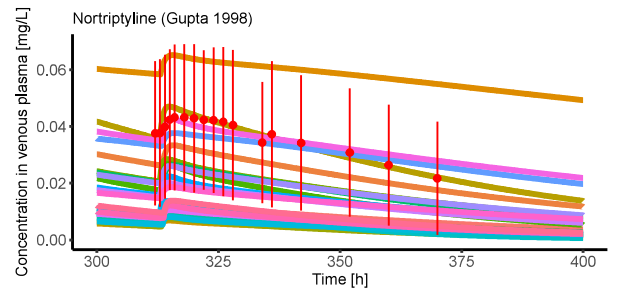

V

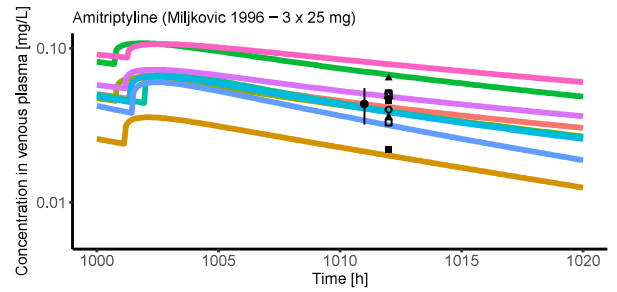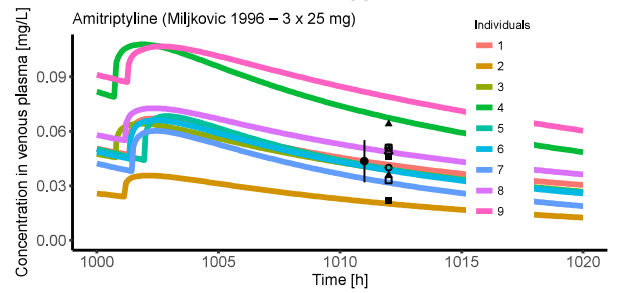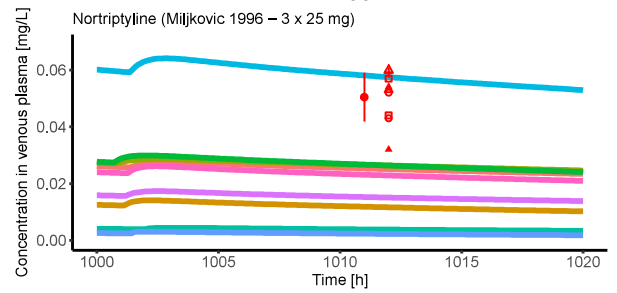

X

Figure 1 - Continued

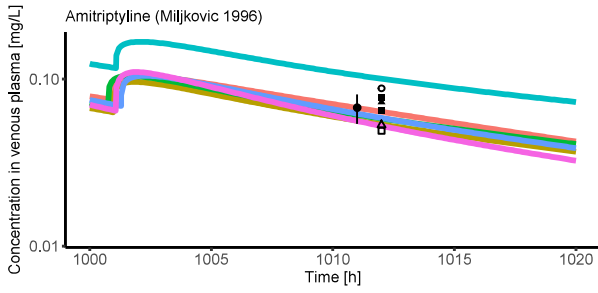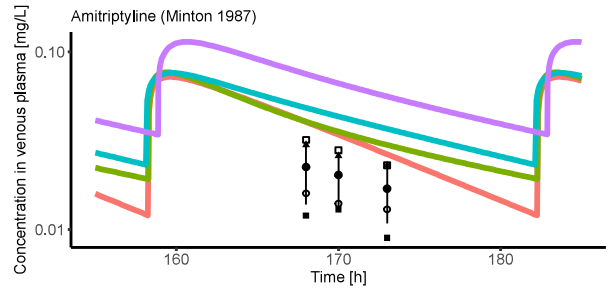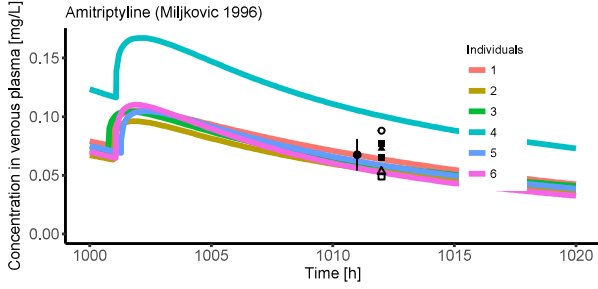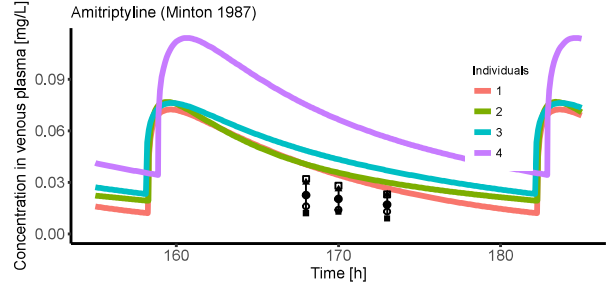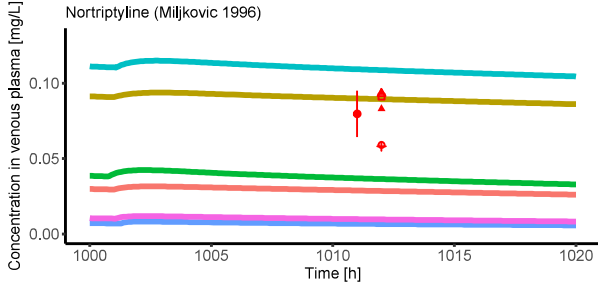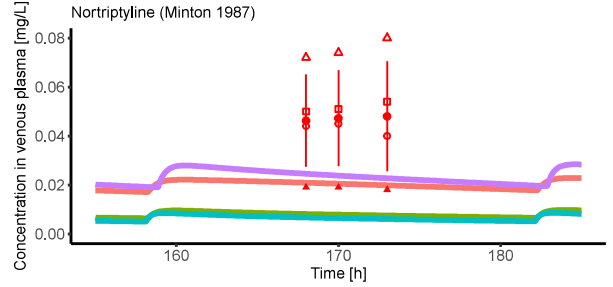

Y

Z

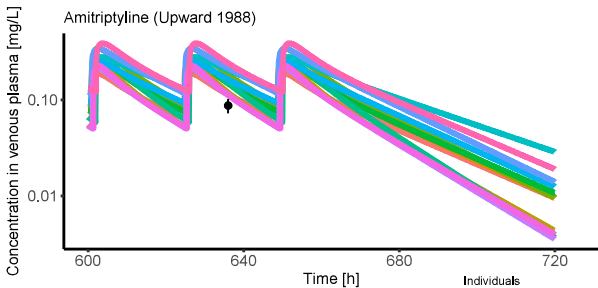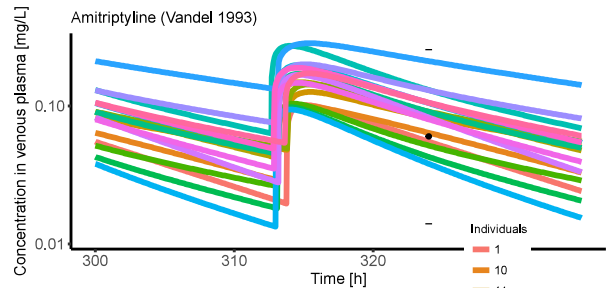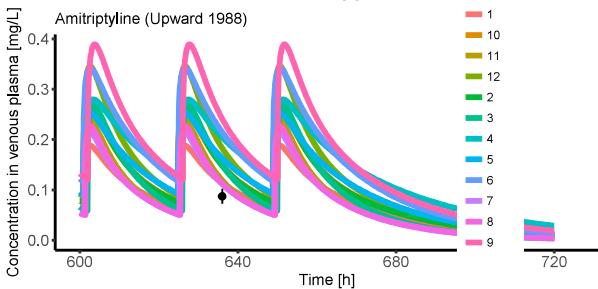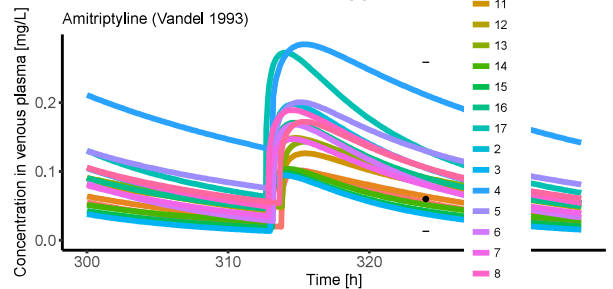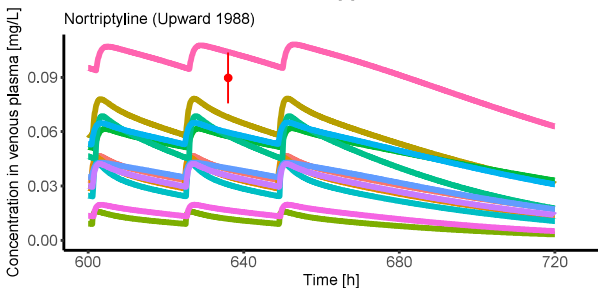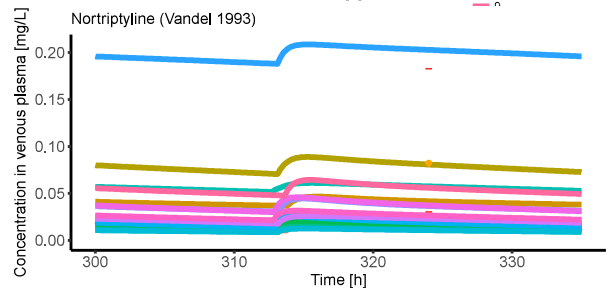

AA

AB

Figure 1 - Continued

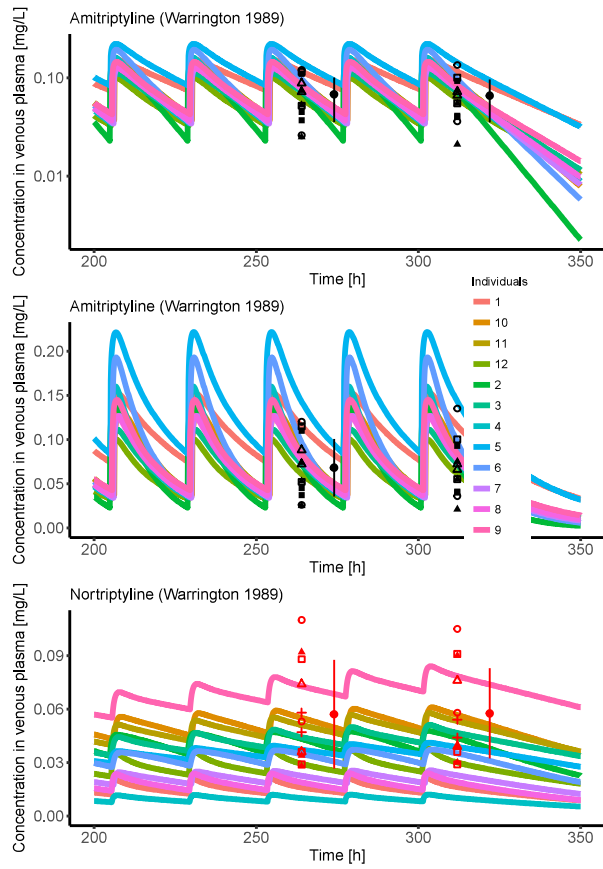

AC

Figure 2 - The PK simulations' results of cases of AT intoxication (continued on nextpage).

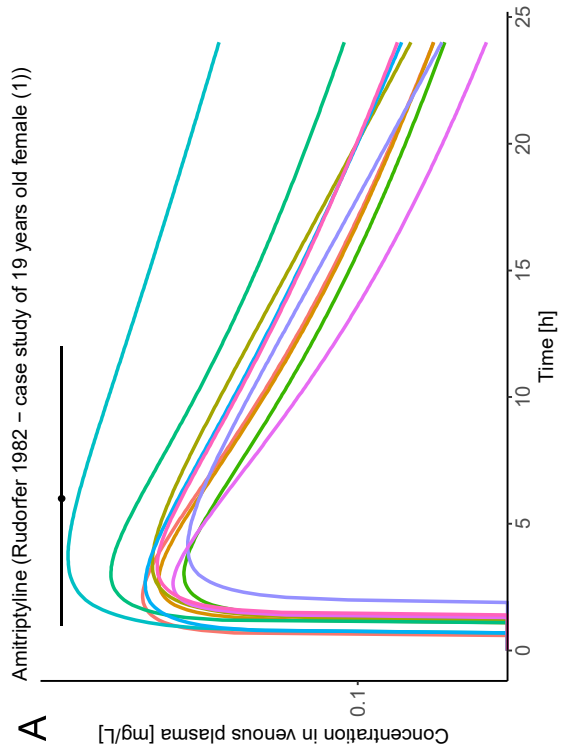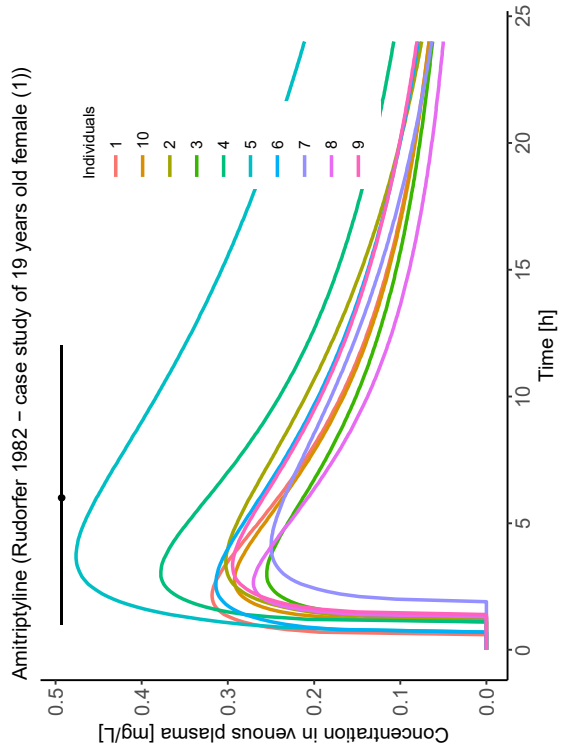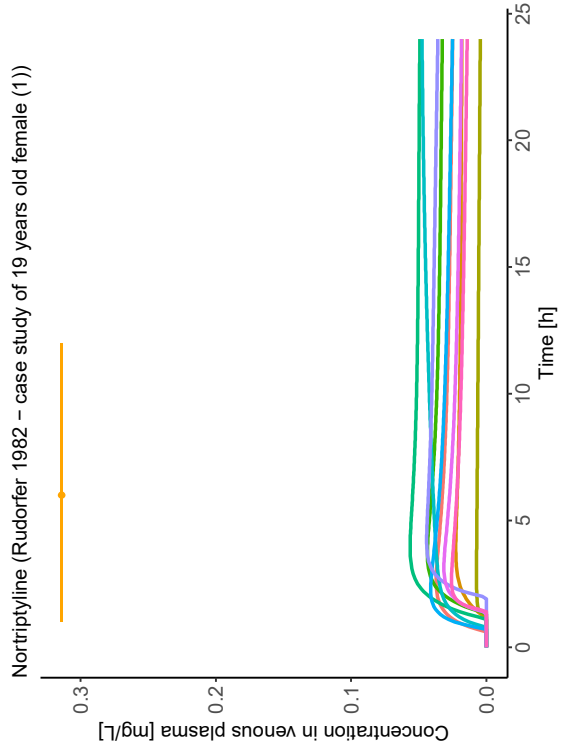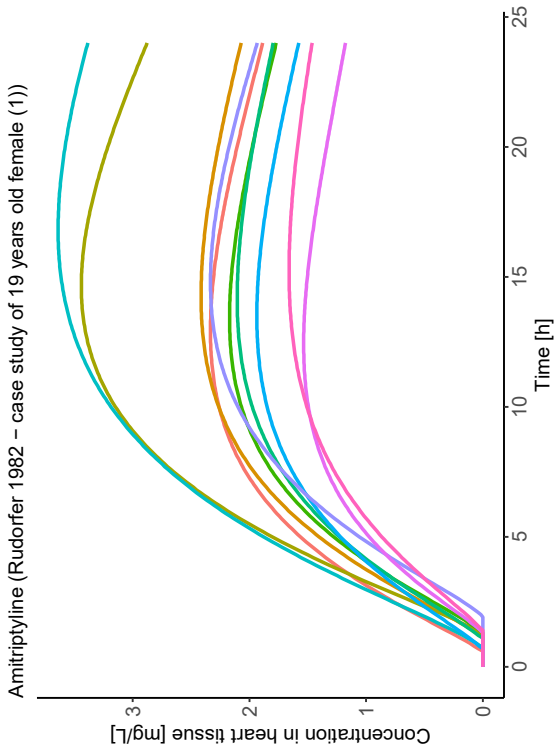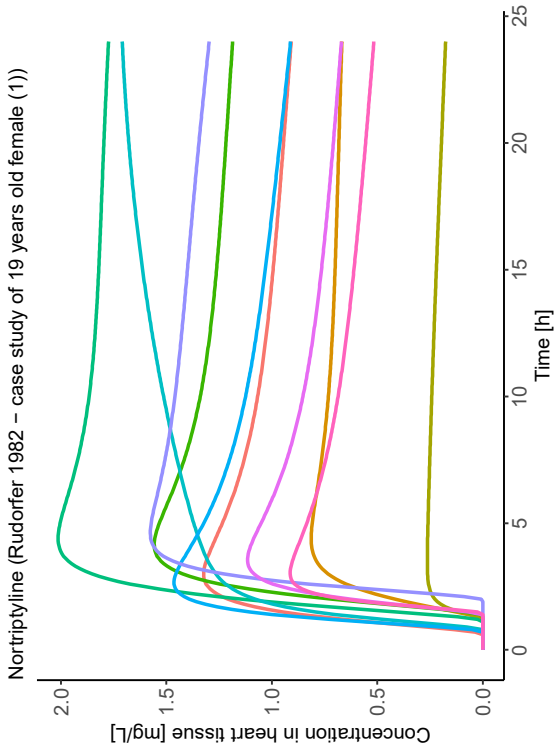



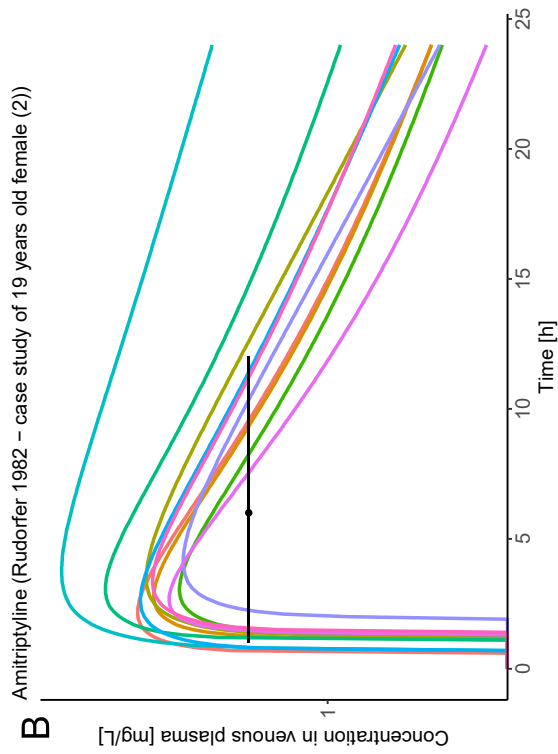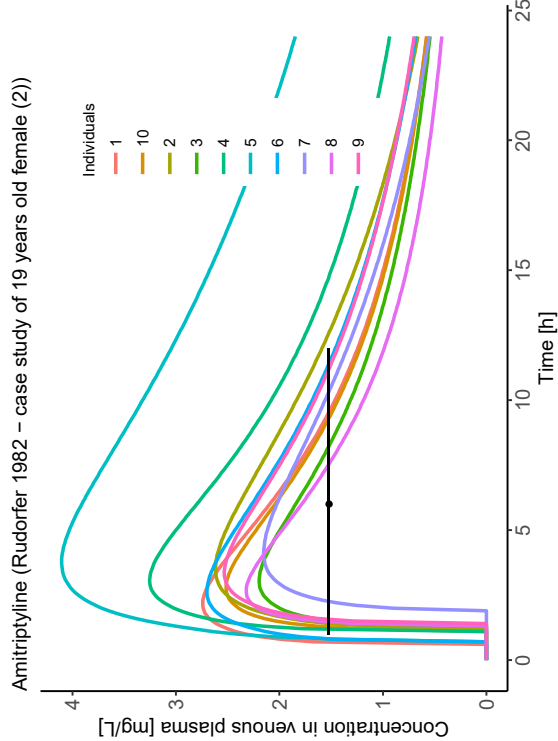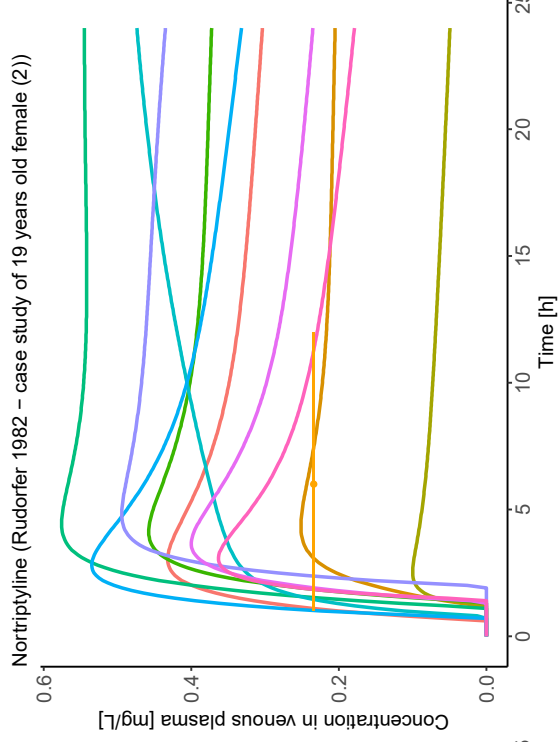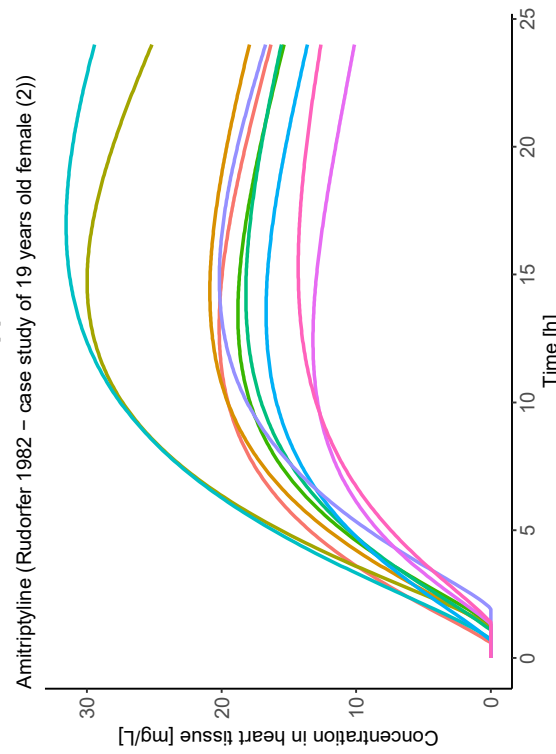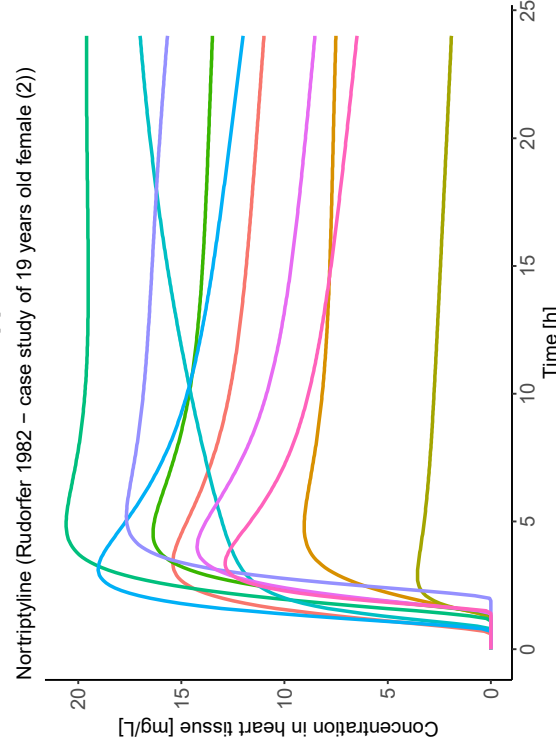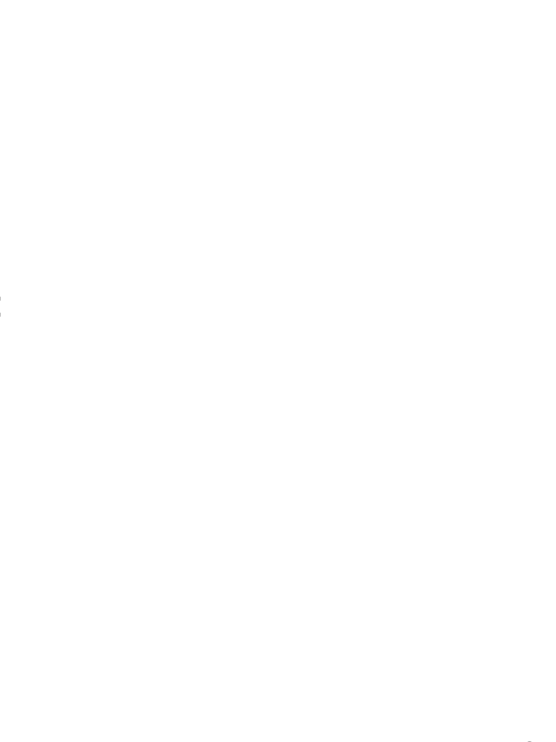

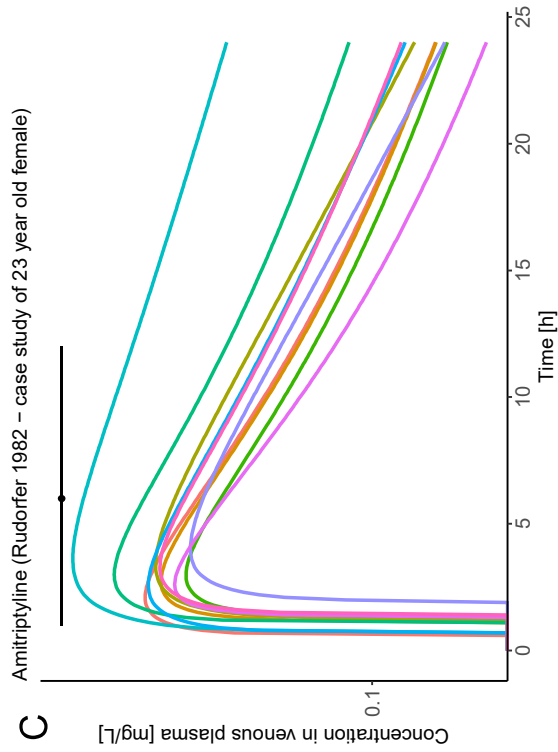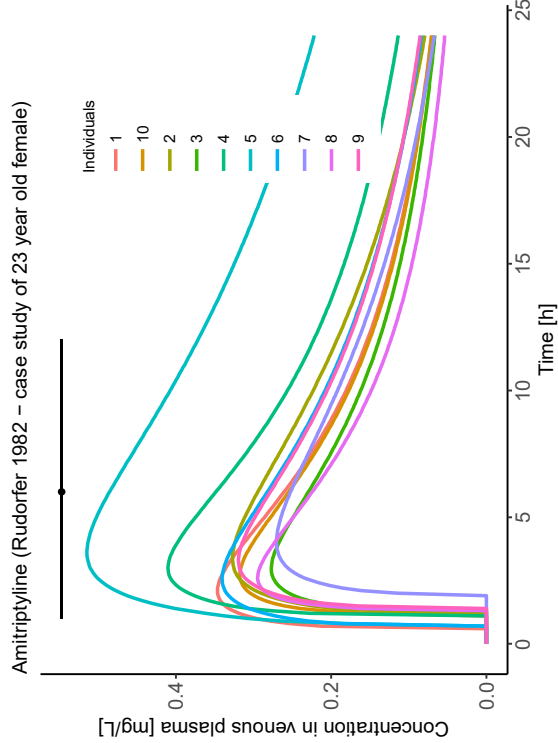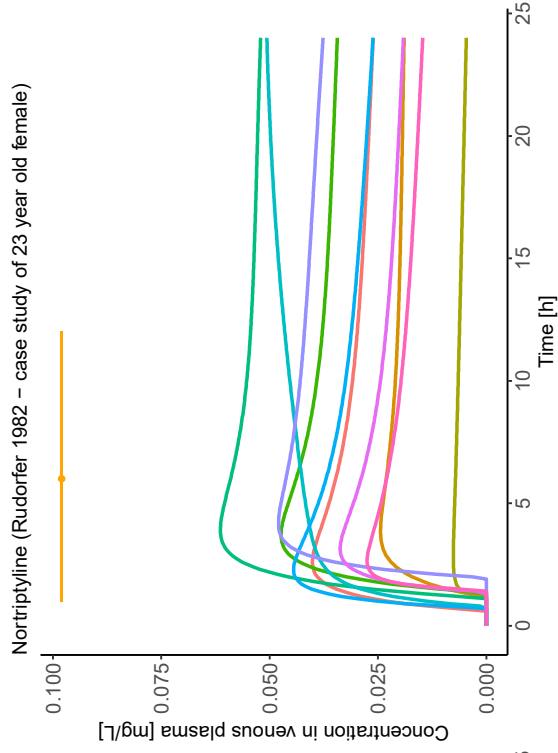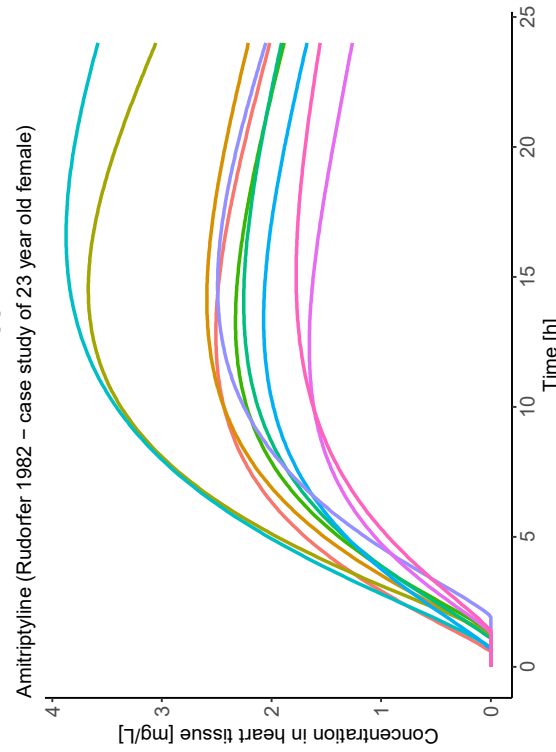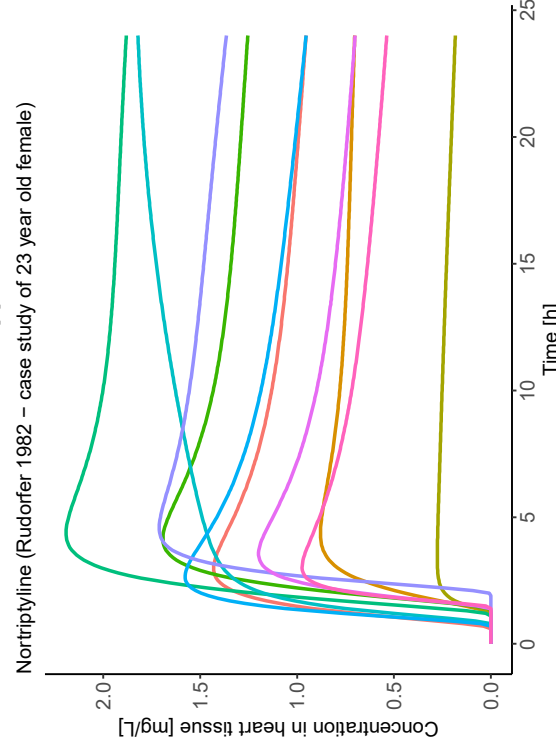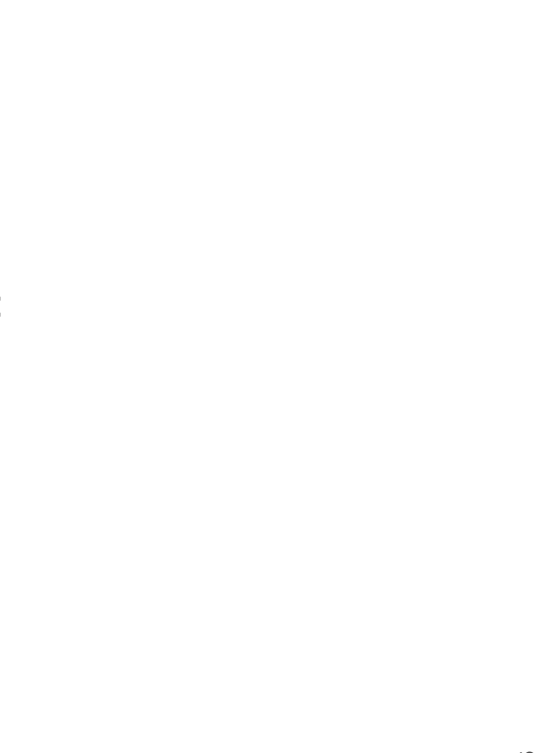

**D** Amitriptyline (Rudorfer 1982 - case study of 29 years old female (1))

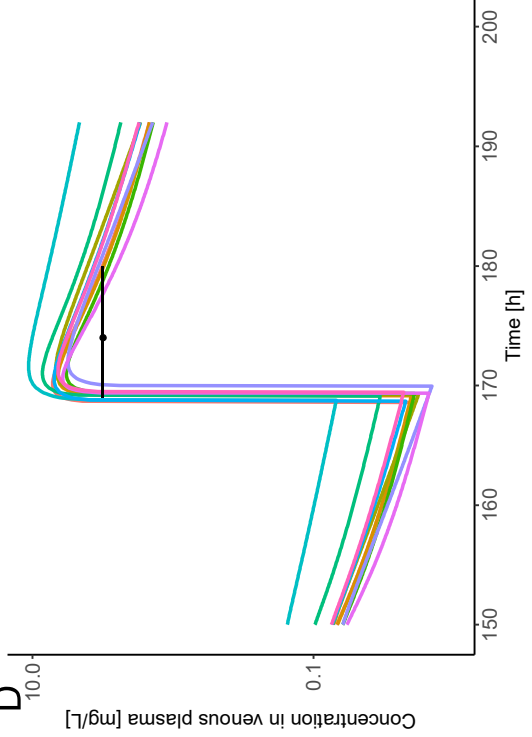

Amitriptyline (Rudorfer 1982 - case study of 29 years old female (1))

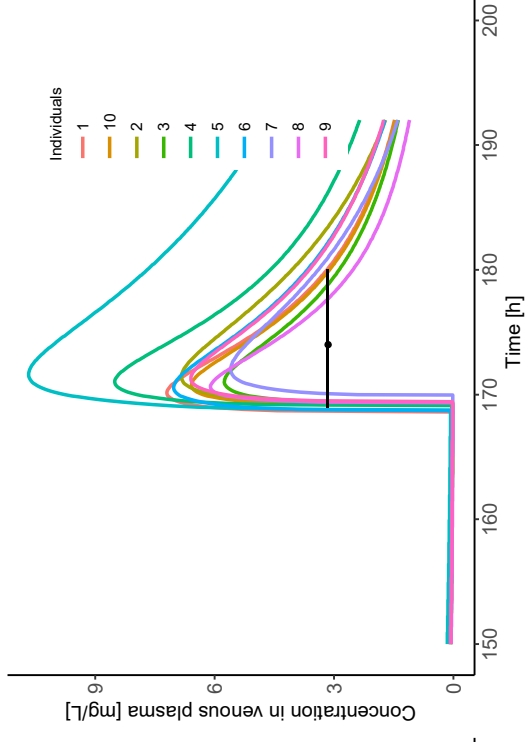

Nortriptyline (Rudorfer 1982 - case study of 29 years old female (1))

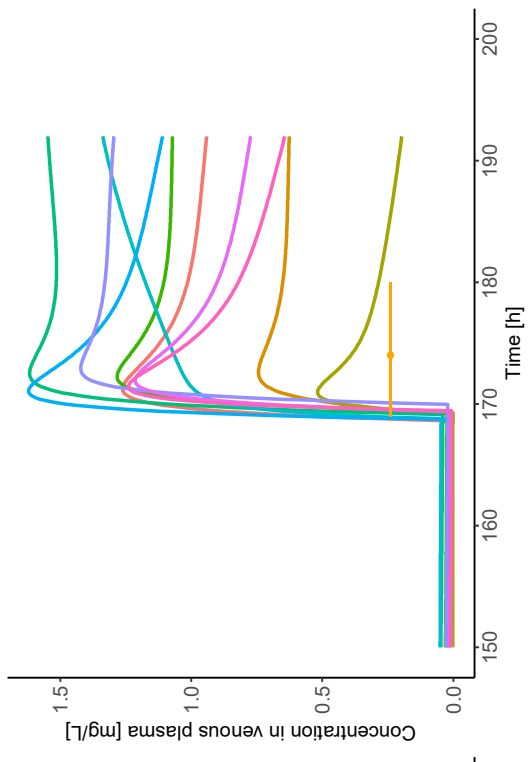

Amitriptyline (Rudorfer 1982 - case study of 29 years old female (1))

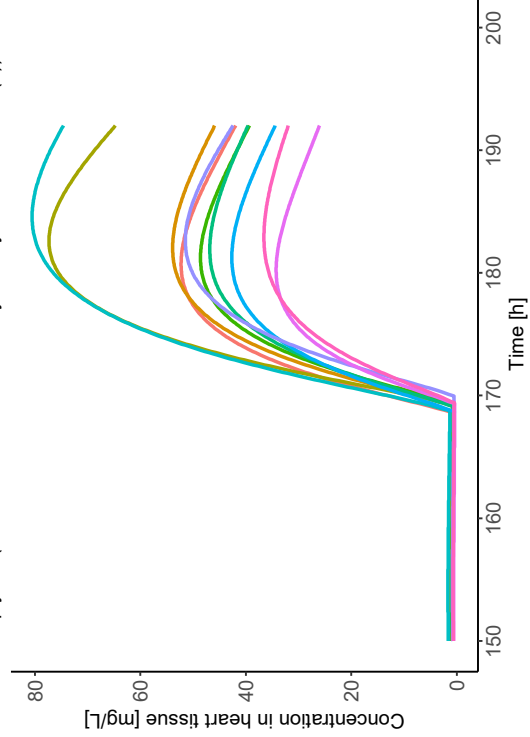

Nortriptyline (Rudorfer 1982 - case study of 29 years old female (1))

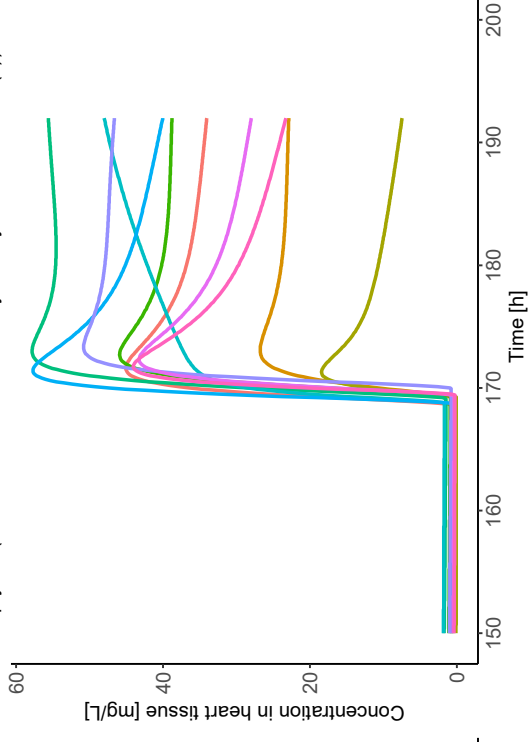

**E** Amitriptyline (Rudorfer 1982 - case study of 29 years old female (2))

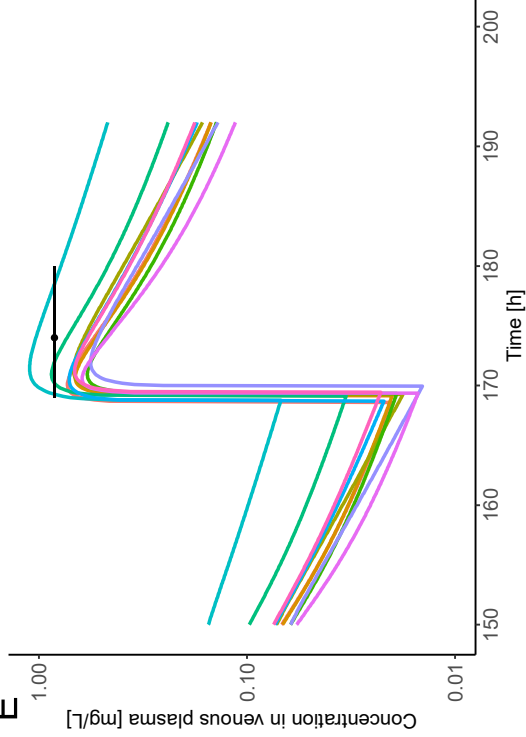

Amitriptyline (Rudorfer 1982 - case study of 29 years old female (2))

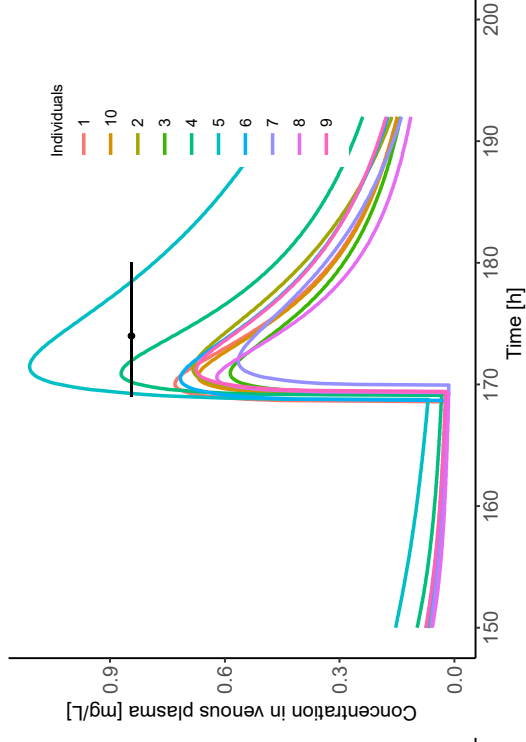

Nortriptyline (Rudorfer 1982 - case study of 29 years old female (2))

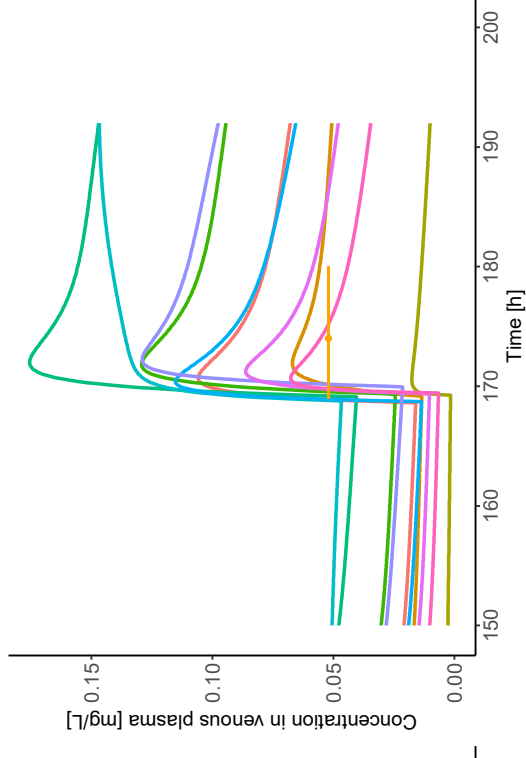

Amitriptyline (Rudorfer 1982 - case study of 29 years old female (2))

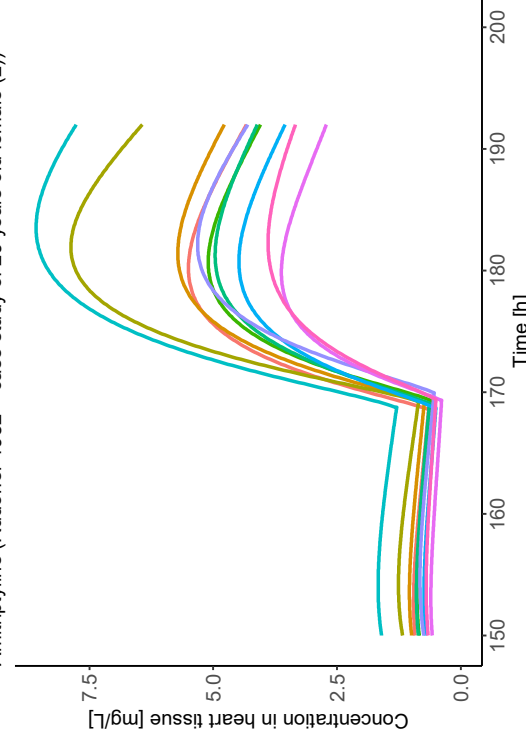

Nortriptyline (Rudorfer 1982 - case study of 29 years old female (2))

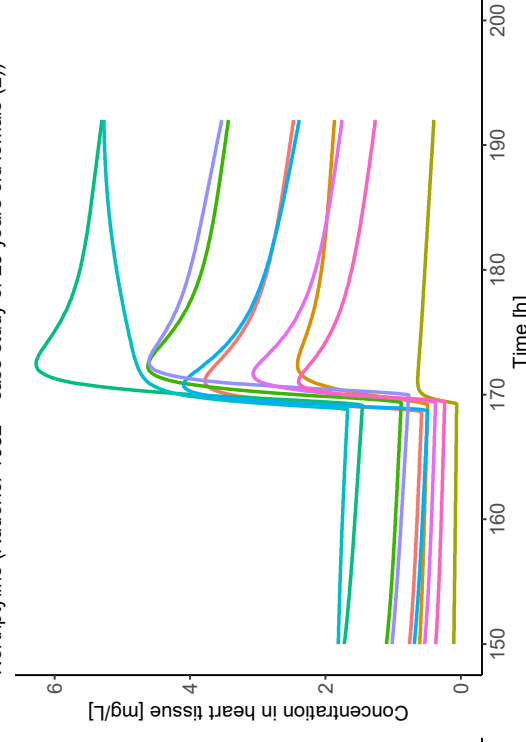

**F** Amitriptyline (Rudorfer 1982 – case study of 32 year old female)

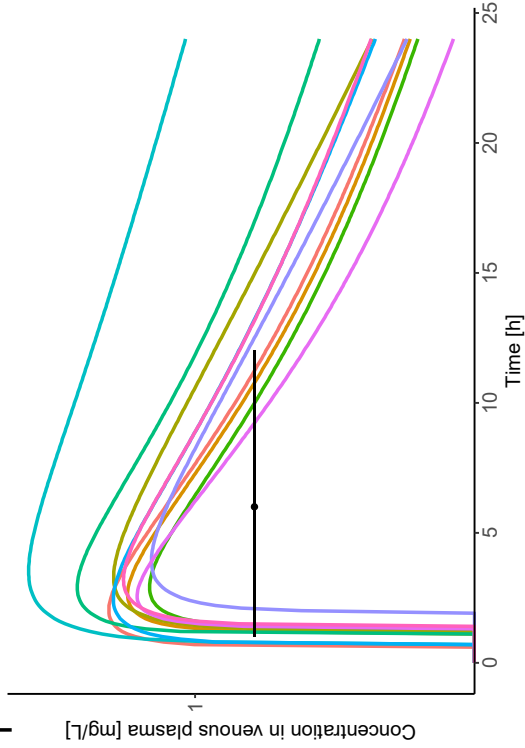

Amitriptyline (Rudorfer 1982 – case study of 32 year old female)

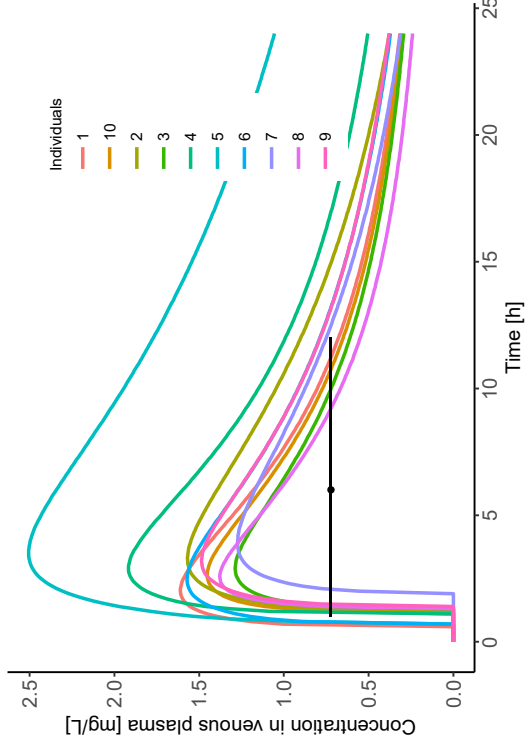

Nortriptyline (Rudorfer 1982 – case study of 32 year old female)

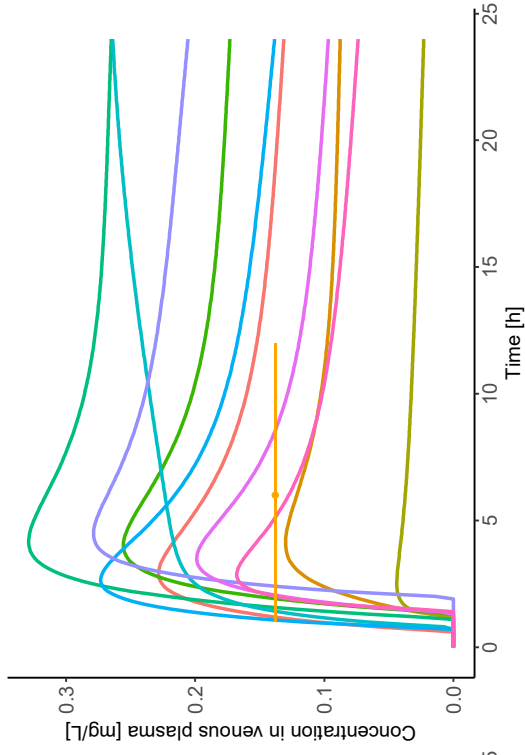

Amitriptyline (Rudorfer 1982 – case study of 32 year old female)

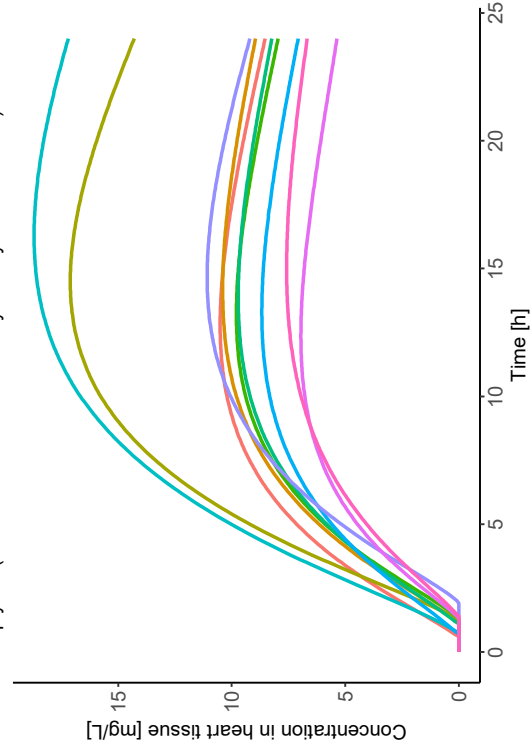

Nortriptyline (Rudorfer 1982 – case study of 32 year old female)

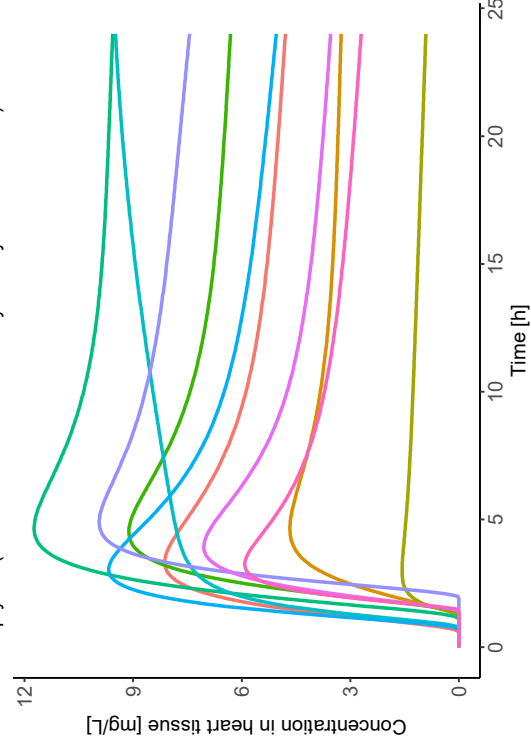

**G** Amitriptyline (Rudorfer 1982 – case study of 39 year old female)

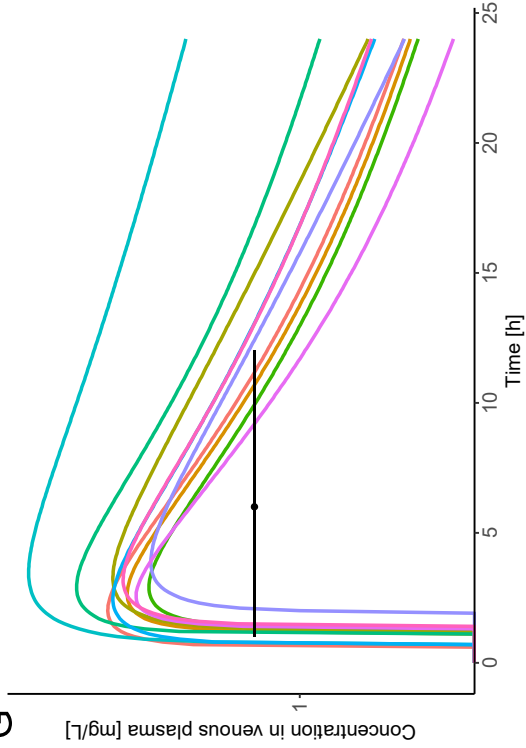

Amitriptyline (Rudorfer 1982 – case study of 39 year old female)

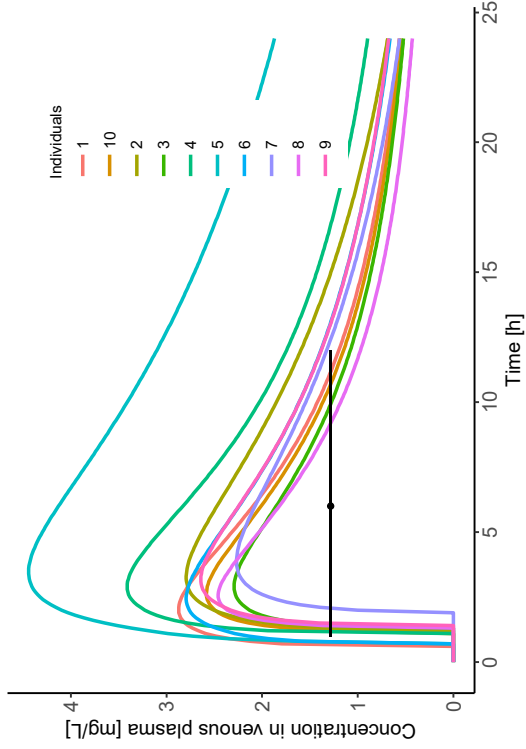

Nortriptyline (Rudorfer 1982 – case study of 39 year old female)

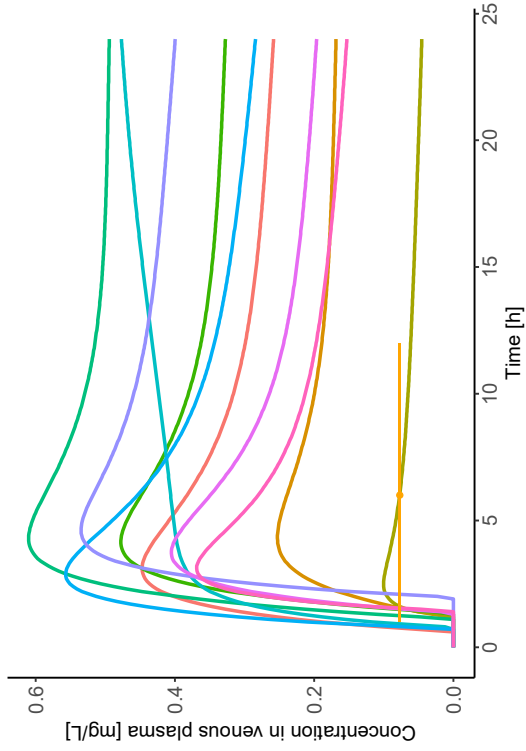

Amitriptyline (Rudorfer 1982 – case study of 39 year old female)

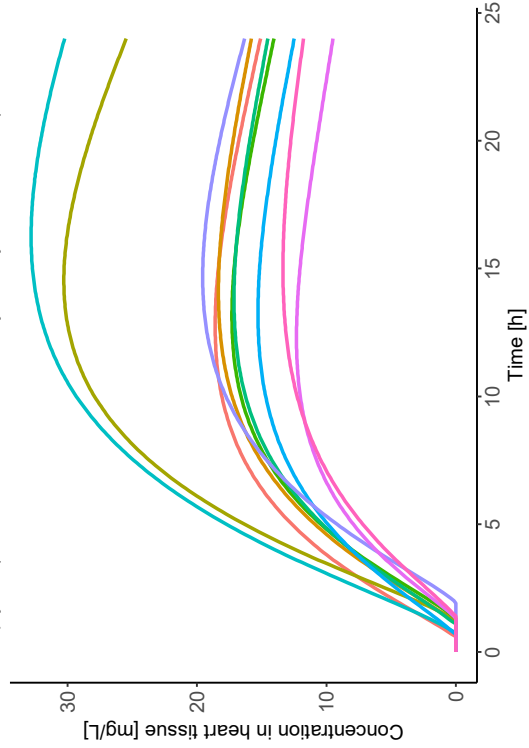

Nortriptyline (Rudorfer 1982 – case study of 39 year old female)

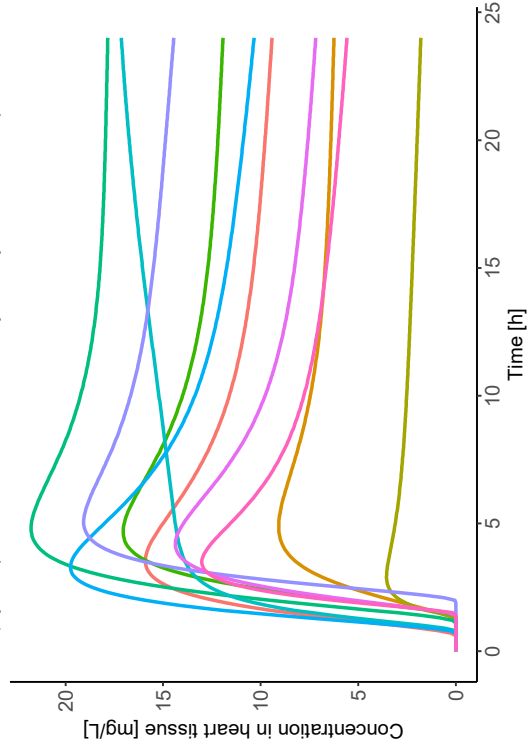

H Amitriptyline (Rudorfer 1982 - case study of 67 years old female )

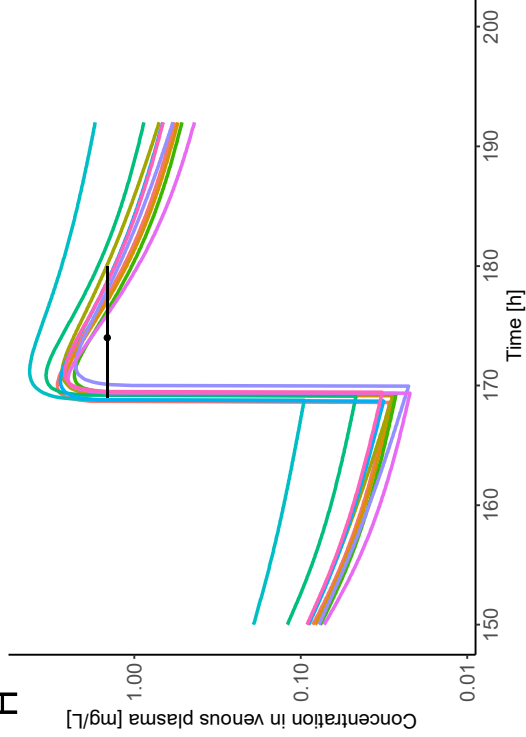

Amitriptyline (Rudorfer 1982 - case study of 67 years old female )

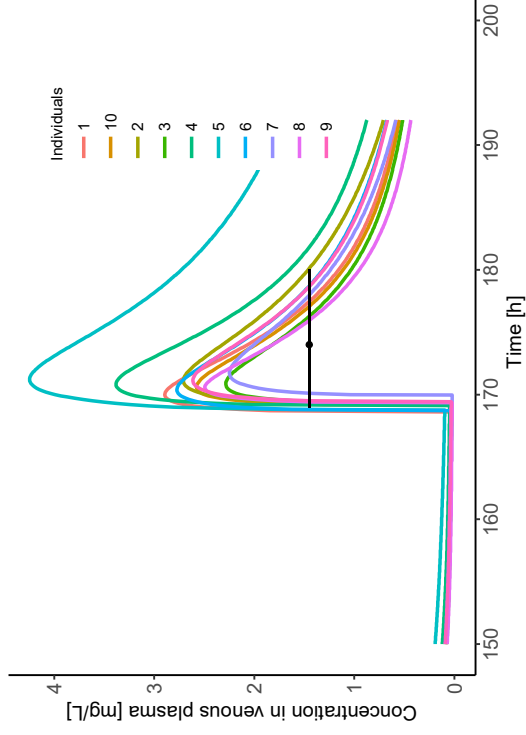

Nortriptyline (Rudorfer 1982 - case study of 67 years old female )

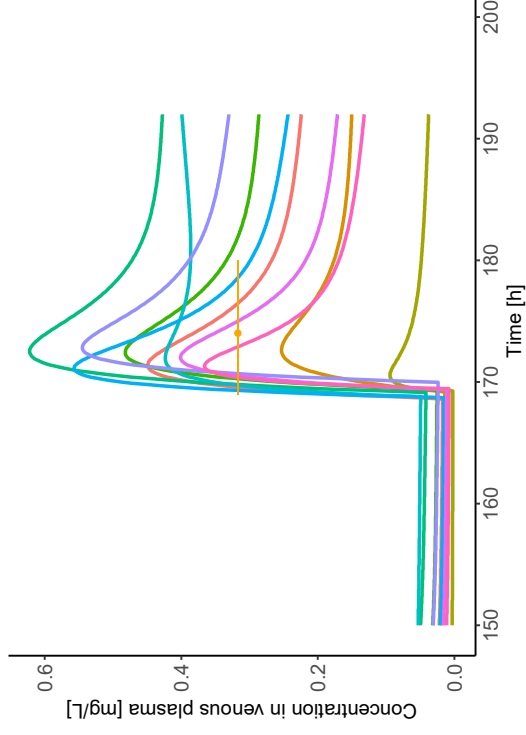

Amitriptyline (Rudorfer 1982 - case study of 67 years old female )

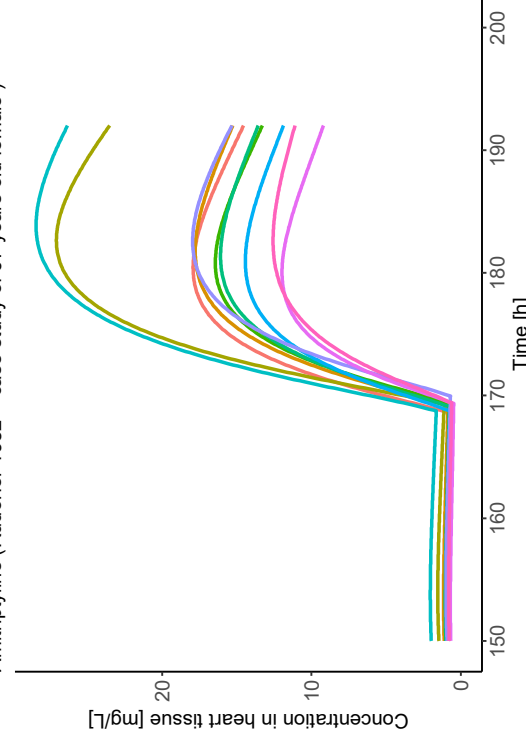

Nortriptyline (Rudorfer 1982 - case study of 67 years old female )

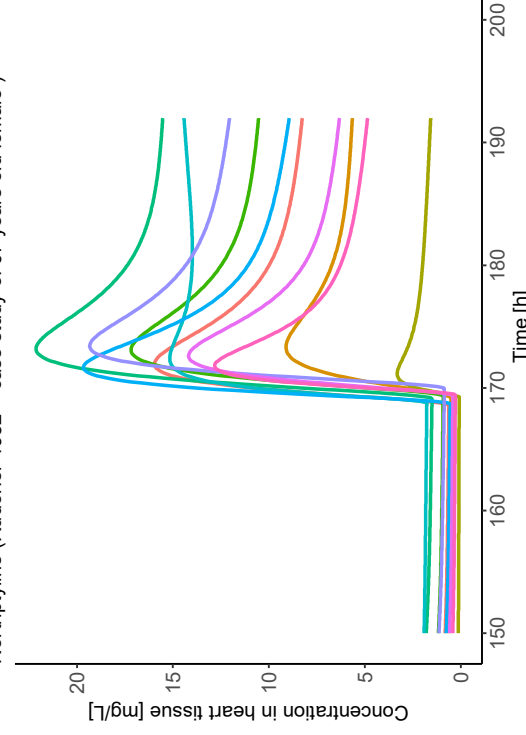

Amitriptyline (Rudorfer 1982 - case study of 17 years old male)

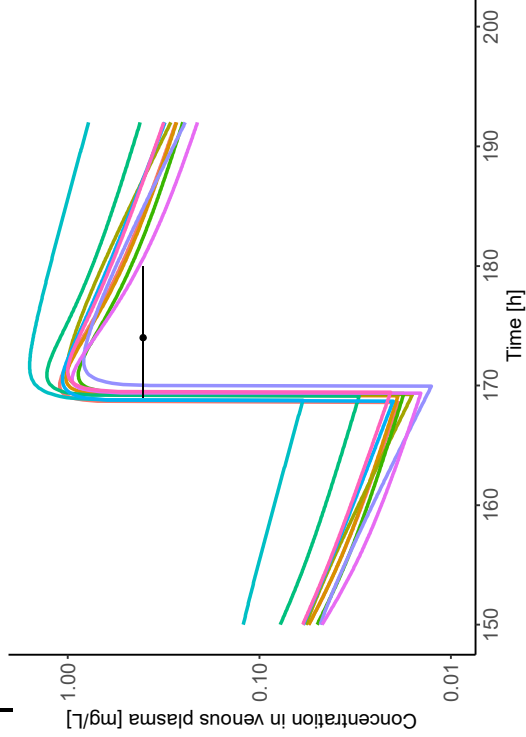

Amitriptyline (Rudorfer 1982 - case study of 17 years old male)

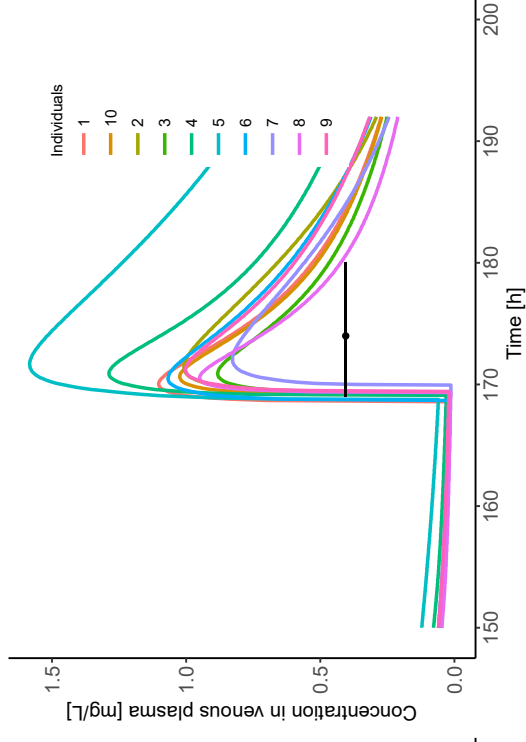

Nortriptyline (Rudorfer 1982 - case study of 17 years old male)

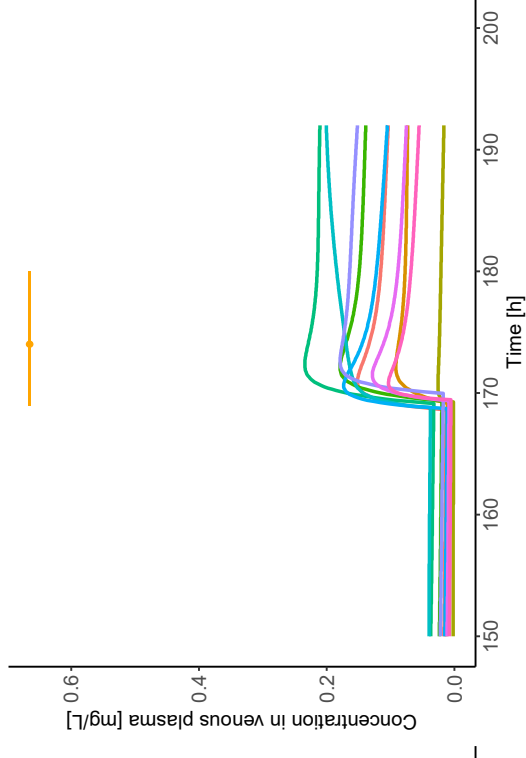

Amitriptyline (Rudorfer 1982 - case study of 17 years old male)

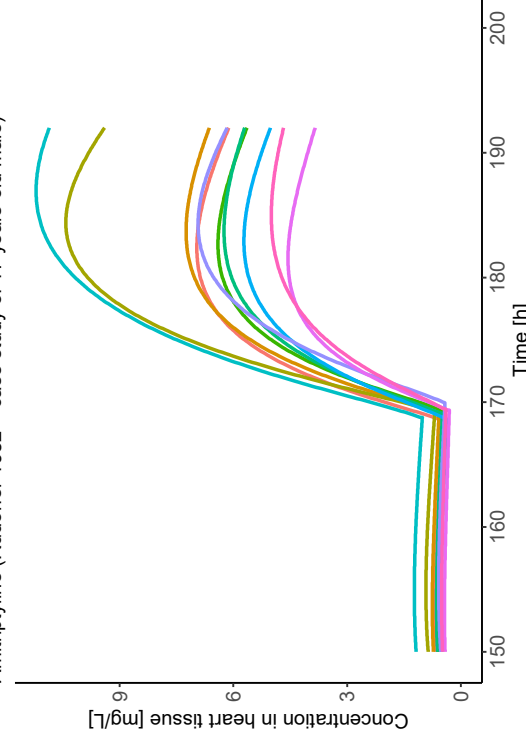

Nortriptyline (Rudorfer 1982 - case study of 17 years old male)

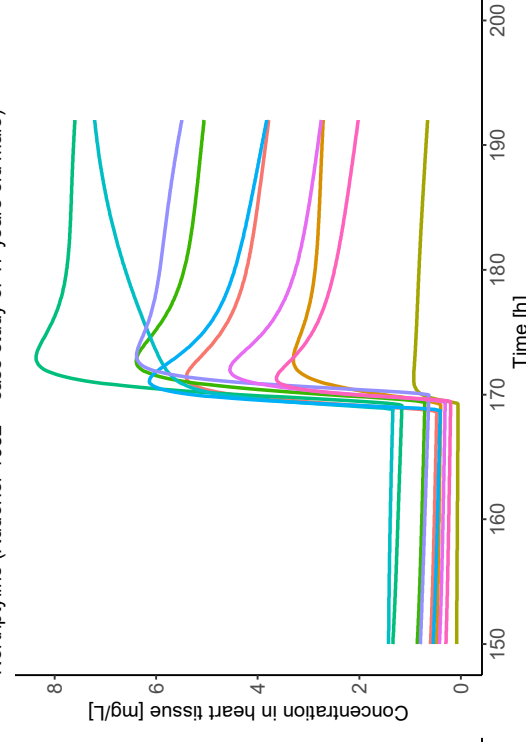



**J** Amitriptyline (Rudorfer 1982 - case study of 22 year old male)

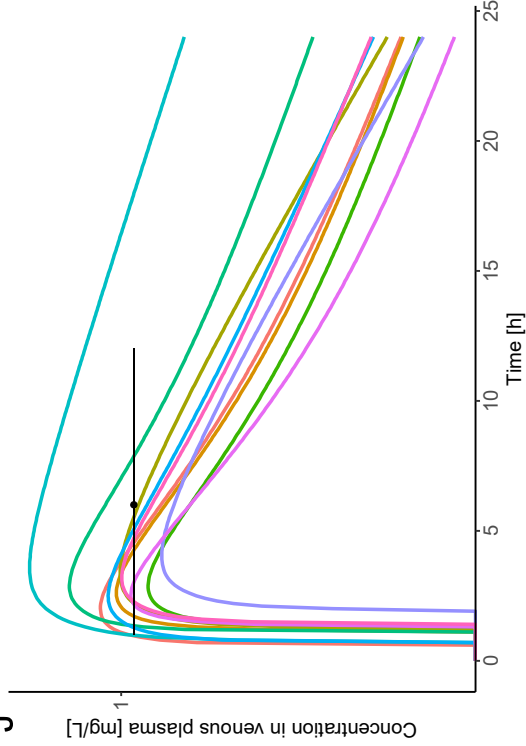

Amitriptyline (Rudorfer 1982 - case study of 22 year old male)

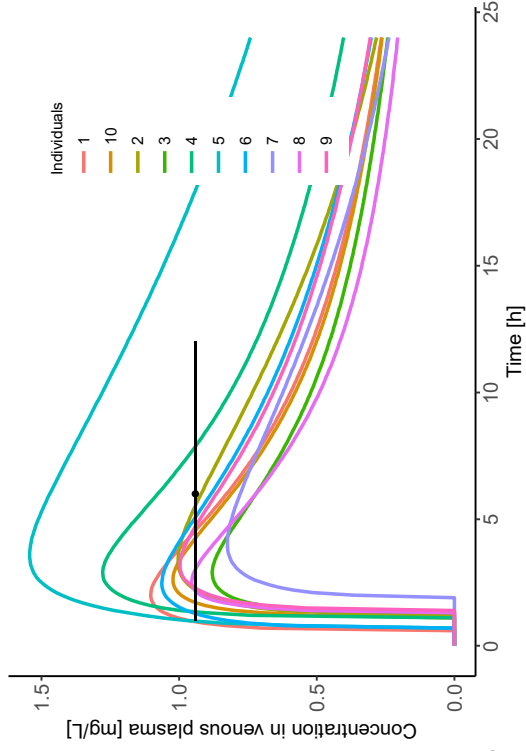

Nortriptyline (Rudorfer 1982 - case study of 22 year old male)

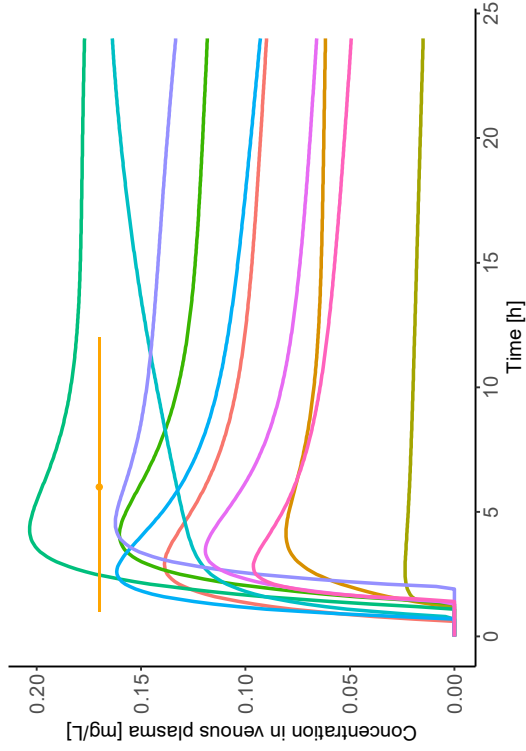

Amitriptyline (Rudorfer 1982 - case study of 22 year old male)

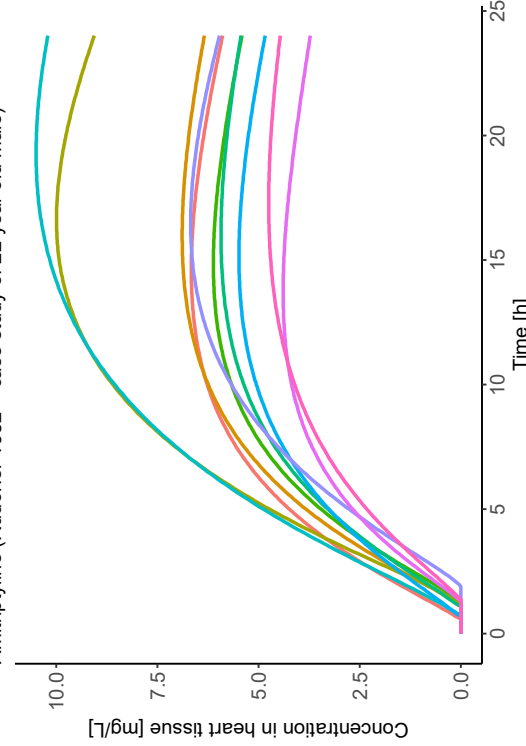

Nortriptyline (Rudorfer 1982 - case study of 22 year old male)

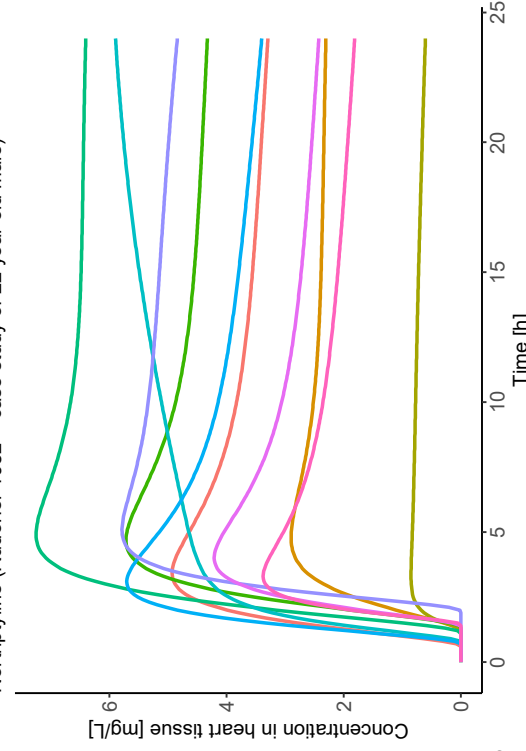

**K** Amitriptyline (Rudorfer 1982 - case study of 25 year old male (1))

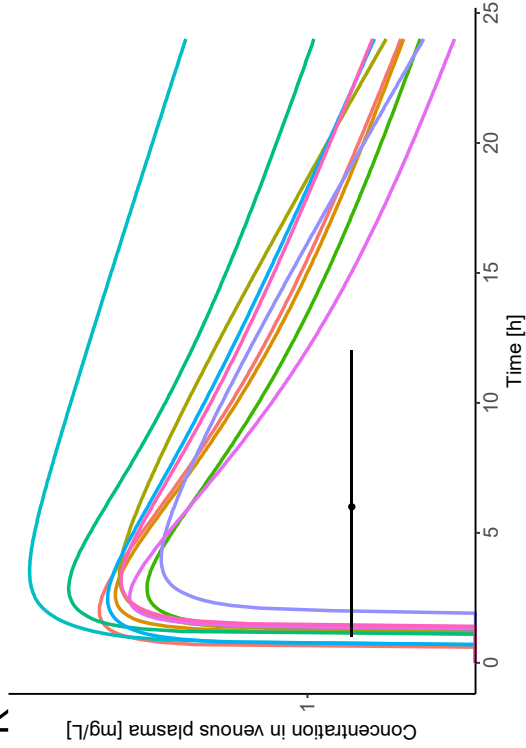

Amitriptyline (Rudorfer 1982 - case study of 25 year old male (1))

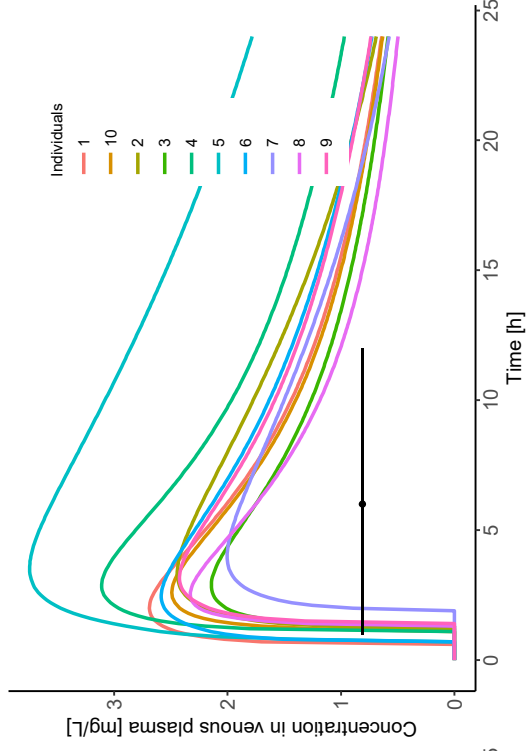

Nortriptyline (Rudorfer 1982 - case study of 25 year old male (1))

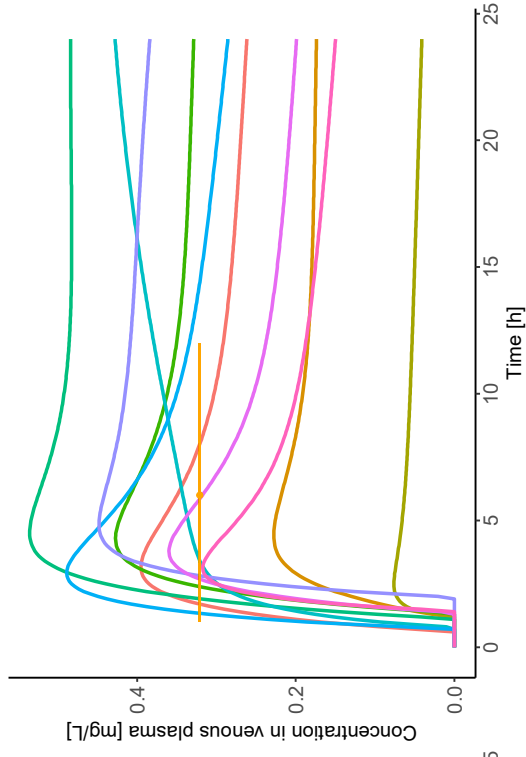

Amitriptyline (Rudorfer 1982 - case study of 25 year old male (1))

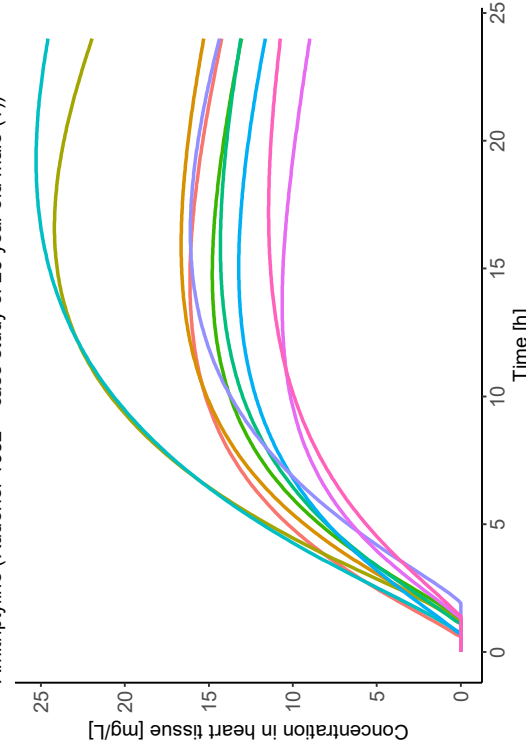

Nortriptyline (Rudorfer 1982 - case study of 25 year old male (1))

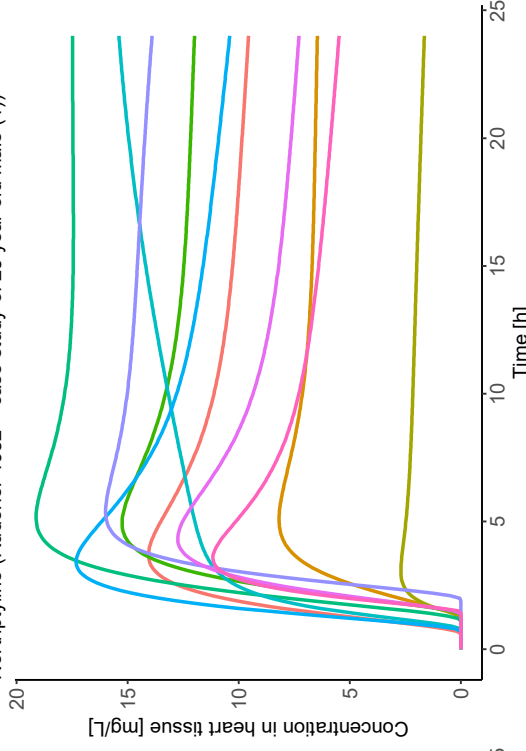

Amitriptyline (Rudorfer 1982 - case study of 25 years old male (2))

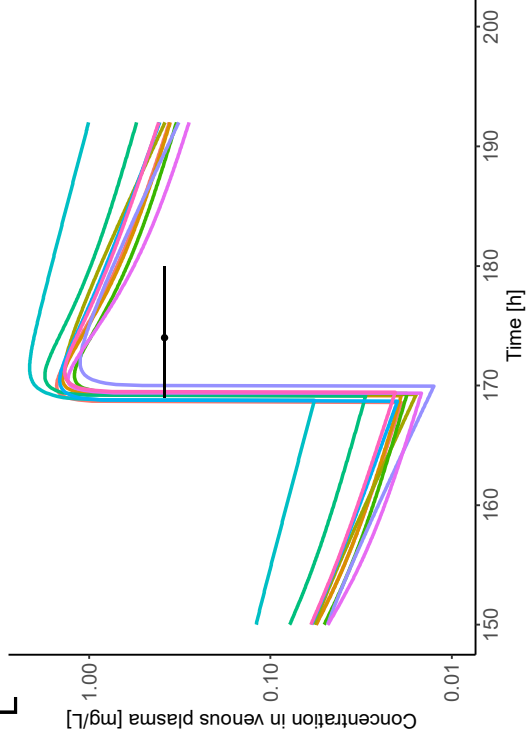

Amitriptyline (Rudorfer 1982 - case study of 25 years old male (2))

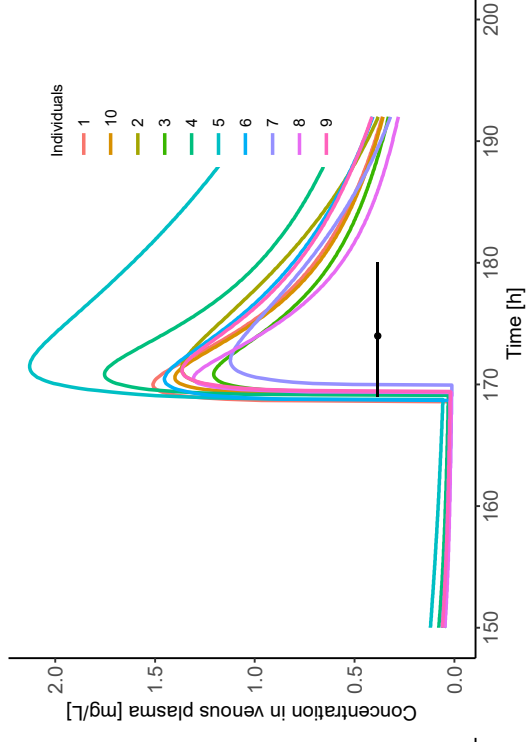

Nortriptyline (Rudorfer 1982 - case study of 25 years old male (2))

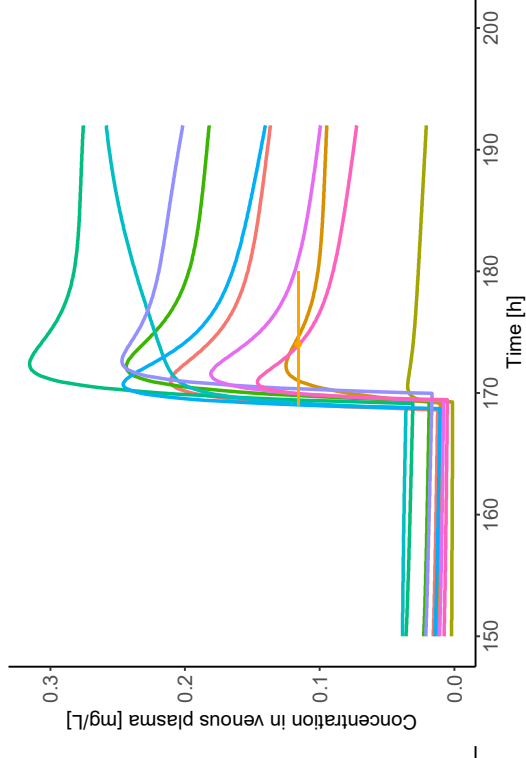

Amitriptyline (Rudorfer 1982 - case study of 25 years old male (2))

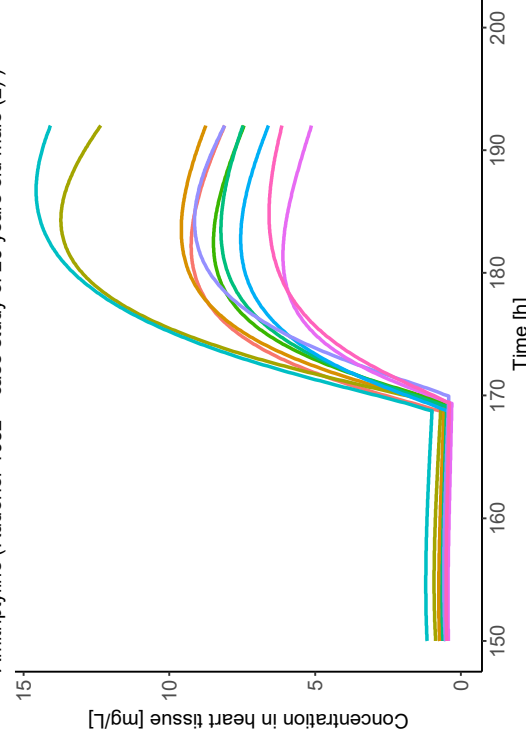

Nortriptyline (Rudorfer 1982 - case study of 25 years old male (2))

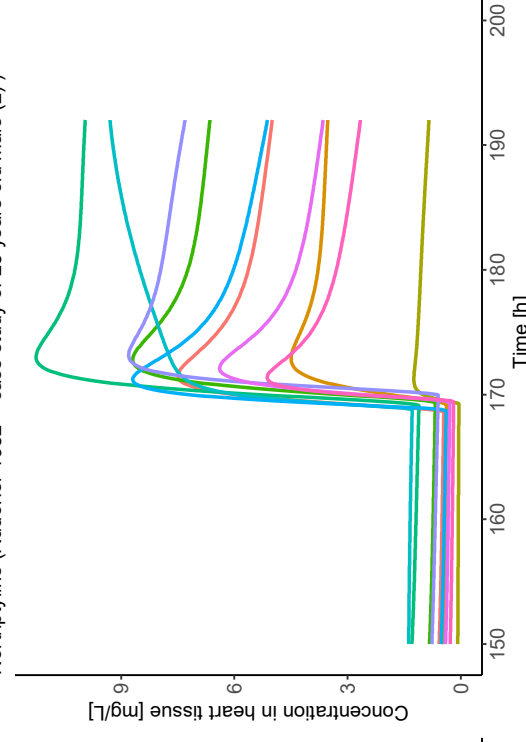

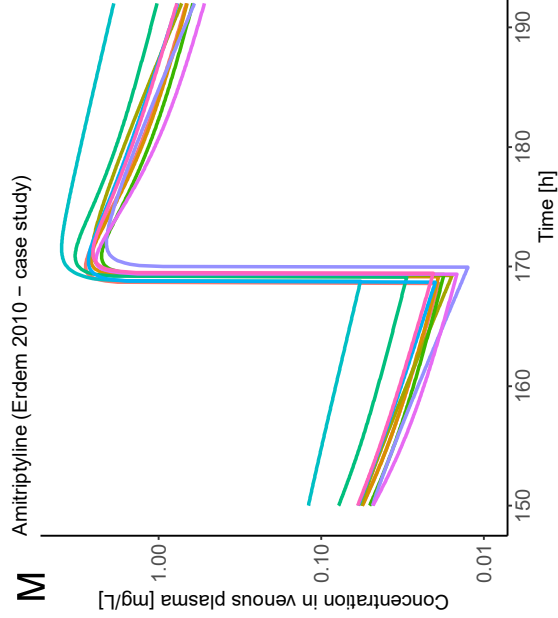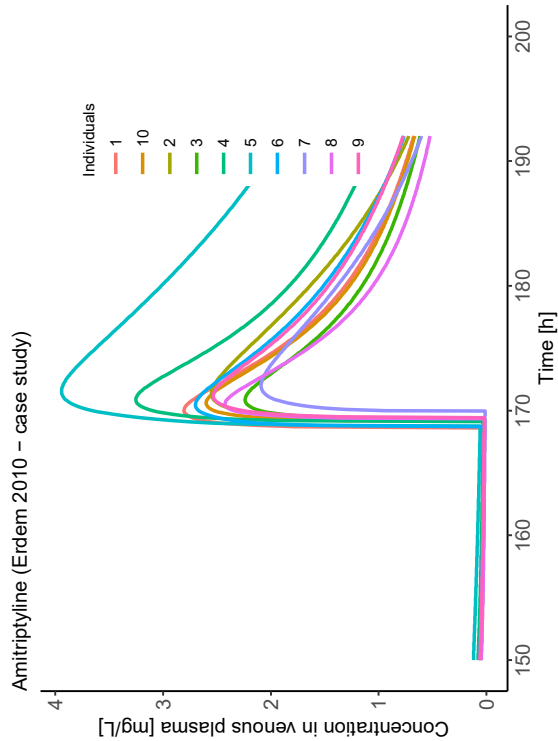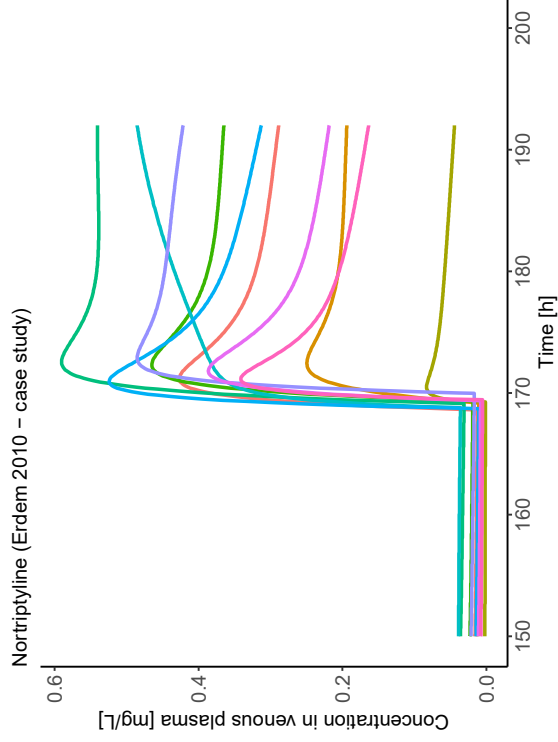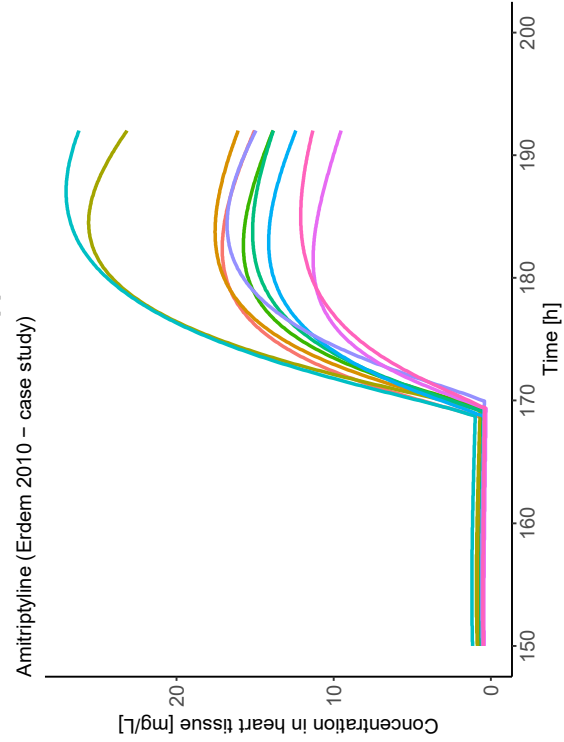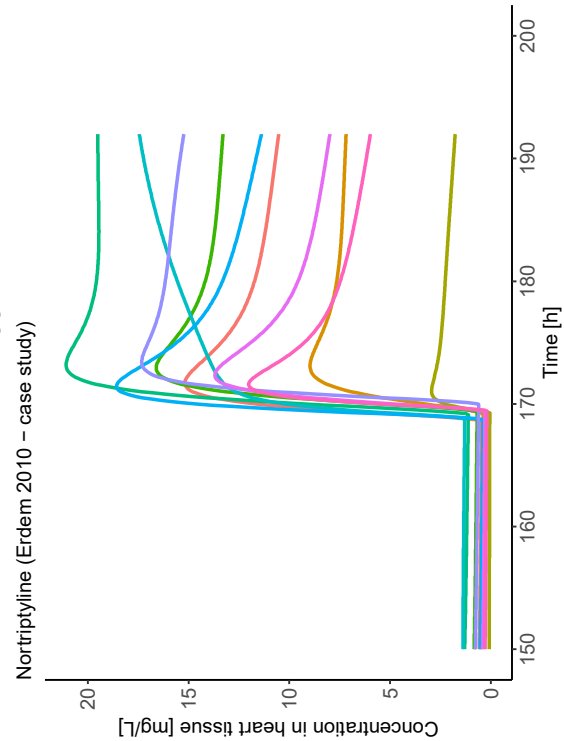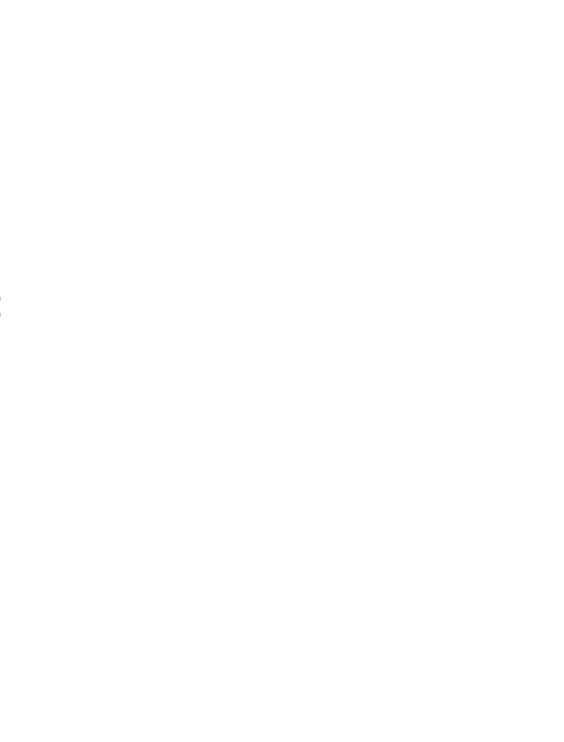

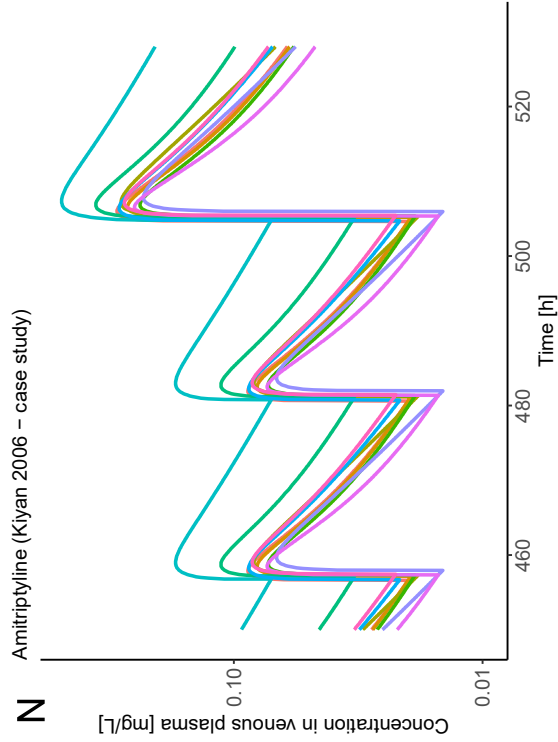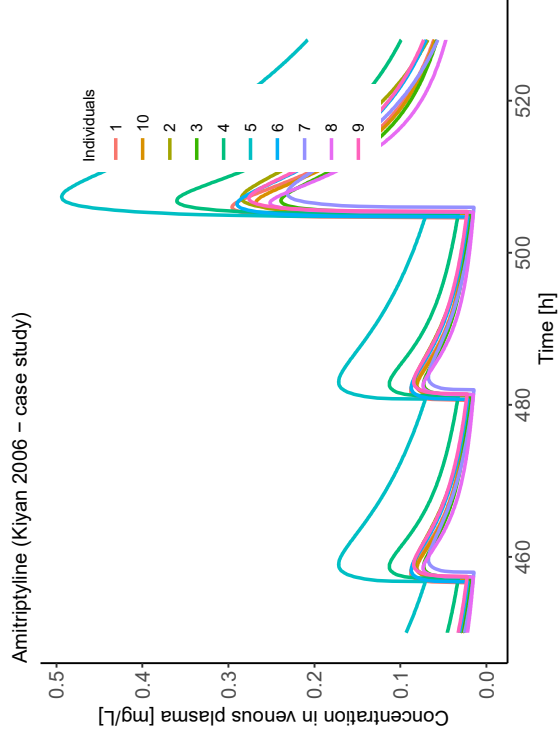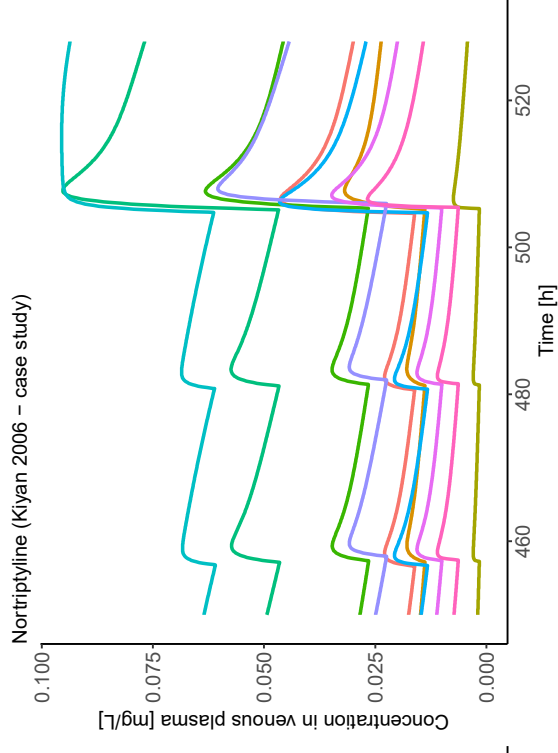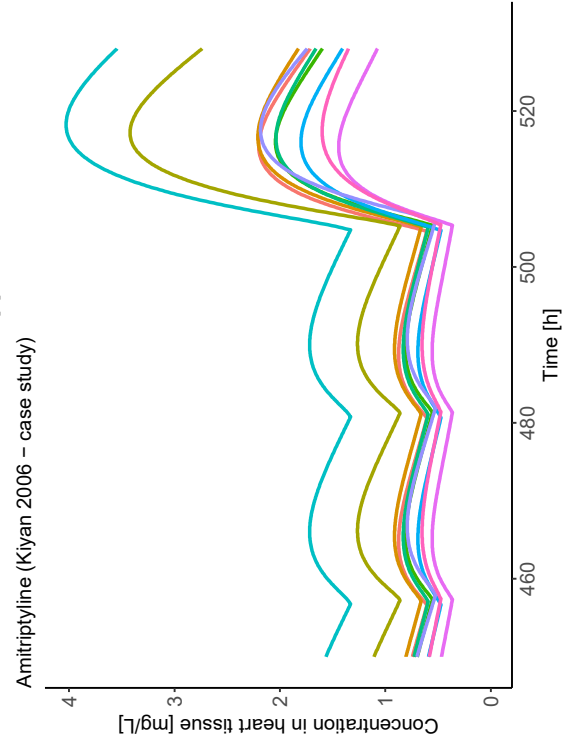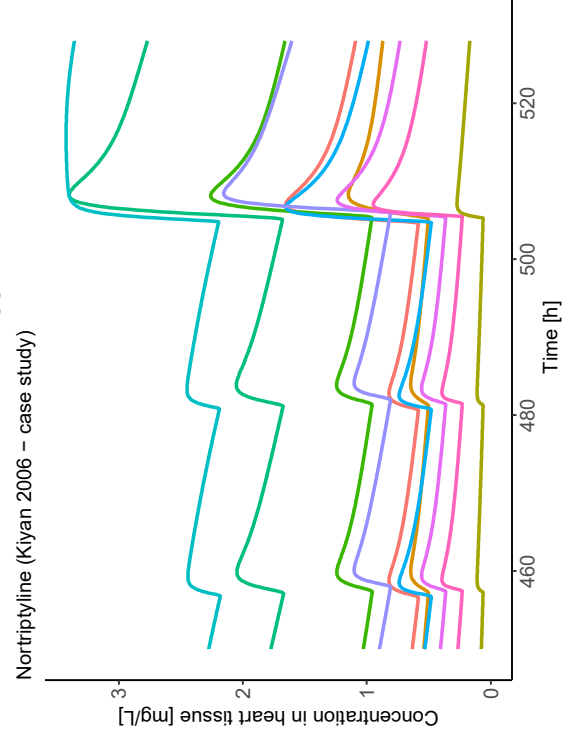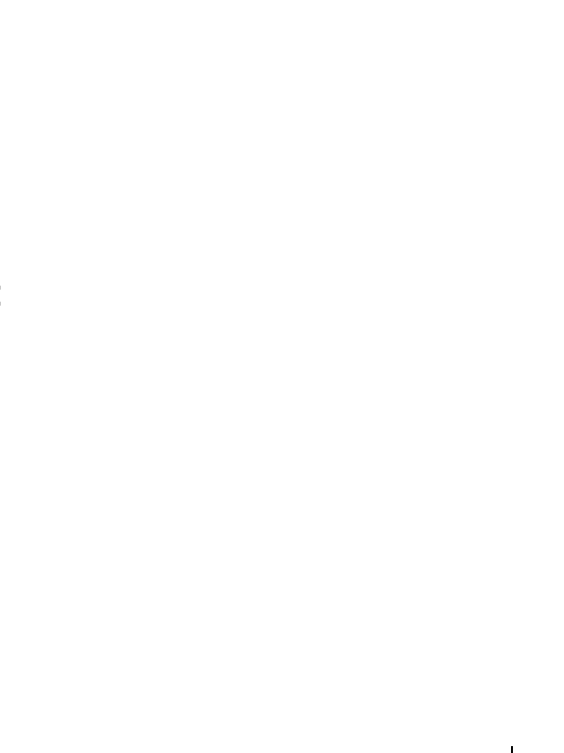

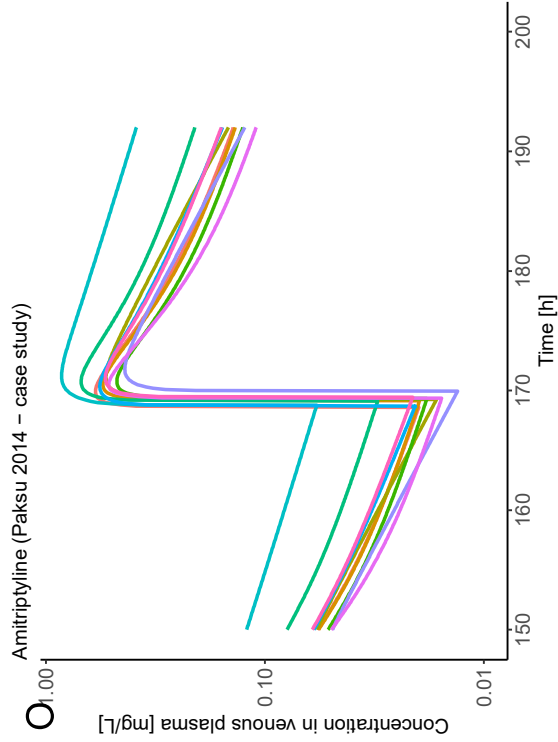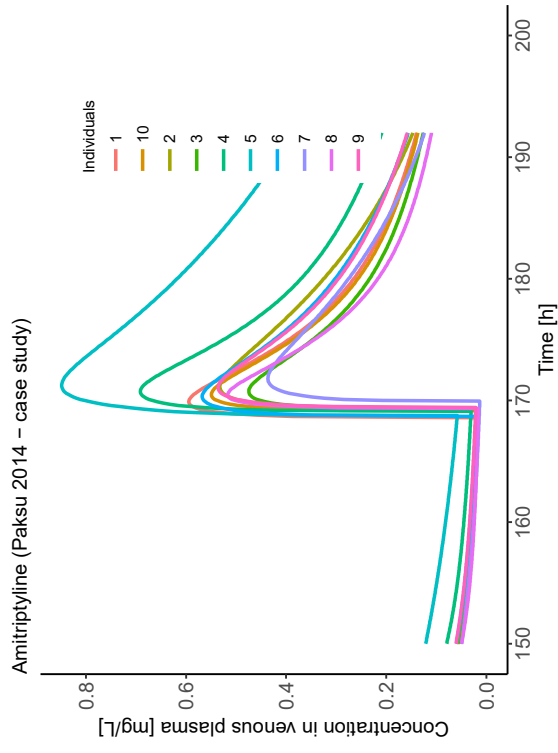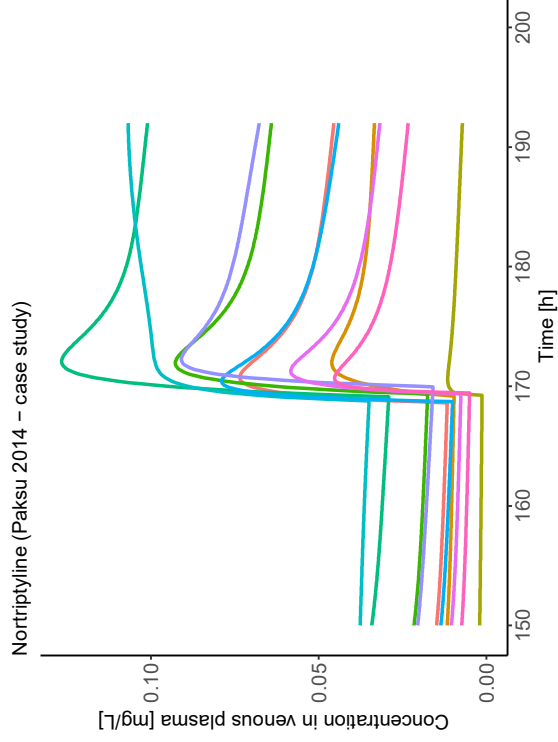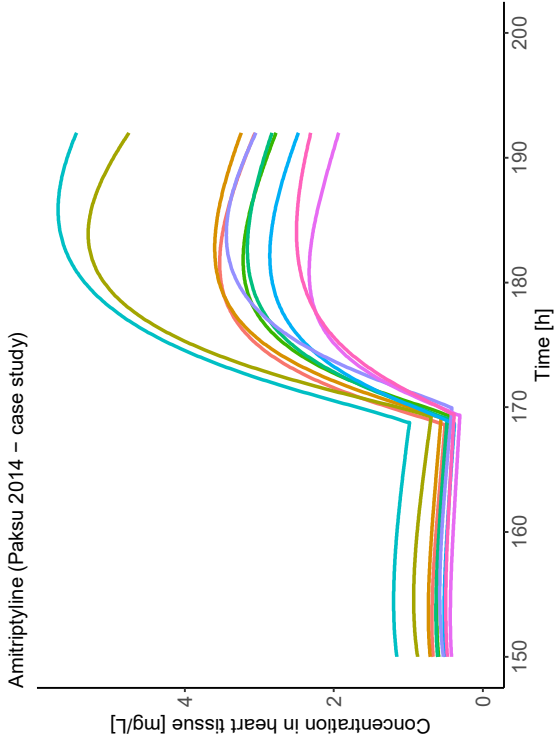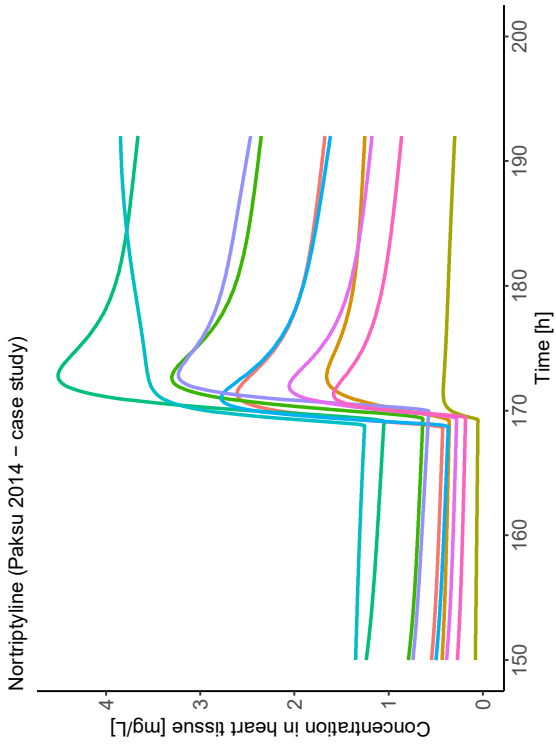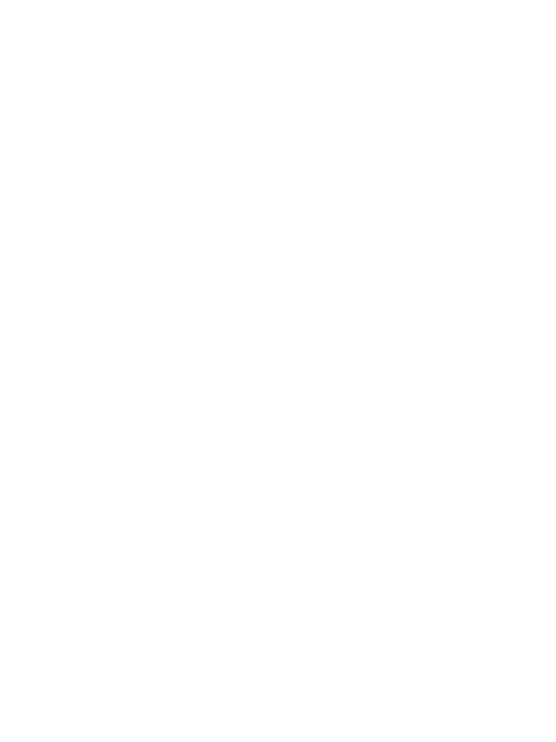

P Amitriptyline (Abeyaratne 2016 - case study of 25-year old female)

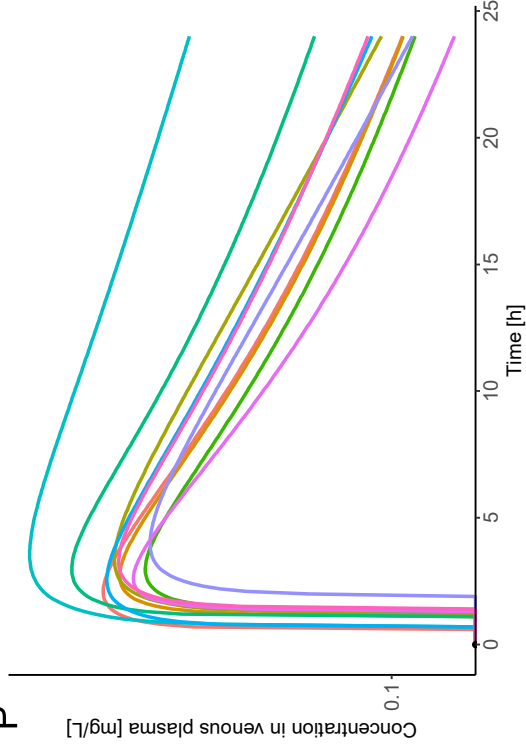

Amitriptyline (Abeyaratne 2016 - case study of 25-year old female)

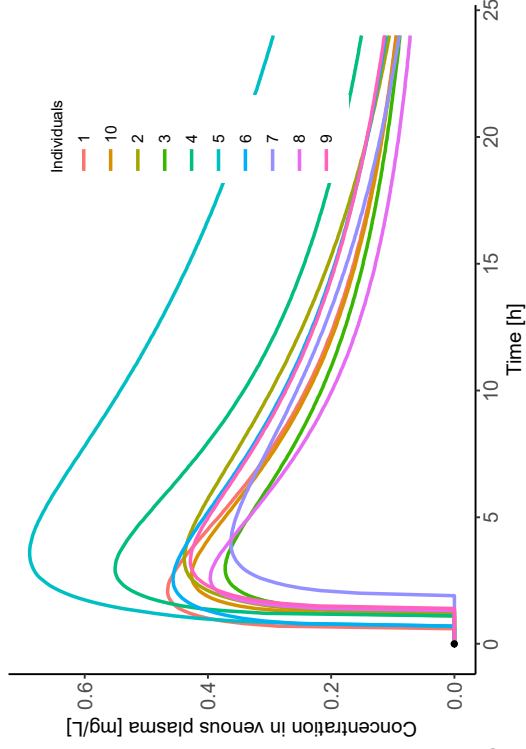

Nortriptyline (Abeyaratne 2016 - case study of 25-year old female)

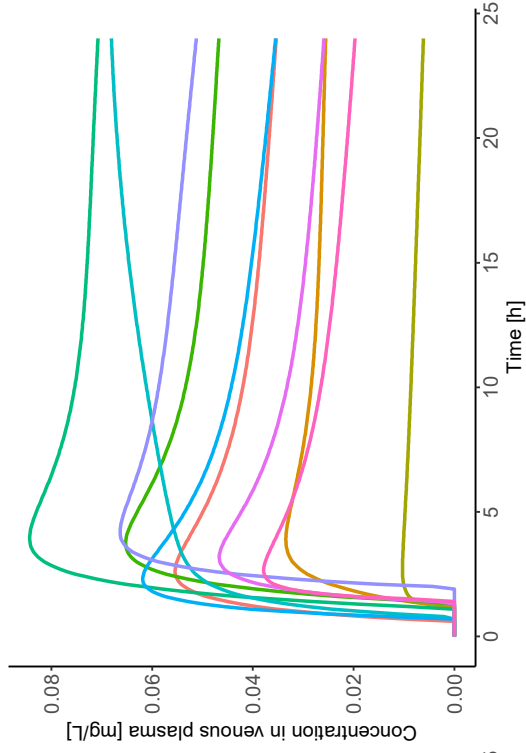

Amitriptyline (Abeyaratne 2016 - case study of 25-year old female)

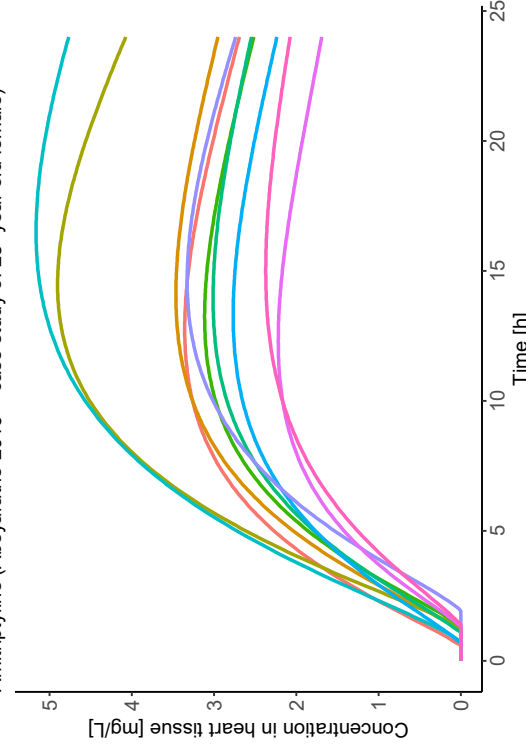

Nortriptyline (Abeyaratne 2016 - case study of 25-year old female)

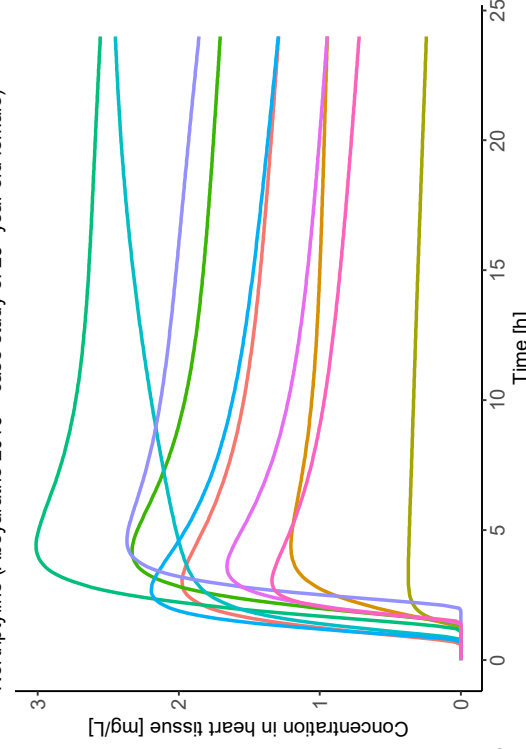

Figure 3 - The simulated QT or QTc for each of the cases in 10 virtual patients (1 - 10) along with clinical observations (obs). The triangle means virtual arrhythmia occurrence.

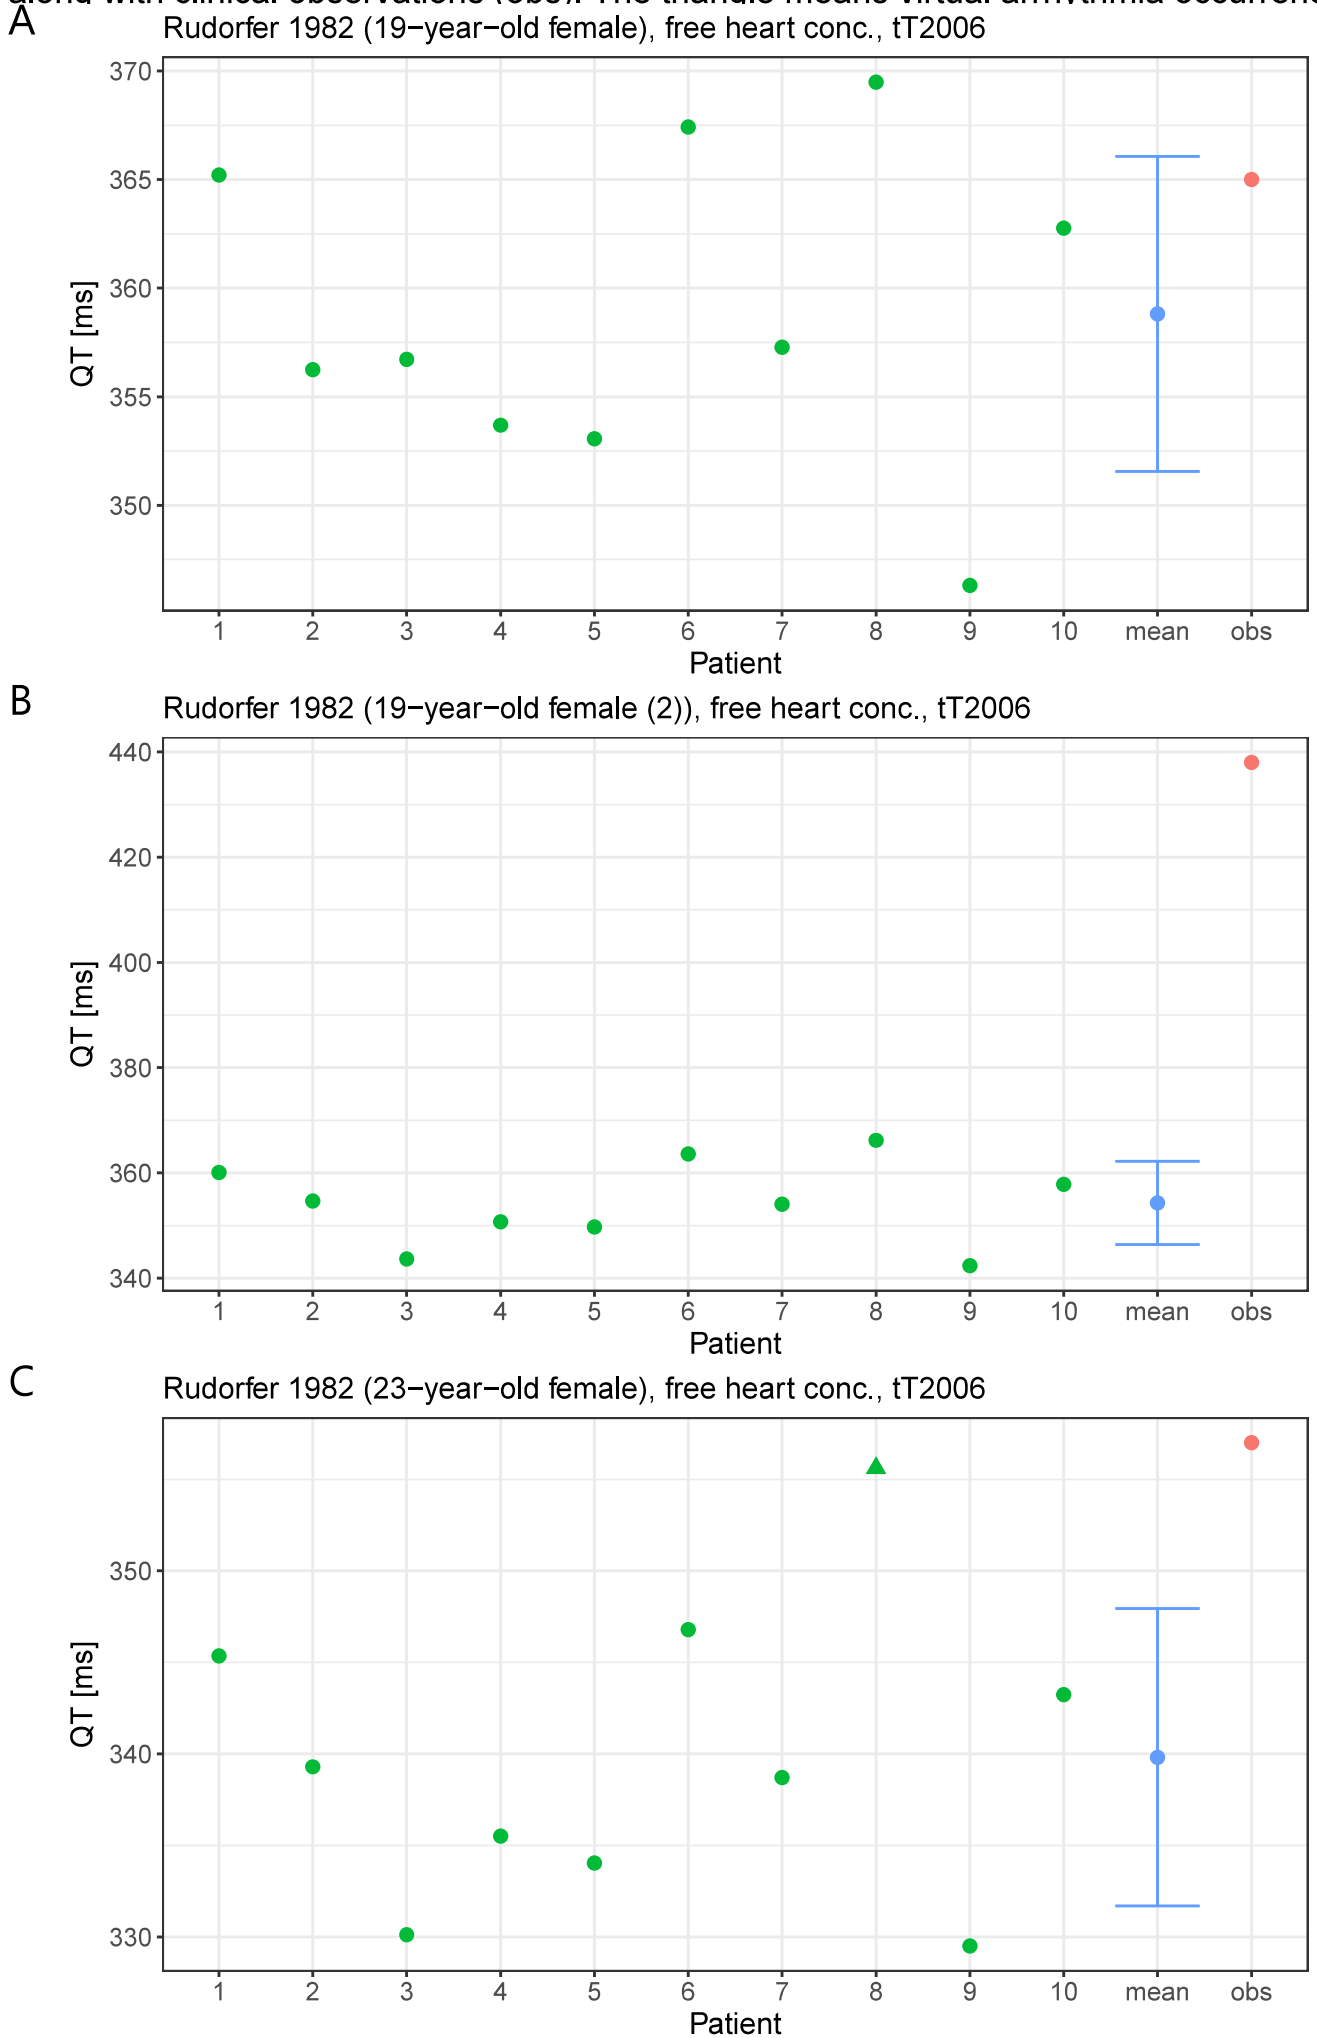



Figure 3 - Continued

D

Rudorfer 1982 (29-year-old female (1)), free heart conc., tT2006

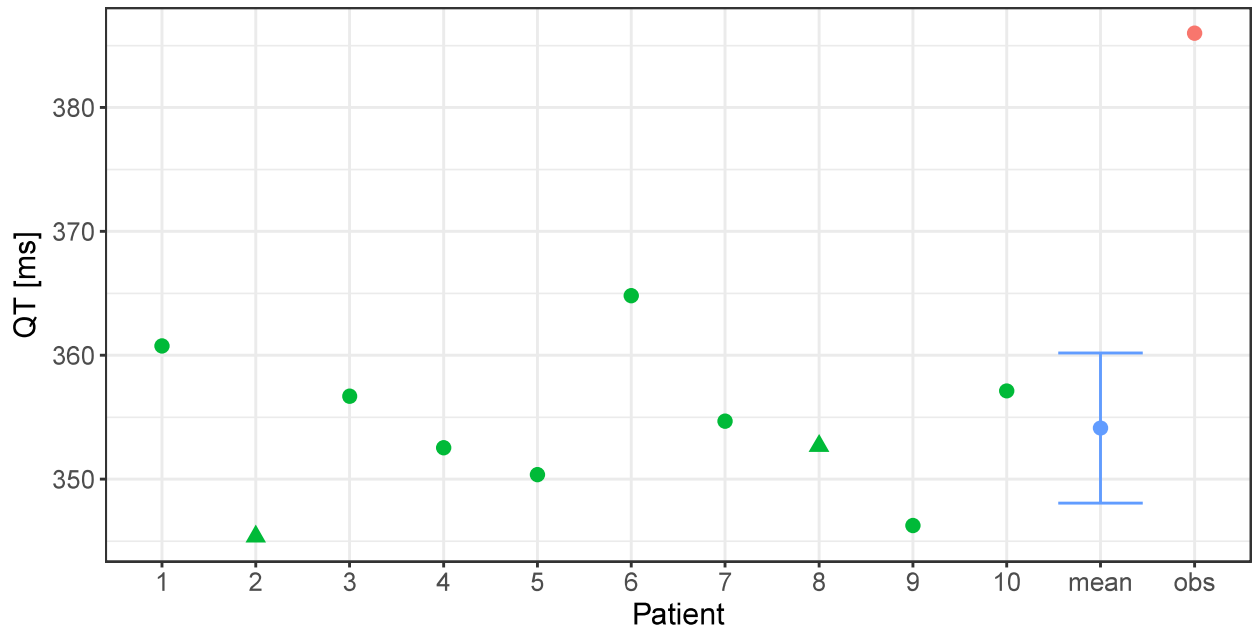

E

Rudorfer 1982 (29-year-old female (2)), free heart conc., tT2006

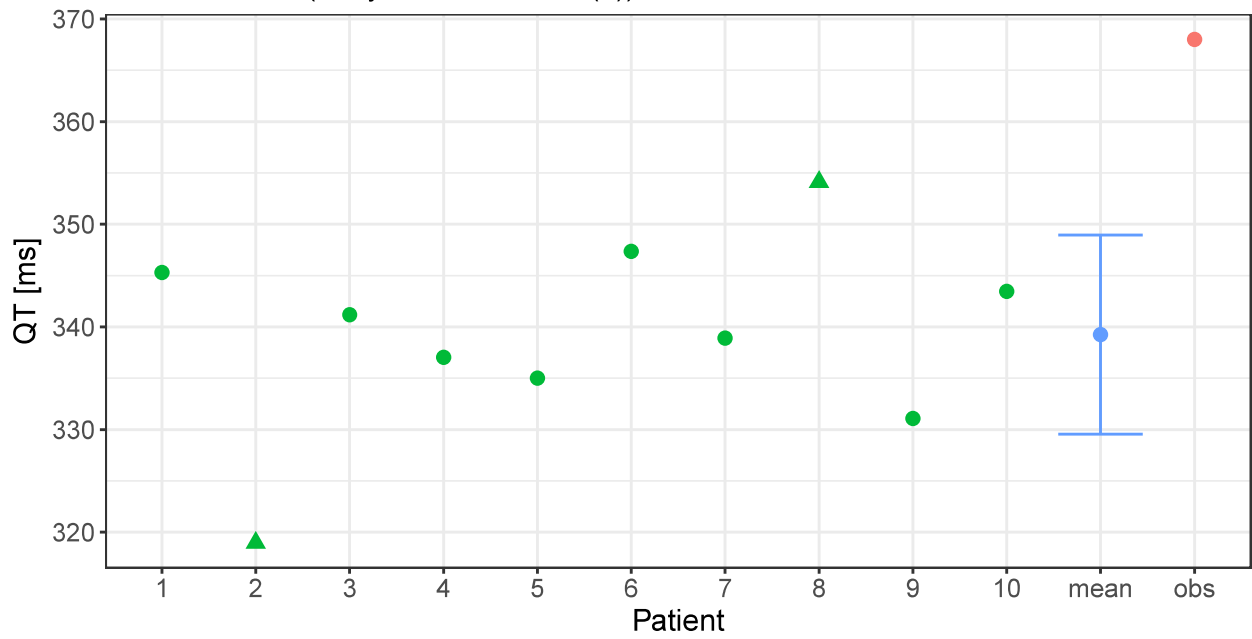

F

Rudorfer 1982 (32-year-old female), free heart conc., tT2006

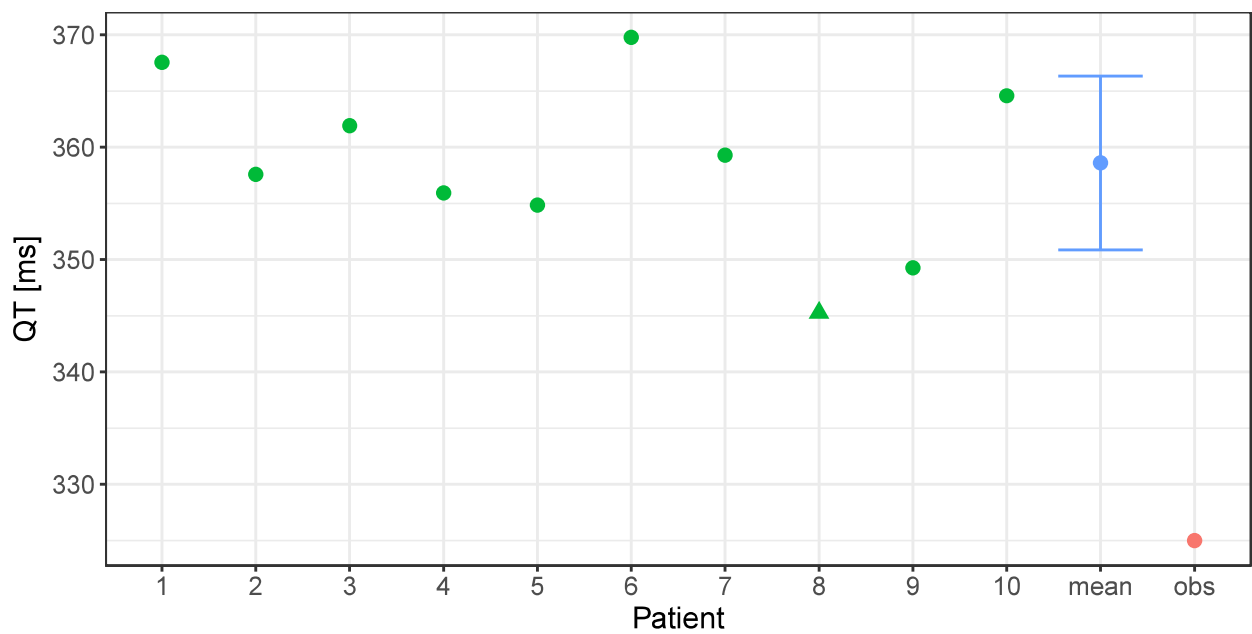

Figure 3 - Continued

G

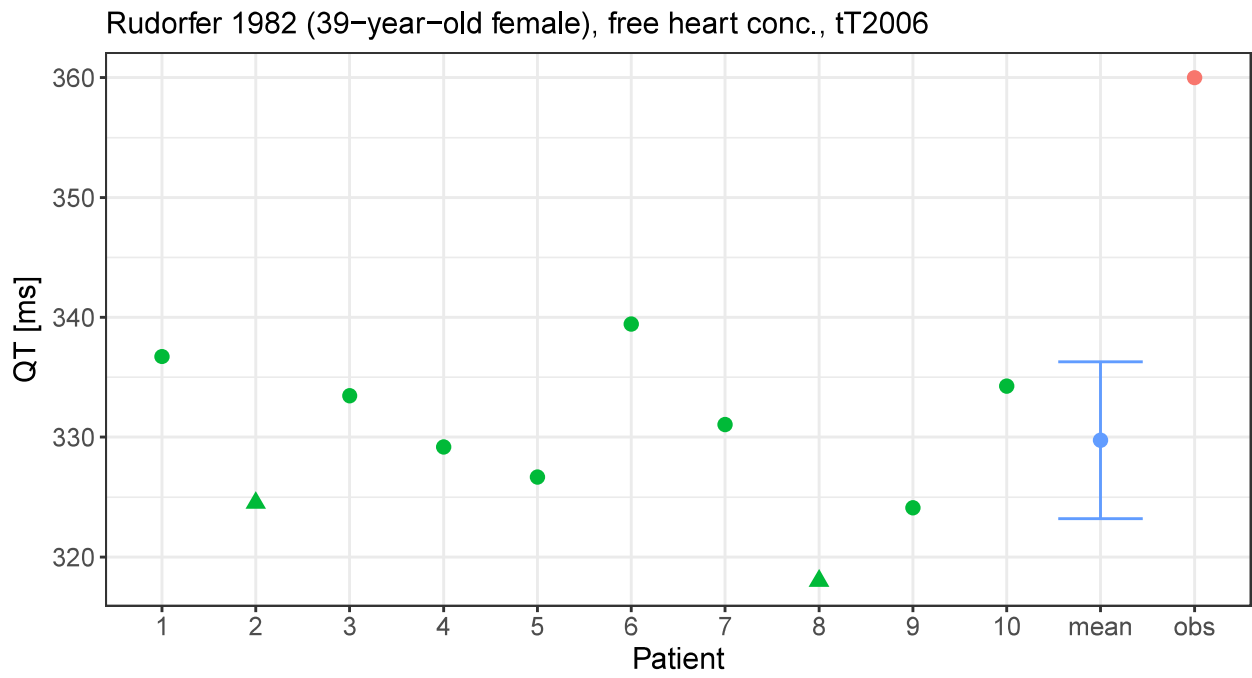

H

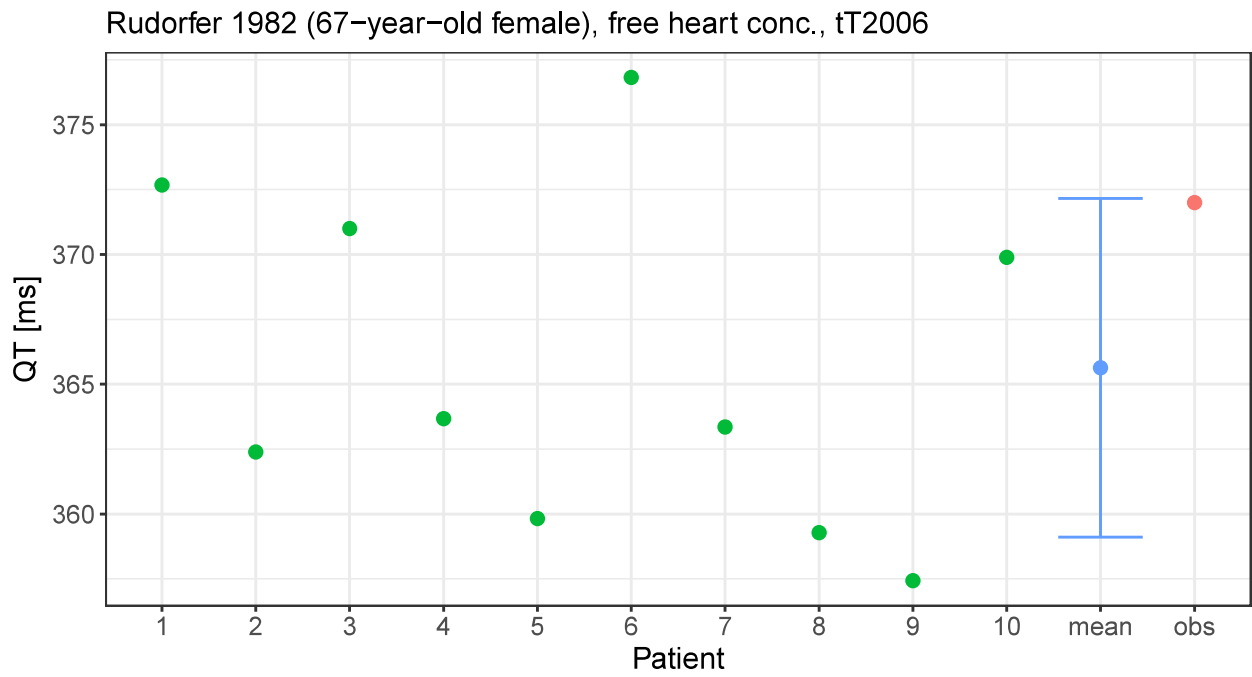

I

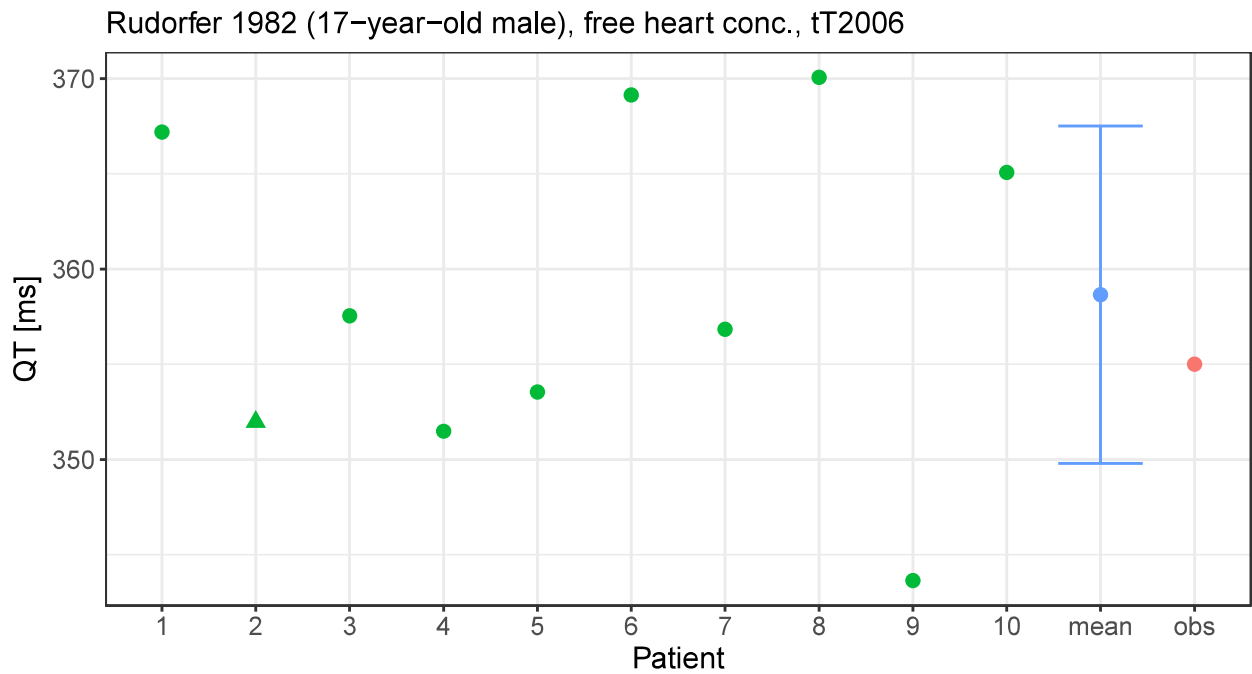

Figure 3 - Continued

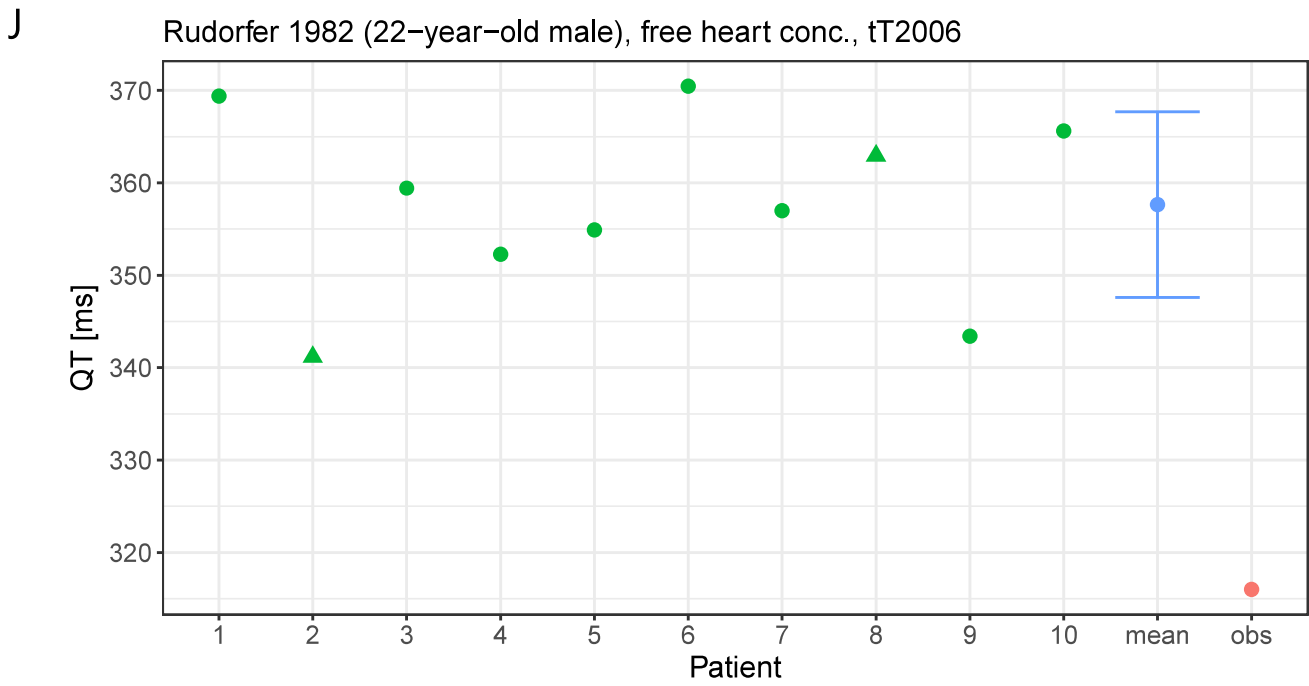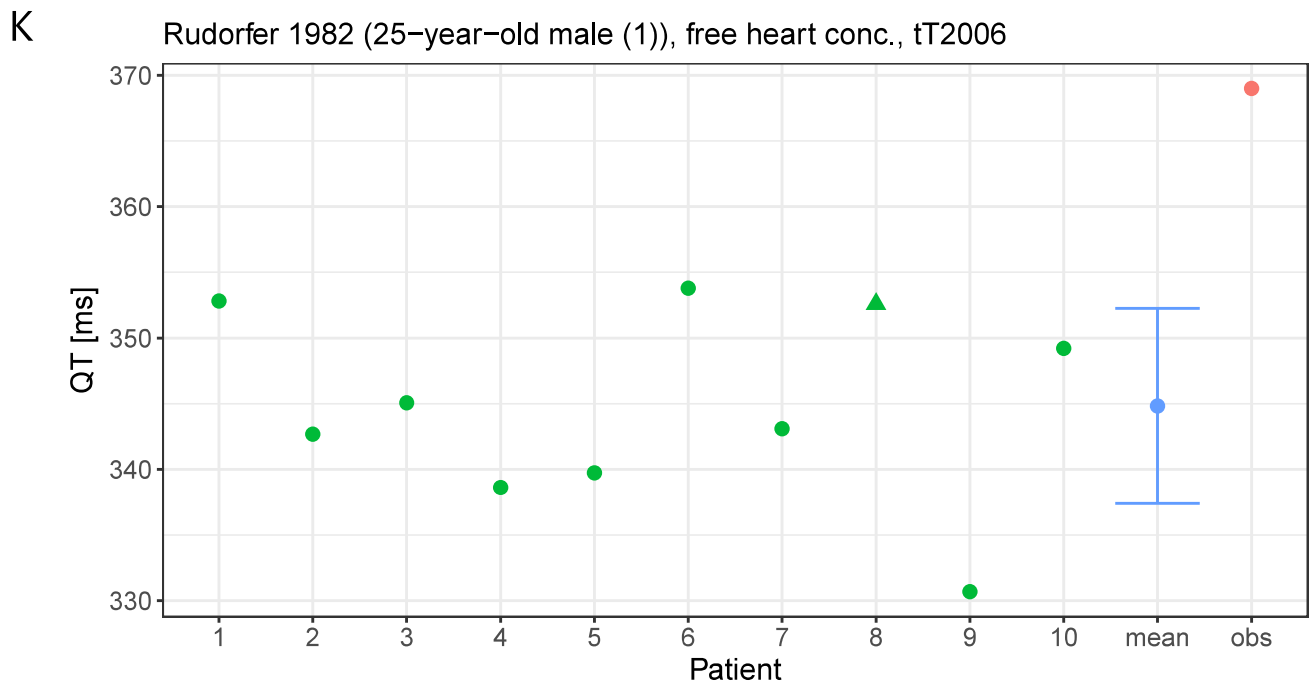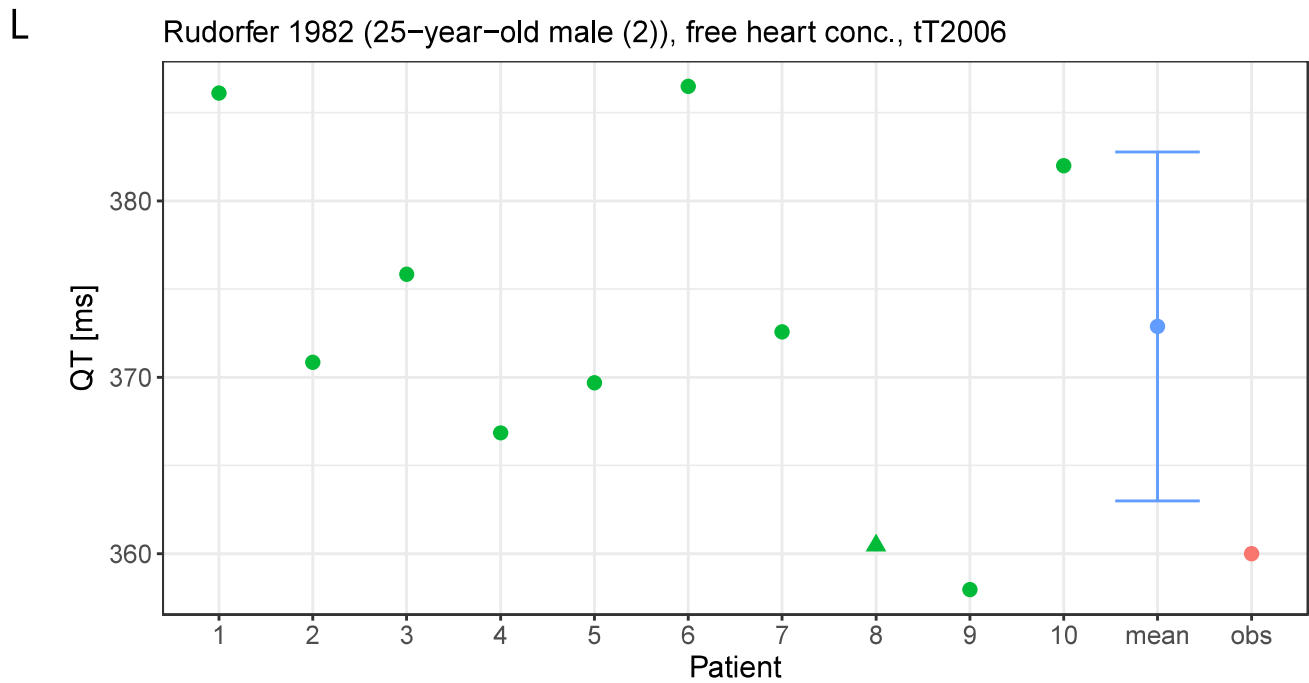

Figure 3 - Continued

M

Erdem 2010 (24-year-old male), free heart conc., tT2006

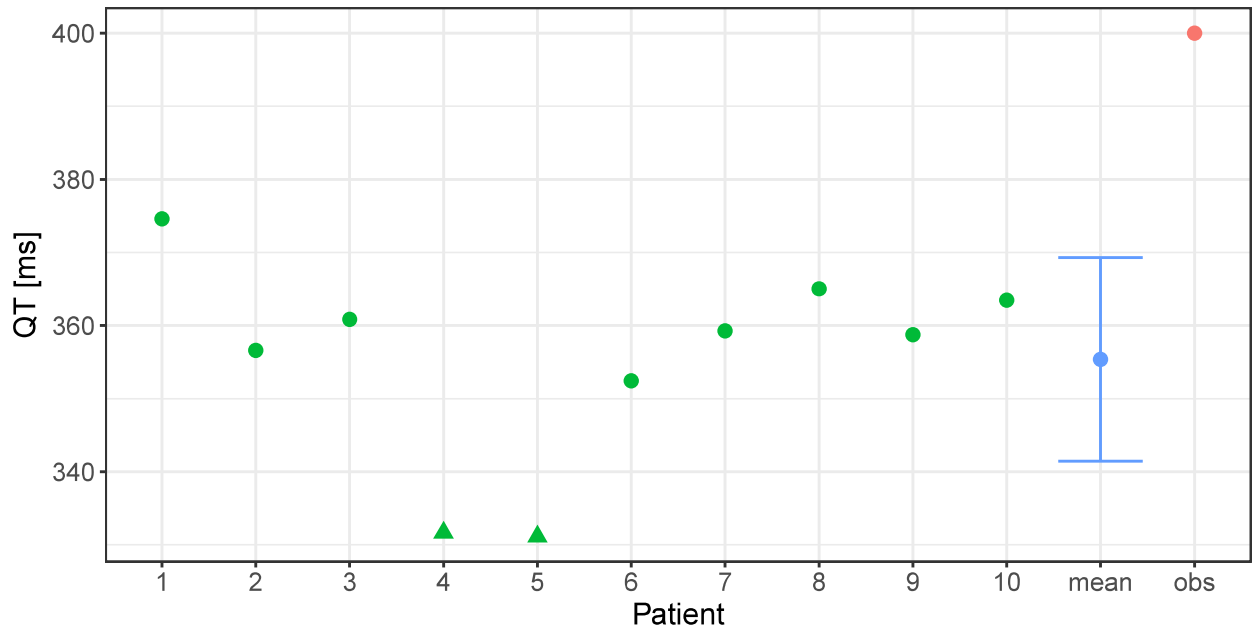

N

Kiyan 2006 (33-year-old female), free heart conc., tT2006

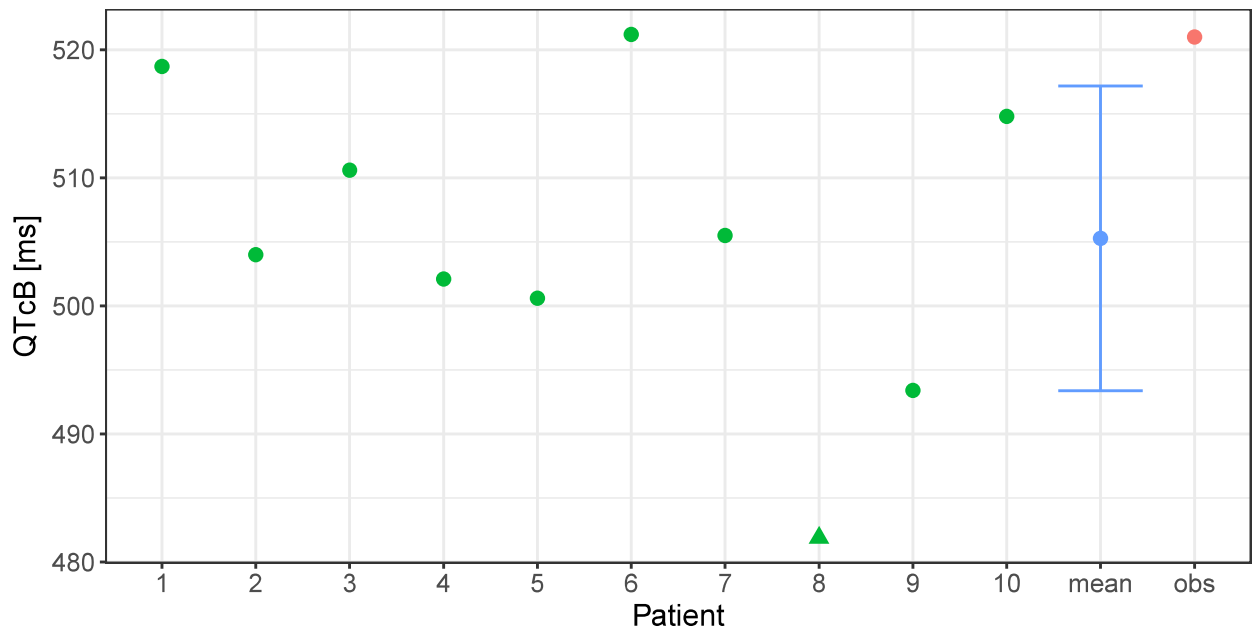

O

Paksu 2014 (34-year-old female), free heart conc., tT2006

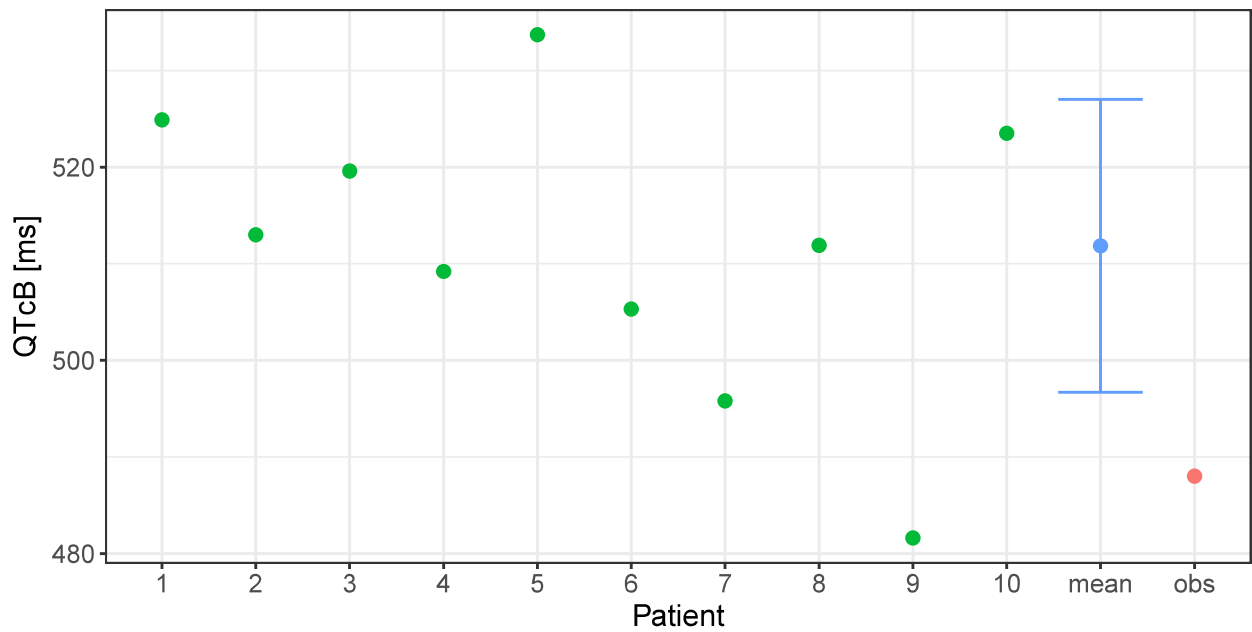

Figure 3 - Continued

P

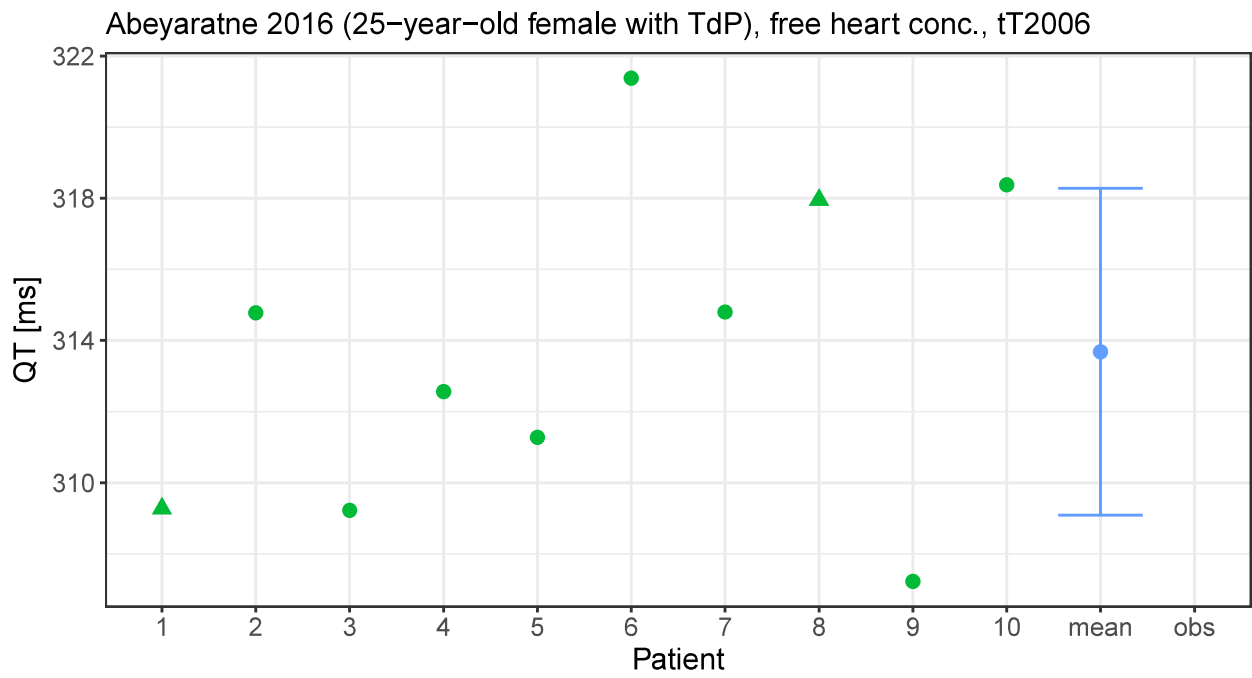

Q

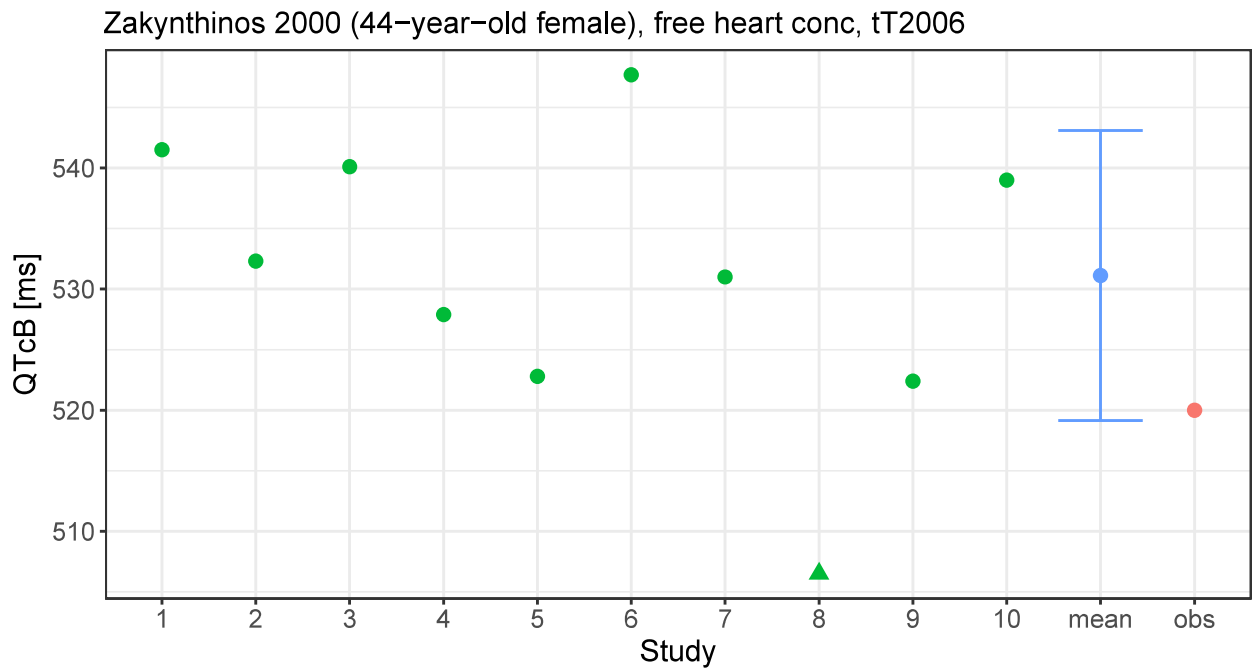

R

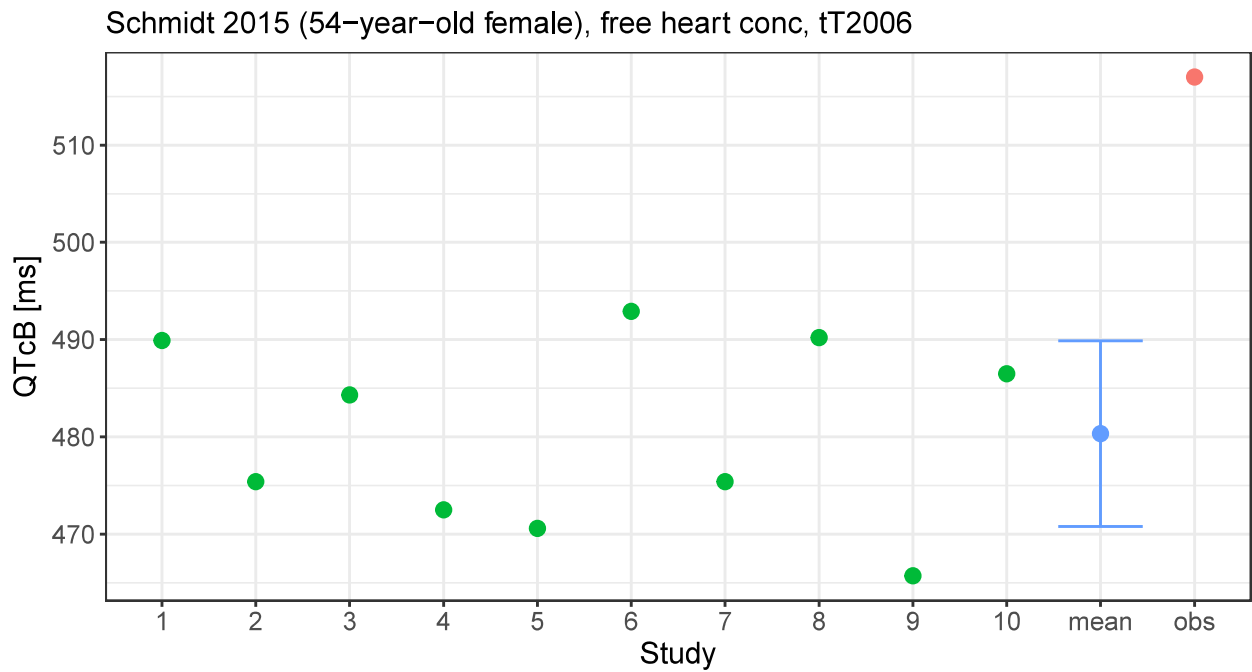

Supplement: 10928_2018_9597_MOESM1_ESM.pdf [file 10928_2018_9597_MOESM1_ESM.pdf]
